# Supplementary material
Source: PubMed Central journal article supplement (PMC3175361)

# Supporting Information

## **Synthesis and Characterization of Conformationally-Preorganized, MiniPEG-Containing $\gamma$ PNAs with Superior Hybridization Properties and Water Solubility**

*Bichismita Sahu, Iulia Sacui, Srinivas Rapireddy, Kimberly J. Zanotti, Raman Bahal, Bruce*

*A. Armitage and Danith H. Ly\**

Department of Chemistry and Center for Nucleic Acids Science and Technology (CNASt),

Carnegie Mellon University, 4400 Fifth Avenue, Pittsburgh, Pennsylvania 15213.

| <b>Contents</b>                                                      | <b>Page</b> |
|----------------------------------------------------------------------|-------------|
| Figure S1. UV-absorption profiles of PNA11-13 after serial dilutions | 3           |
| Figure S2. <sup>1</sup> H-NMR spectrum of compound <b>2</b>          | 4           |
| Figure S3. <sup>13</sup> C-NMR of <b>2</b>                           | 5           |
| Figure S4. <sup>1</sup> H-NMR of <b>3</b>                            | 6           |
| Figure S5. <sup>13</sup> C-NMR of <b>3</b>                           | 7           |
| Figure S6. <sup>1</sup> H-NMR of <b>4</b>                            | 8           |
| Figure S7. <sup>13</sup> C-NMR of <b>4</b>                           | 9           |
| Figure S8. <sup>1</sup> H-NMR of <b>5</b>                            | 10          |
| Figure S9. <sup>13</sup> C-NMR of <b>5</b>                           | 11          |
| Figure S10. <sup>1</sup> H-NMR of <b>6a</b>                          | 12          |
| Figure S11. <sup>13</sup> C-NMR of <b>6a</b>                         | 13          |
| Figure S12. <sup>1</sup> H-NMR of <b>6b</b>                          | 14          |
| Figure S13. <sup>13</sup> C-NMR of <b>6b</b>                         | 15          |
| Figure S14. <sup>1</sup> H-NMR of <b>6c</b>                          | 16          |
| Figure S15. <sup>13</sup> C-NMR of <b>6c</b>                         | 17          |
| Figure S16. <sup>1</sup> H-NMR of <b>6d</b>                          | 18          |
| Figure S17. <sup>13</sup> C-NMR of <b>6d</b>                         | 19          |
| Figure S18. <sup>1</sup> H-NMR of <b>7a</b>                          | 20          |
| Figure S19. <sup>13</sup> C-NMR of <b>7a</b>                         | 21          |
| Figure S20. <sup>1</sup> H-NMR of <b>7b</b>                          | 22          |
| Figure S21. <sup>13</sup> C-NMR of <b>7b</b>                         | 23          |
| Figure S22. <sup>1</sup> H-NMR of <b>7c</b>                          | 24          |
| Figure S23. <sup>13</sup> C-NMR of <b>7c</b>                         | 25          |
| Figure S24. <sup>1</sup> H-NMR of <b>7d</b>                          | 26          |
| Figure S25. <sup>13</sup> C-NMR of <b>7d</b>                         | 27          |
| Figure S26. <sup>1</sup> H-NMR of <b>8</b>                           | 28          |
| Figure S27. <sup>13</sup> C-NMR of <b>8</b>                          | 29          |
| Figure S28. <sup>1</sup> H-NMR of <b>9</b>                           | 30          |
| Figure S29. <sup>13</sup> C-NMR of <b>9</b>                          | 31          |
| Figure S30. <sup>1</sup> H-NMR of <b>10</b>                          | 32          |
| Figure S31. <sup>13</sup> C-NMR of <b>10</b>                         | 33          |
| Figure S32. Reinjecting HPLC trace of PNA1                           | 34          |
| Figure S33. MALDI-TOF spectrum of PNA1                               | 35          |
| Figure S34. Reinjecting HPLC trace of PNA2                           | 36          |
| Figure S35. MALDI-TOF of PNA2                                        | 37          |
| Figure S36. Reinjecting HPLC trace of PNA3                           | 38          |
| Figure S37. MALDI-TOF of PNA3                                        | 39          |
| Figure S38. Reinjecting HPLC trace of PNA4                           | 40          |
| Figure S39. MALDI-TOF of PNA4                                        | 41          |
| Figure S40. Reinjecting HPLC trace of PNA5                           | 42          |
| Figure S41. MALDI-TOF of PNA5                                        | 43          |
| Figure S42. Reinjecting HPLC trace of PNA6                           | 44          |
| Figure S43. MALDI-TOF of PNA6                                        | 45          |
| Figure S44. Reinjecting HPLC trace of PNA7                           | 46          |
| Figure S45. MALDI-TOF of PNA7                                        | 47          |
| Figure S46. Reinjecting HPLC trace of PNA8                           | 48          |
| Figure S47. MALDI-TOF of PNA8                                        | 49          |
| Figure S48. Reinjecting HPLC trace of PNA9                           | 50          |
| Figure S49. MALDI-TOF of PNA9                                        | 51          |
| Figure S50. Reinjecting HPLC trace of PNA10                          | 52          |
| Figure S51. MALDI-TOF of PNA10                                       | 53          |

|                                                                        |    |
|------------------------------------------------------------------------|----|
| Figure S52. Reinject HPLC trace of PNA1X                               | 54 |
| Figure S53. MALDI-TOF of PNA1X                                         | 55 |
| Figure S54. Reinject HPLC trace of PNA1Y                               | 56 |
| Figure S55. MALDI-TOF of PNA1Y                                         | 57 |
| Figure S56. Reinject HPLC trace of PNA4X                               | 58 |
| Figure S57. MALDI-TOF of PNA4X                                         | 59 |
| Figure S58. Reinject HPLC trace of PNA4Y                               | 60 |
| Figure S59. MALDI-TOF of PNA4Y                                         | 61 |
| Figure S60. UV-melting curves of PNA5 with <b>PM</b> and <b>MM</b> DNA | 62 |
| Figure S61. UV-melting curves PNA5 with <b>PM</b> and <b>MM</b> RNA    | 63 |
| Figure S62. CD-melting curve of PNA2                                   | 64 |
| Figure S63. CD-melting curve of PNA3                                   | 65 |
| Figure S64. CD-melting curve of PNA4                                   | 66 |
| Figure S65. CD-melting curve of PNA5                                   | 67 |
| Figure S66. SPR sensorgrams of PNA1-5                                  | 68 |

**Figure S1.** UV-absorption profiles of saturated solutions of PNA11-13 after serial dilutions. The result shows that PNA12, which contained a single unit of L-alanine-derived  $\gamma$ PNA, is more water soluble than the parent oligomer (PNA11). When fully-modified (PNA13), methylene group installed at every  $\gamma$ -backbone position, significantly decreased compared to PNA10 and PNA11.

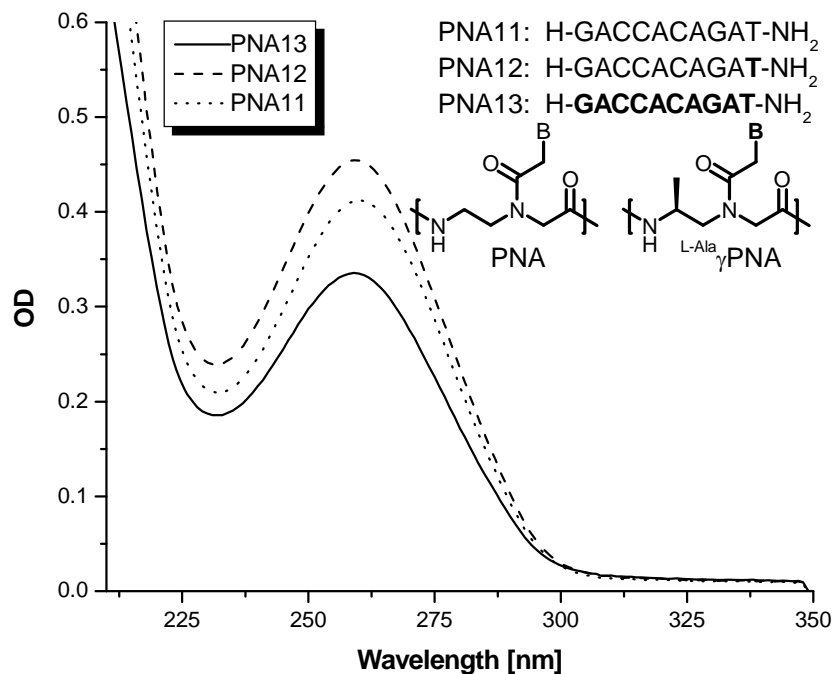

**Figure S2.**  $^1\text{H-NMR}$  spectrum of Boc-(2-(2-methoxyethoxy)ethyl)-L-serine (**2**)

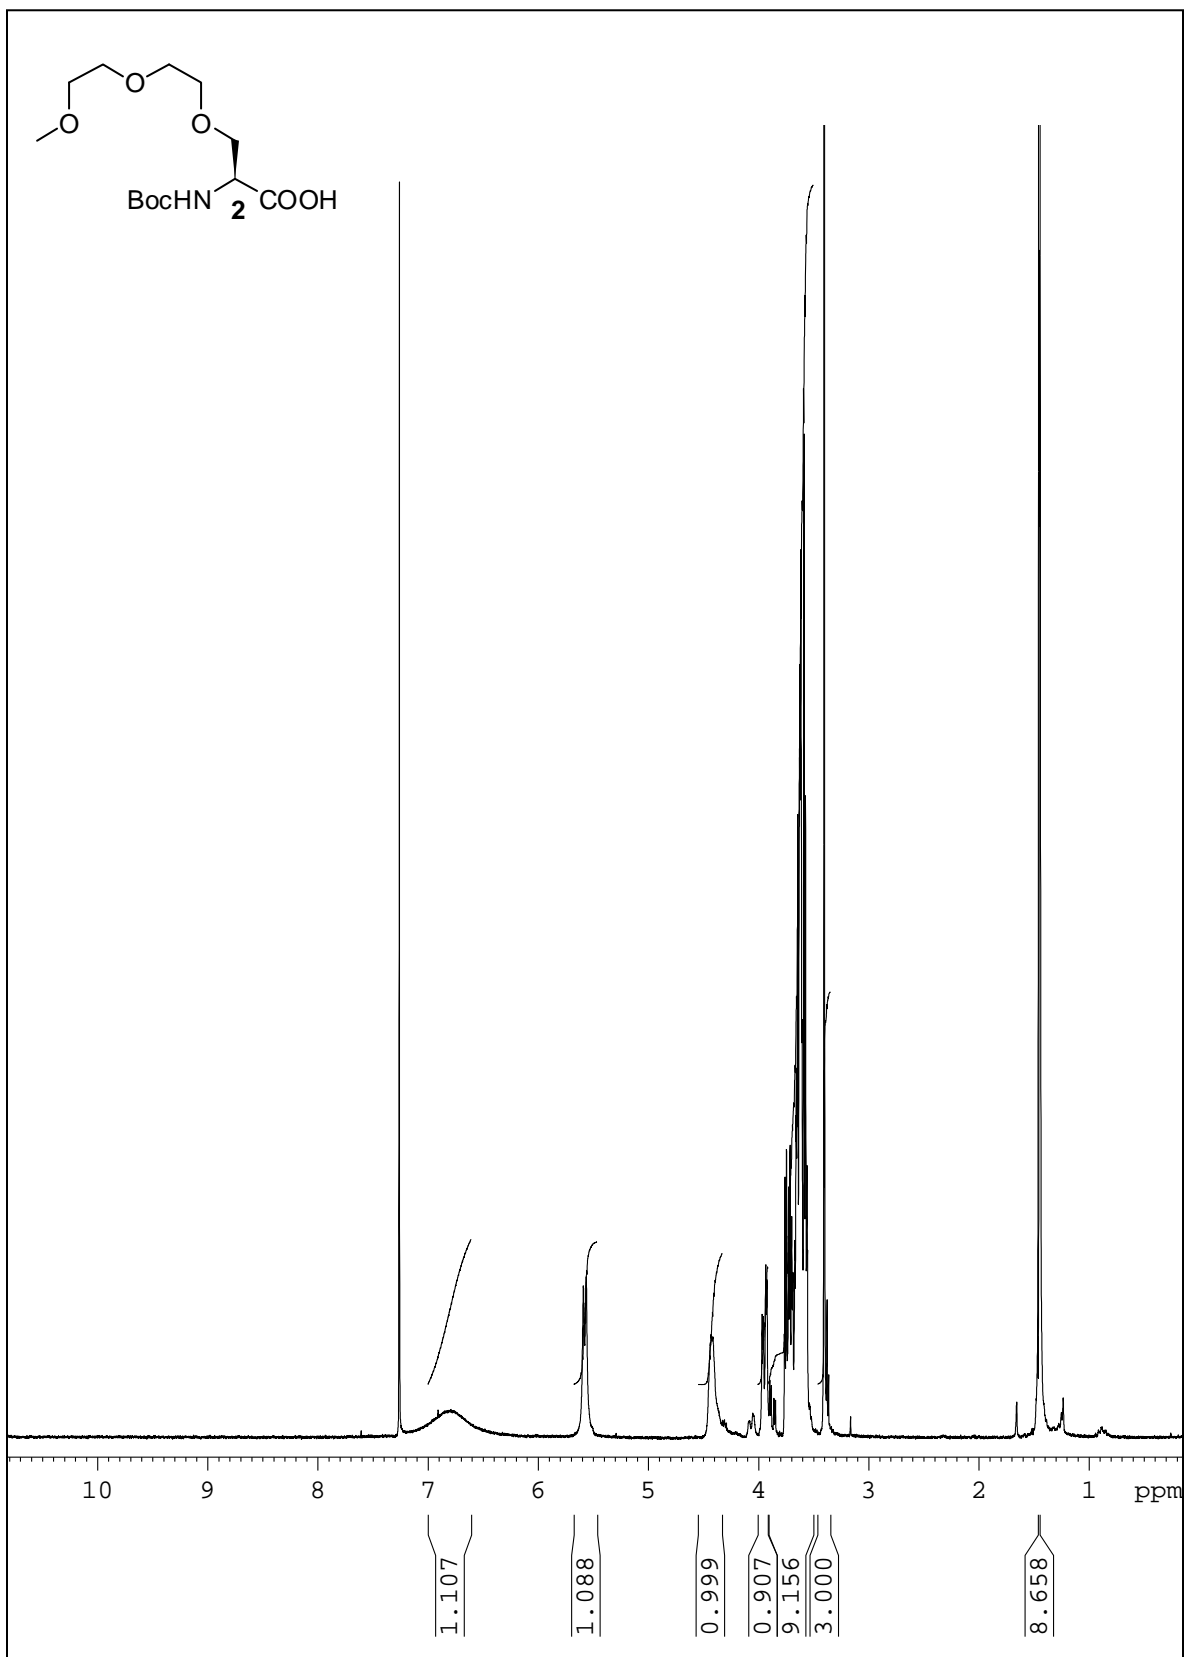

Figure S3.  $^{13}\text{C}$ -NMR of Boc-(2-(2-methoxyethoxy)ethyl)-L-serine (2)

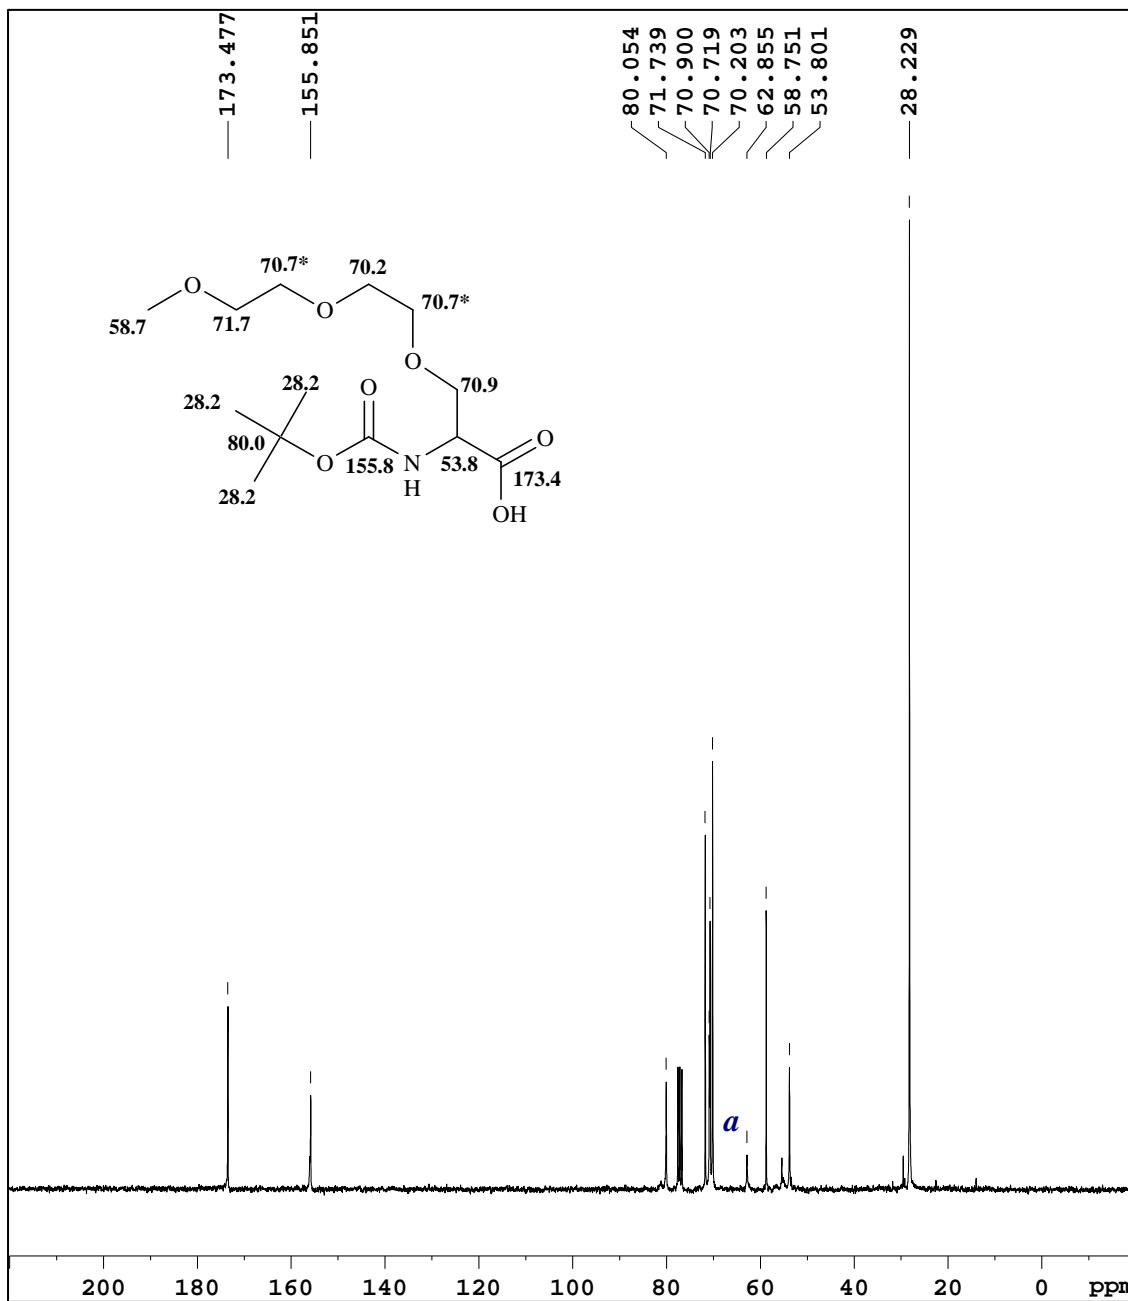

\* Peaks are merged together

a Impurity peak

**Figure S4.**  $^1\text{H-NMR}$  of Boc-(2-(2-methoxyethoxy)ethyl)-L-serine-ol (**3**)

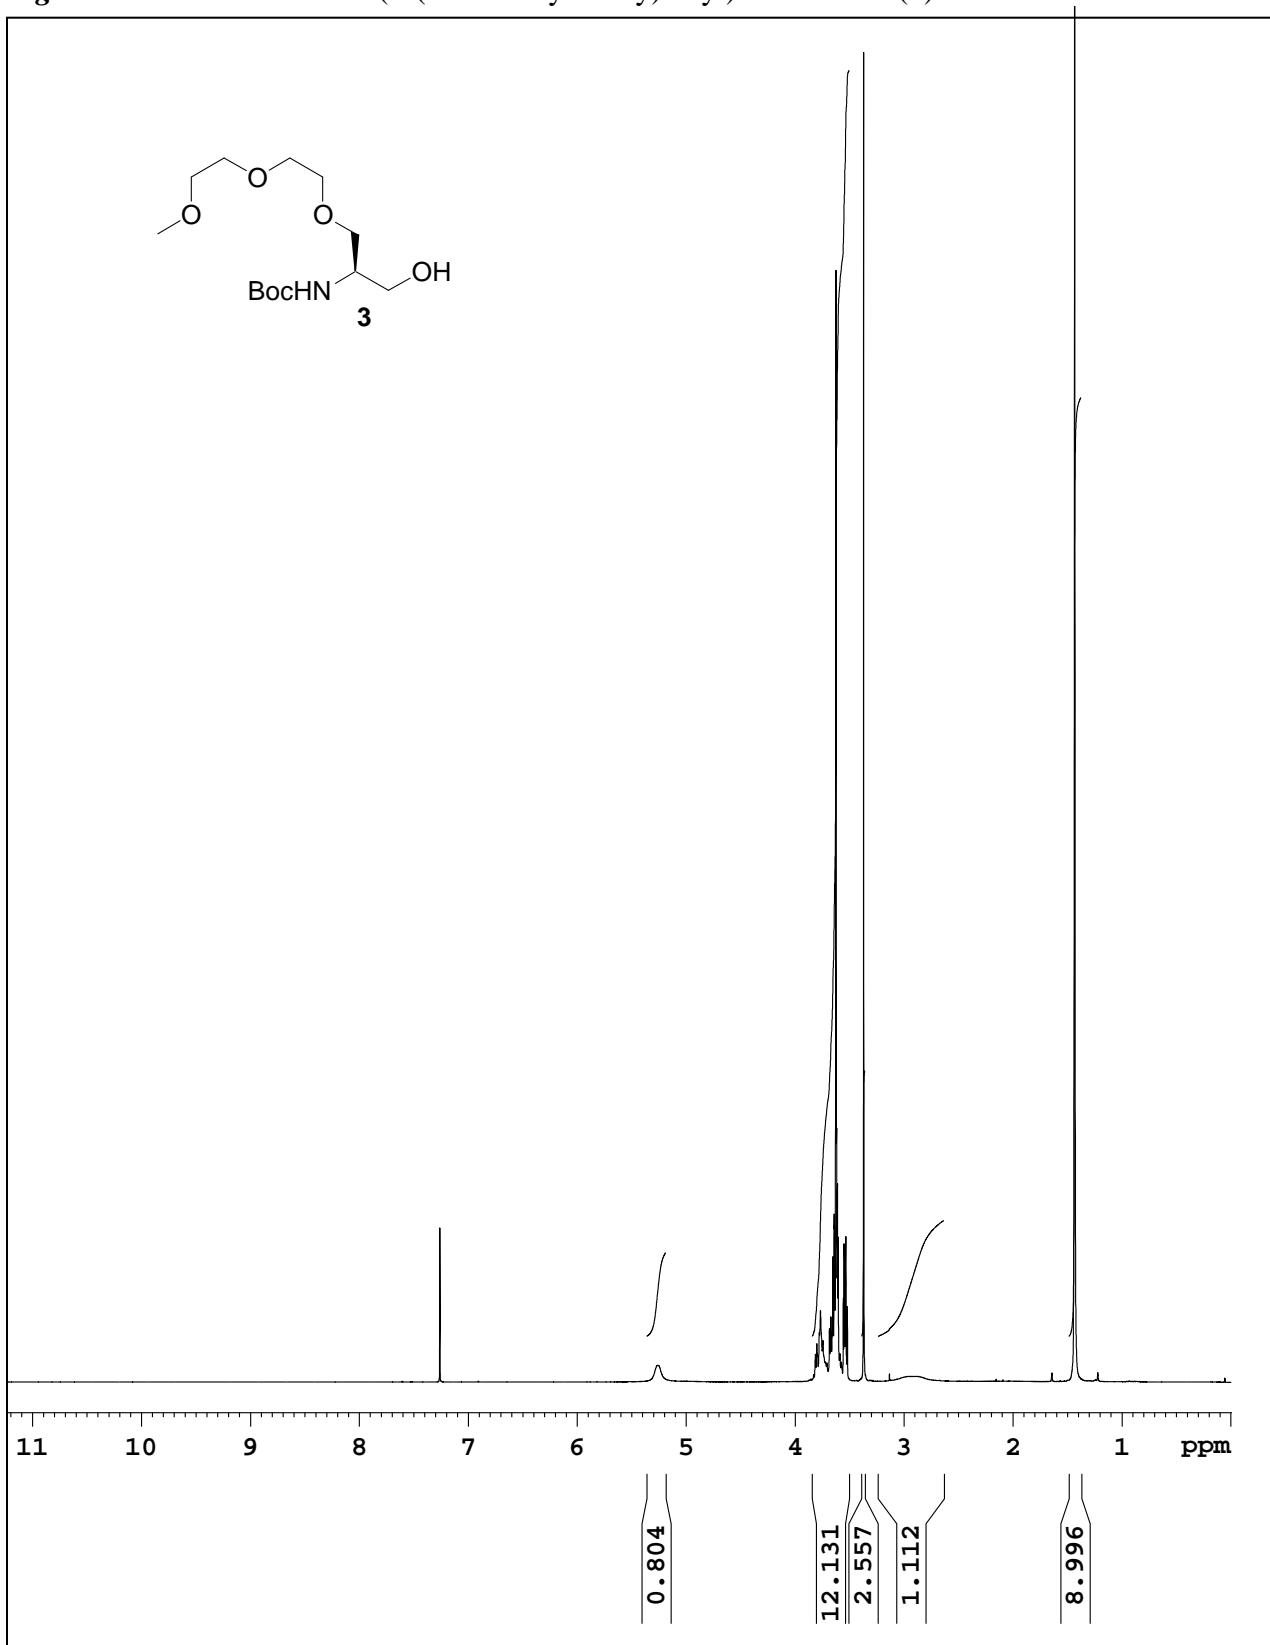

Figure S5.  $^{13}\text{C}$ -NMR of Boc-(2-(2-methoxyethoxy)ethyl)-L-serine-ol (3)

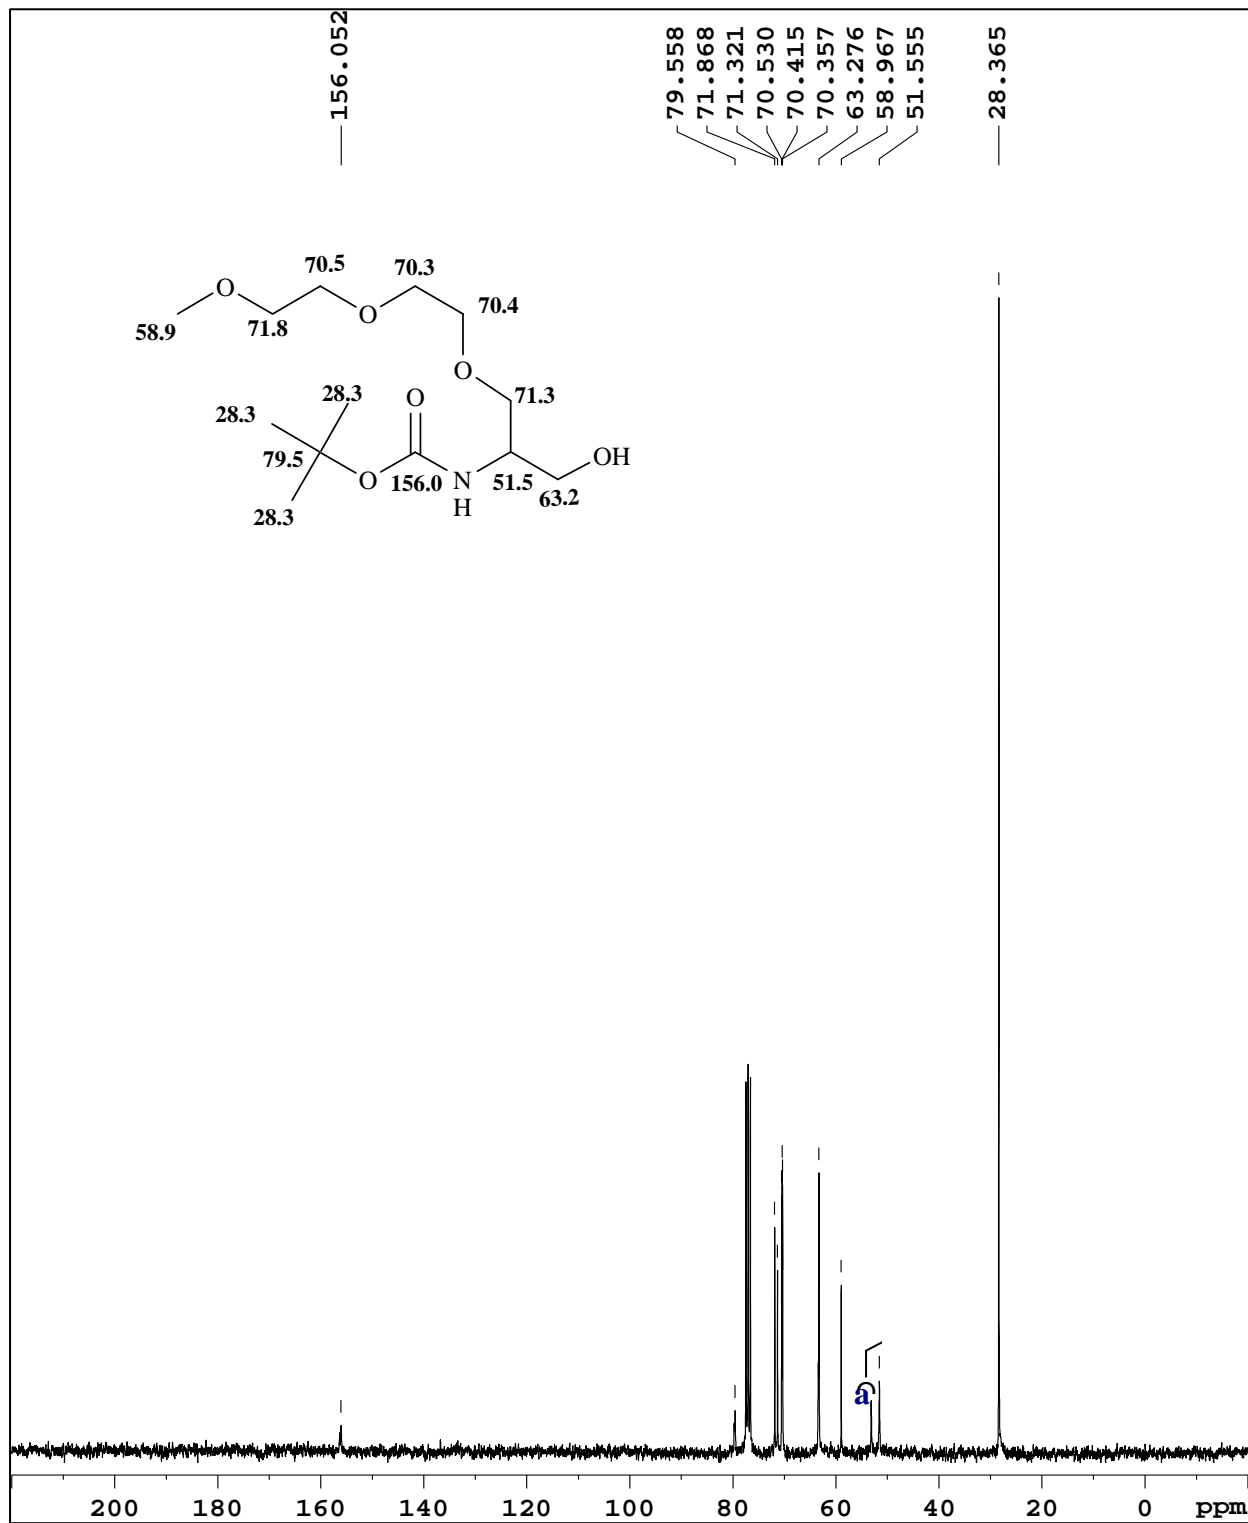

**a** Impurity peak

**Figure S6.**  $^1\text{H-NMR}$  of Boc-(2-(2-methoxyethoxy)ethyl)-L-serine - $\Psi$ [CH<sub>2</sub>N(o,p-diNBS)]Gly-OEt (**4**)

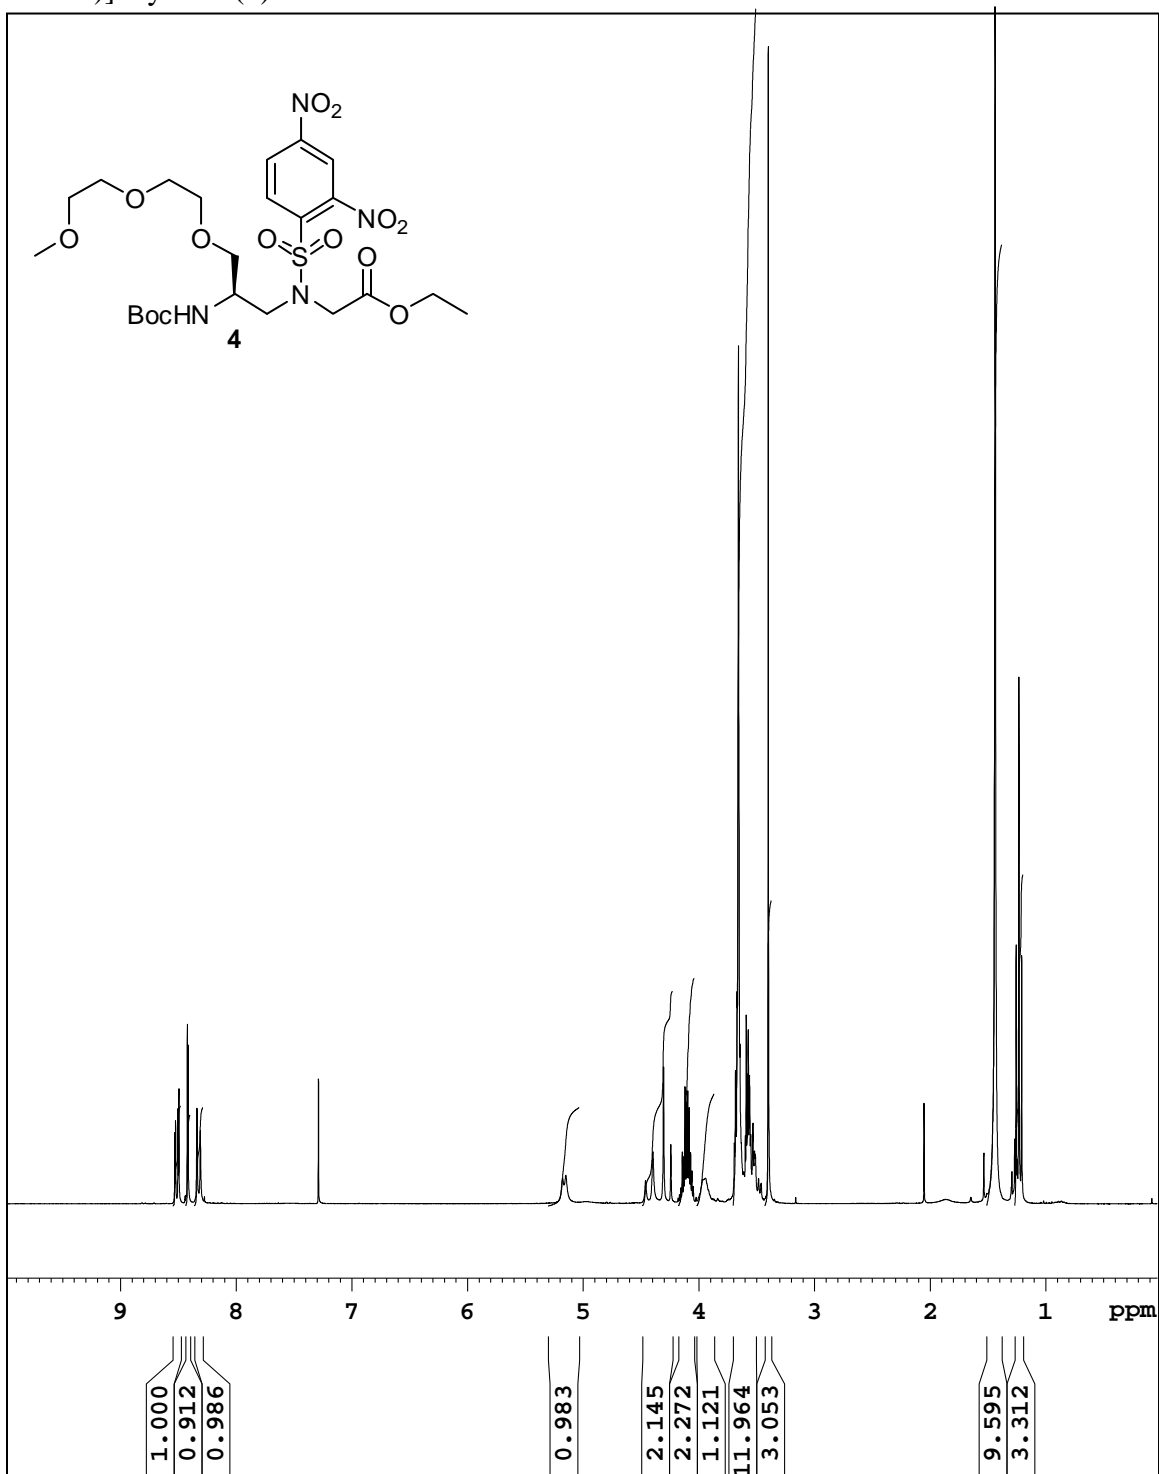



**Figure S7.**  $^{13}\text{C}$ -NMR of Boc-(2-(2-methoxyethoxy)ethyl)-L-serine - $\Psi$ [CH<sub>2</sub>N(o,p-diNBS)]Gly-OEt (**4**)

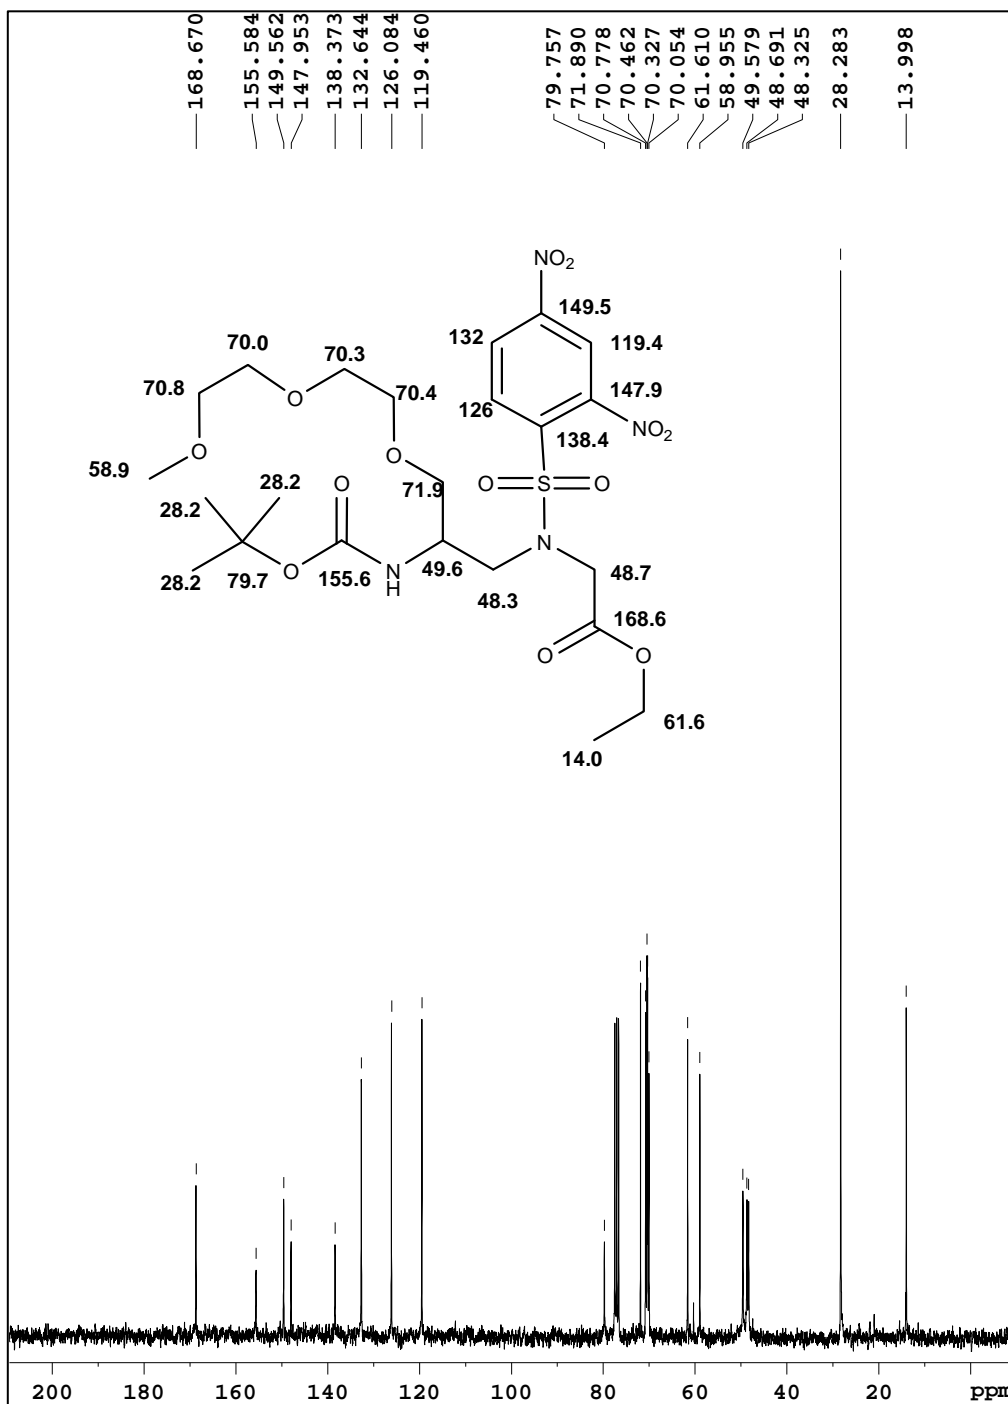

**Figure S8.**  $^1\text{H-NMR}$  of Boc-(2-(2-methoxyethoxy)ethyl)-L-serine backbone ethyl ester (**5**)

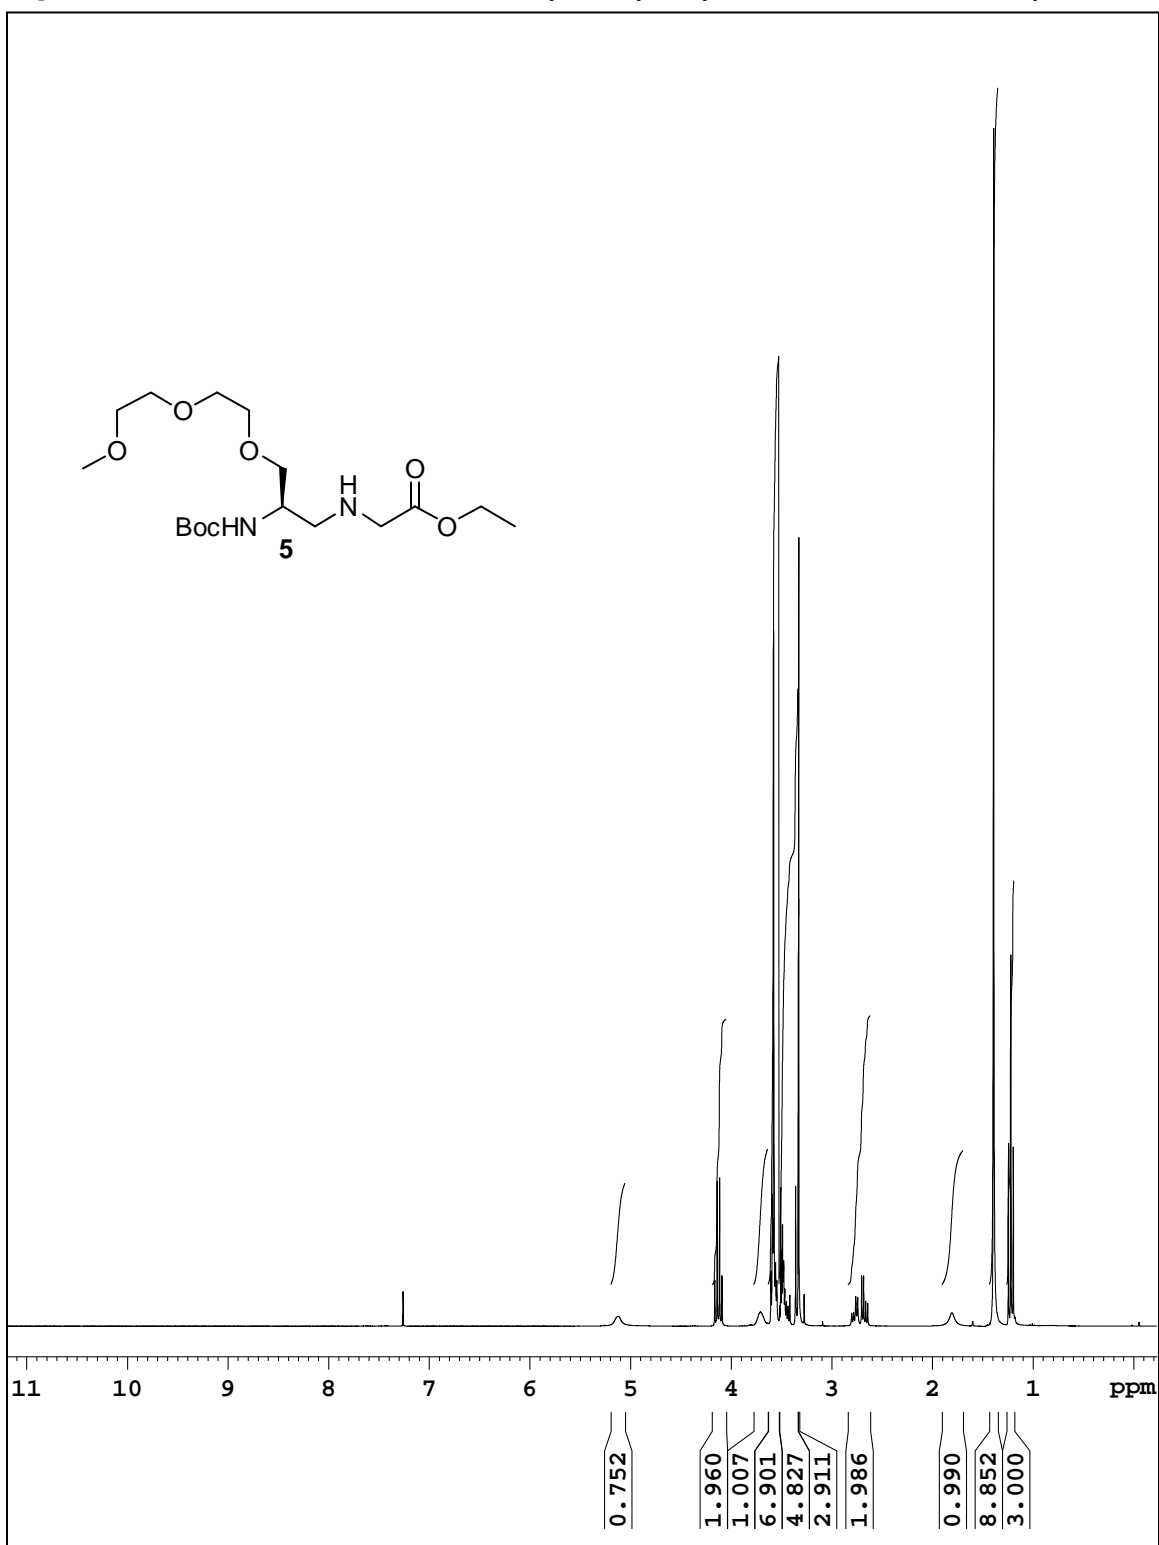

Figure S9.  $^{13}\text{C}$ -NMR of Boc-(2-(2-methoxyethoxy)ethyl)-L-serine backbone ethyl ester (5)

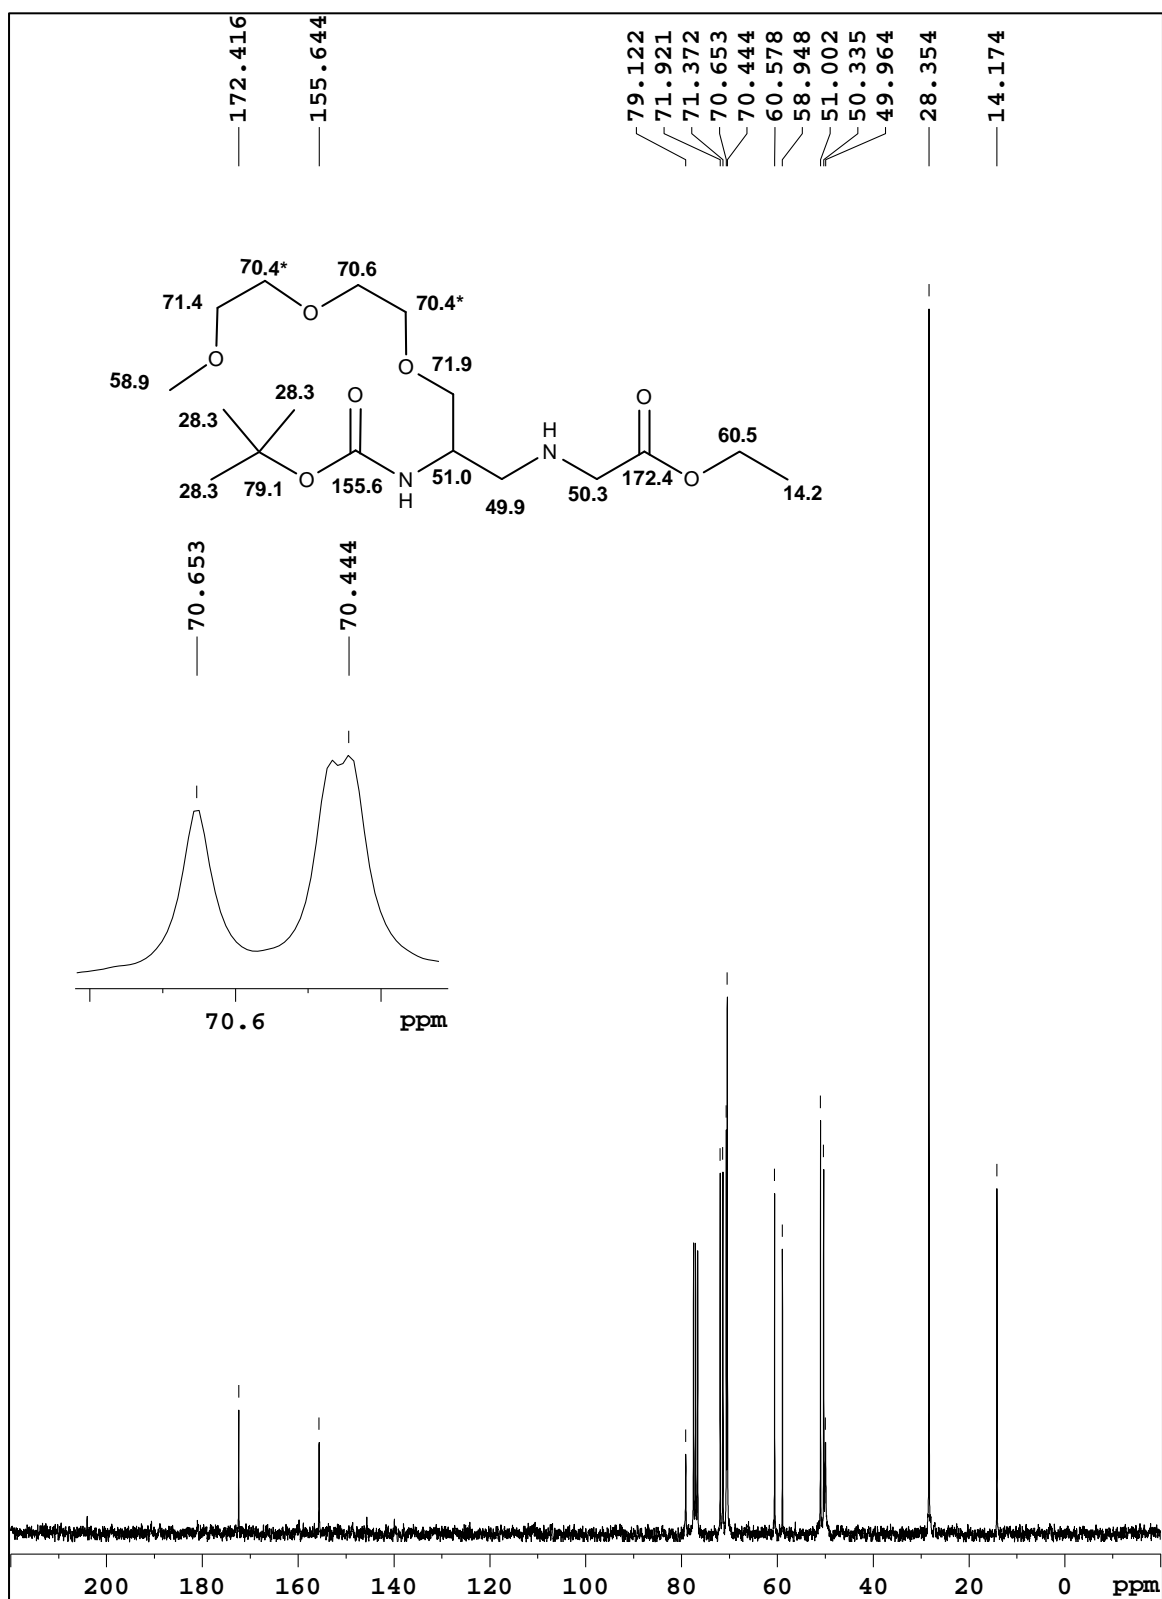

\* Peaks are merged together

**Figure S10.**  $^1\text{H-NMR}$  of Boc-(2-(2-methoxyethoxy)ethyl)-L-serine thymine ethyl ester (**6a**)

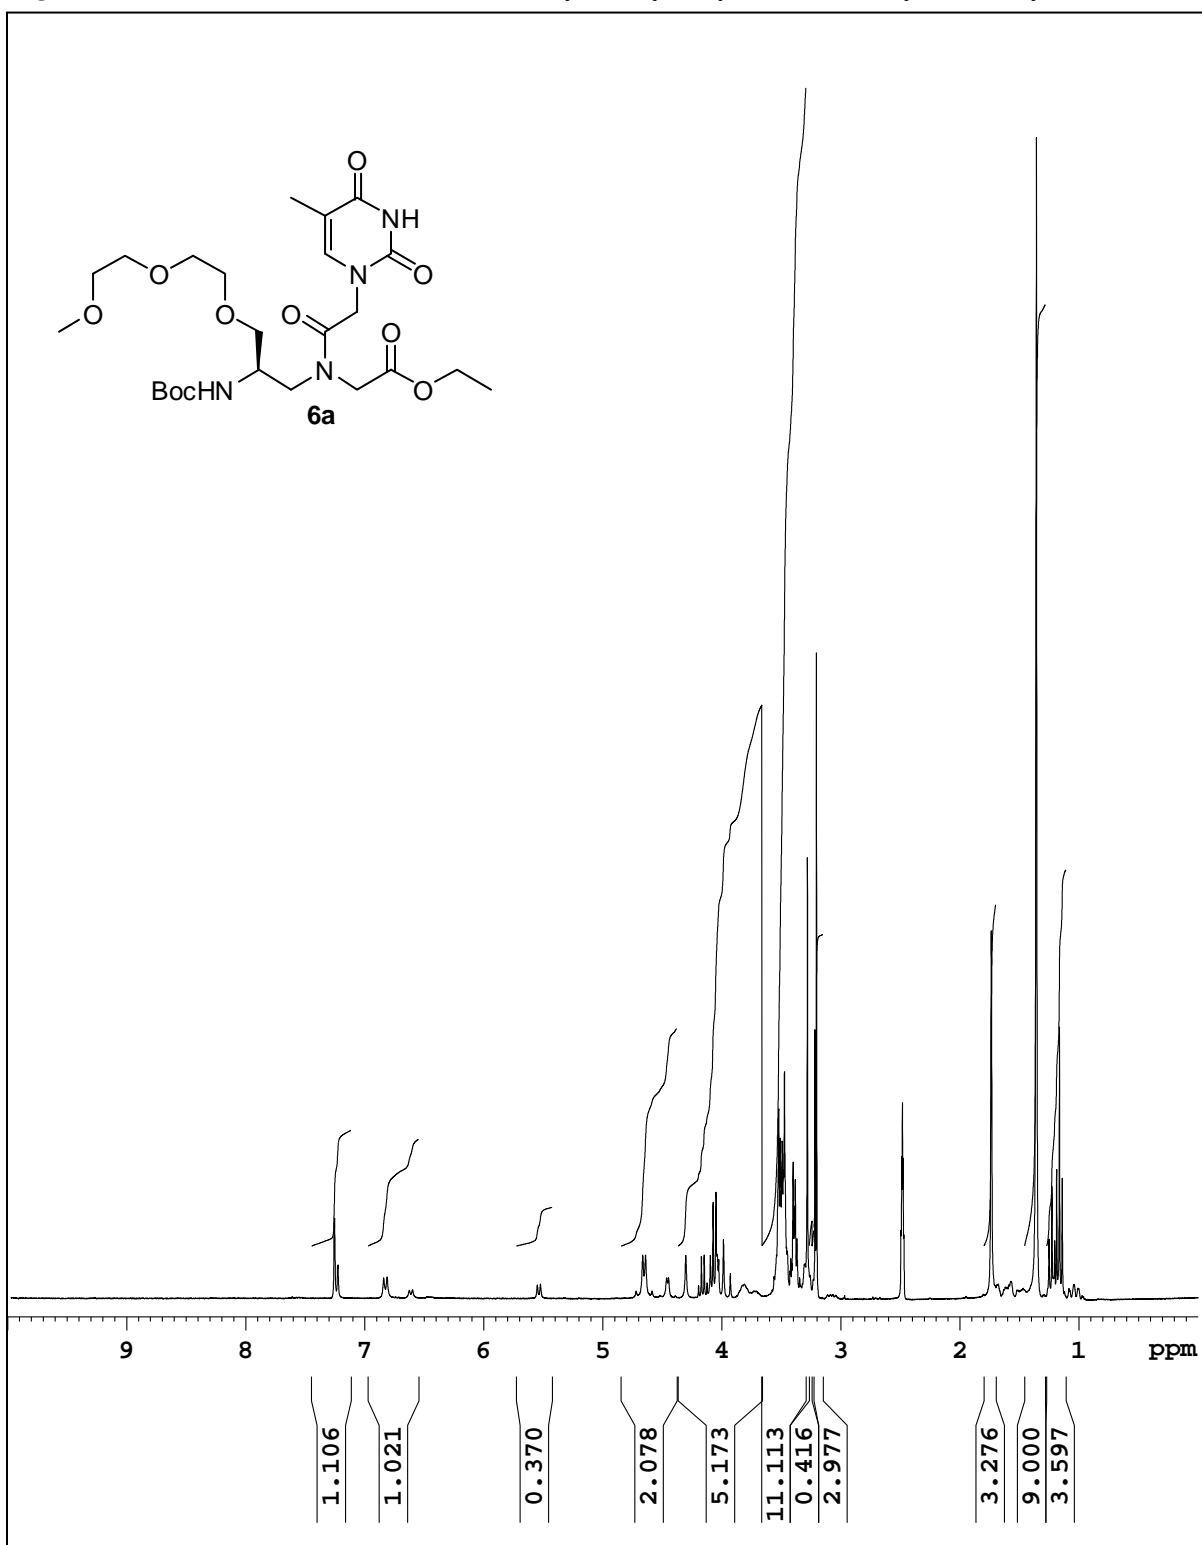

Figure S11.  $^{13}\text{C}$ -NMR of Boc-(2-(2-methoxyethoxy)ethyl)-L-serine thymine ethyl ester (**6a**)

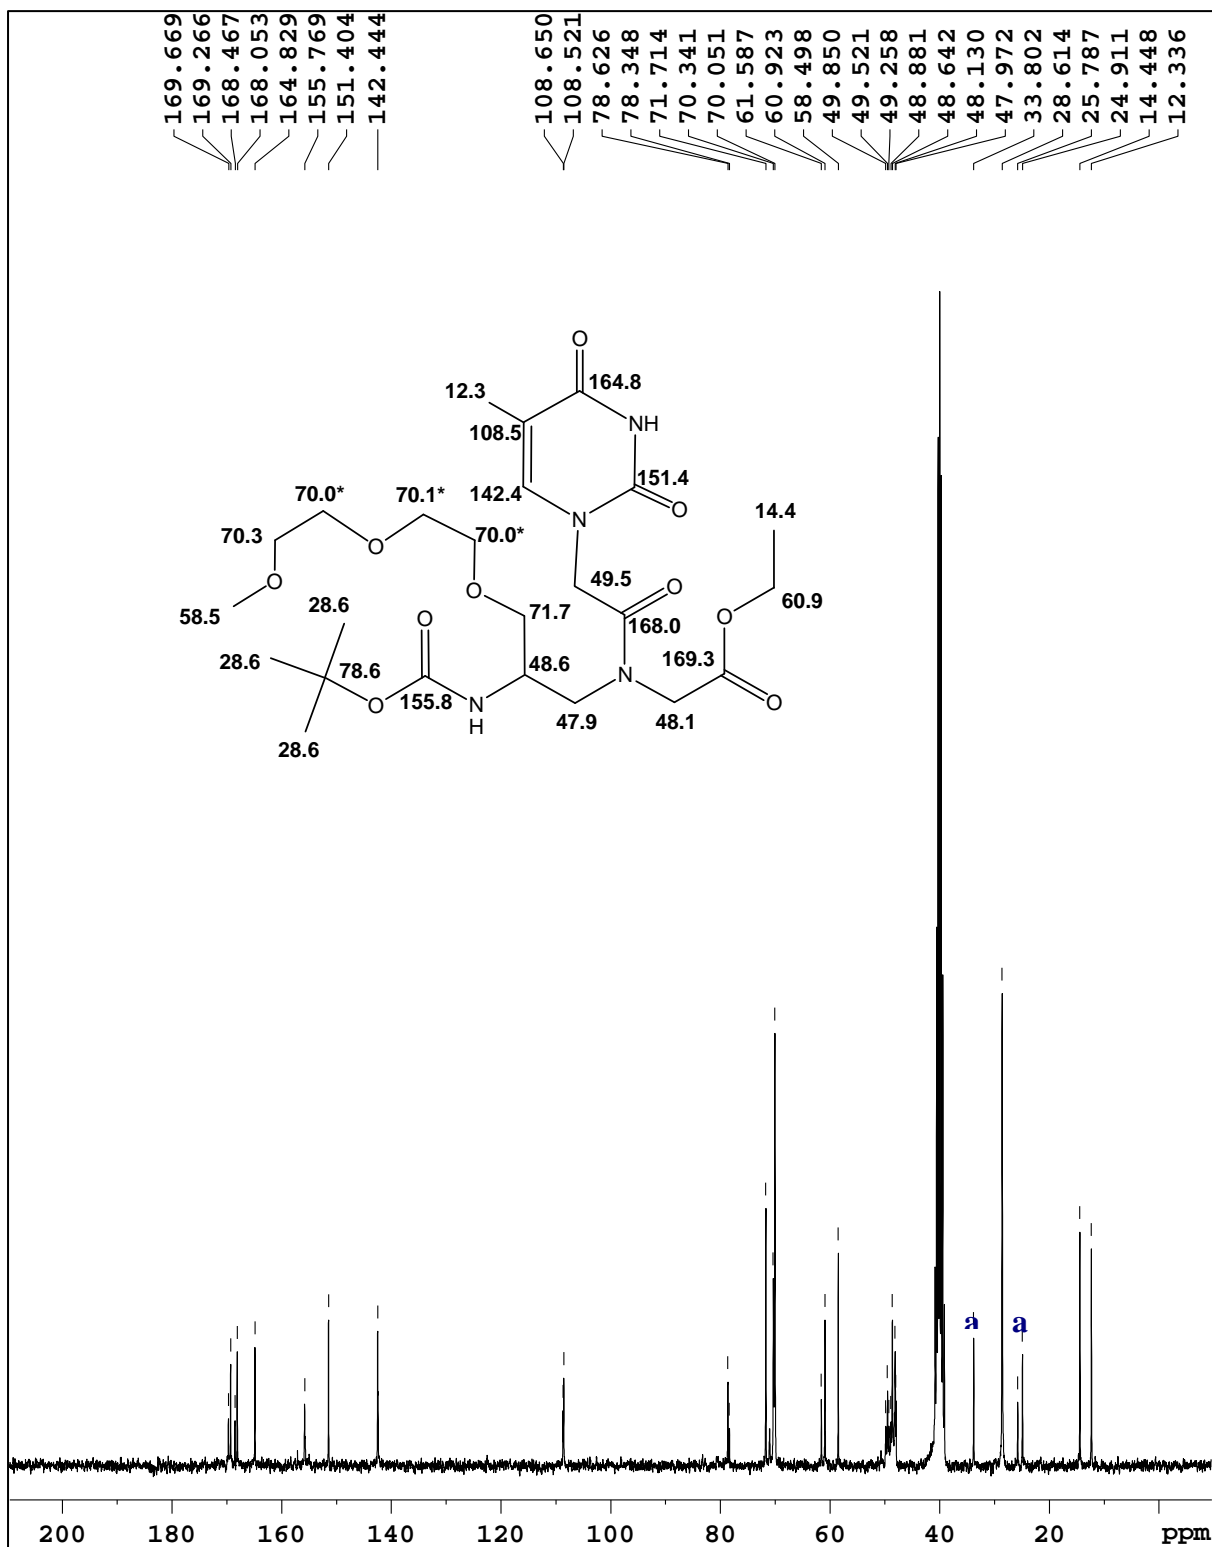

\* Peaks are merged together

a Impurity peak

**Figure S12.**  $^1\text{H-NMR}$  of Boc-(2-(2-methoxyethoxy)ethyl)-L-serine Adenine(Cbz) ethyl ester (**6b**)

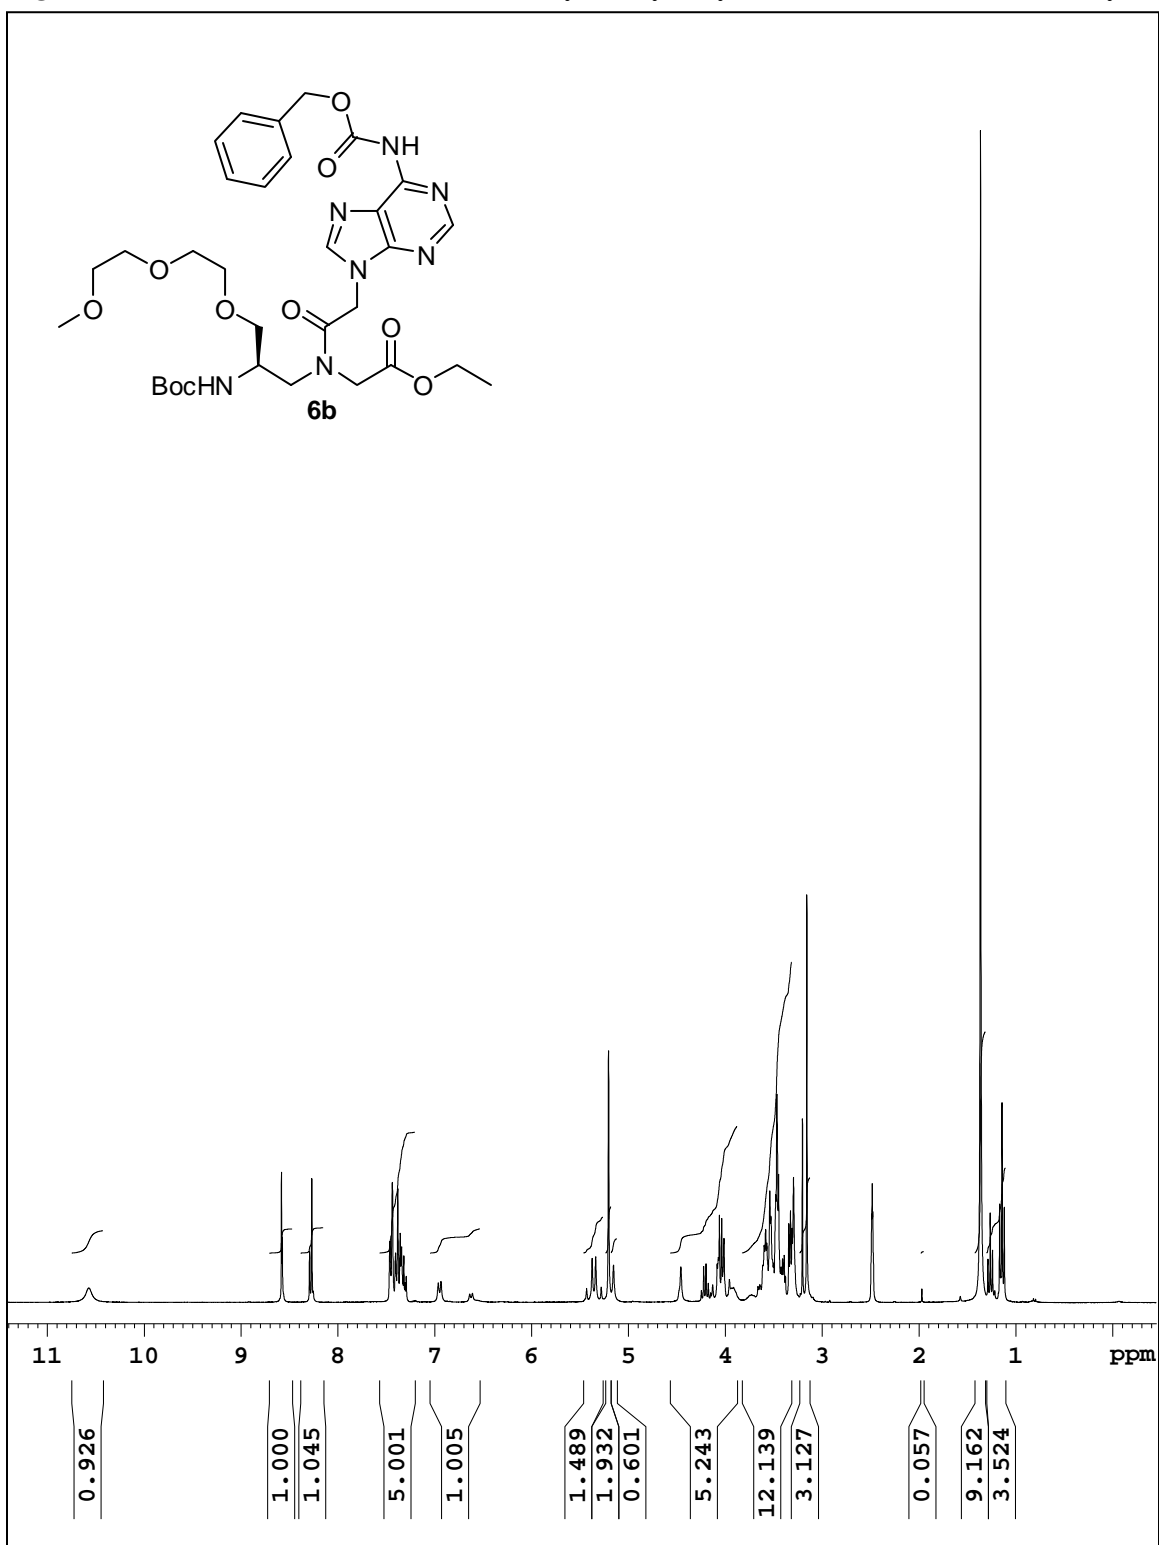

Figure S13.  $^{13}\text{C}$ -NMR of Boc-(2-(2-methoxyethoxy)ethyl)-L-serine Adenine(Cbz) ethyl ester (**6b**)

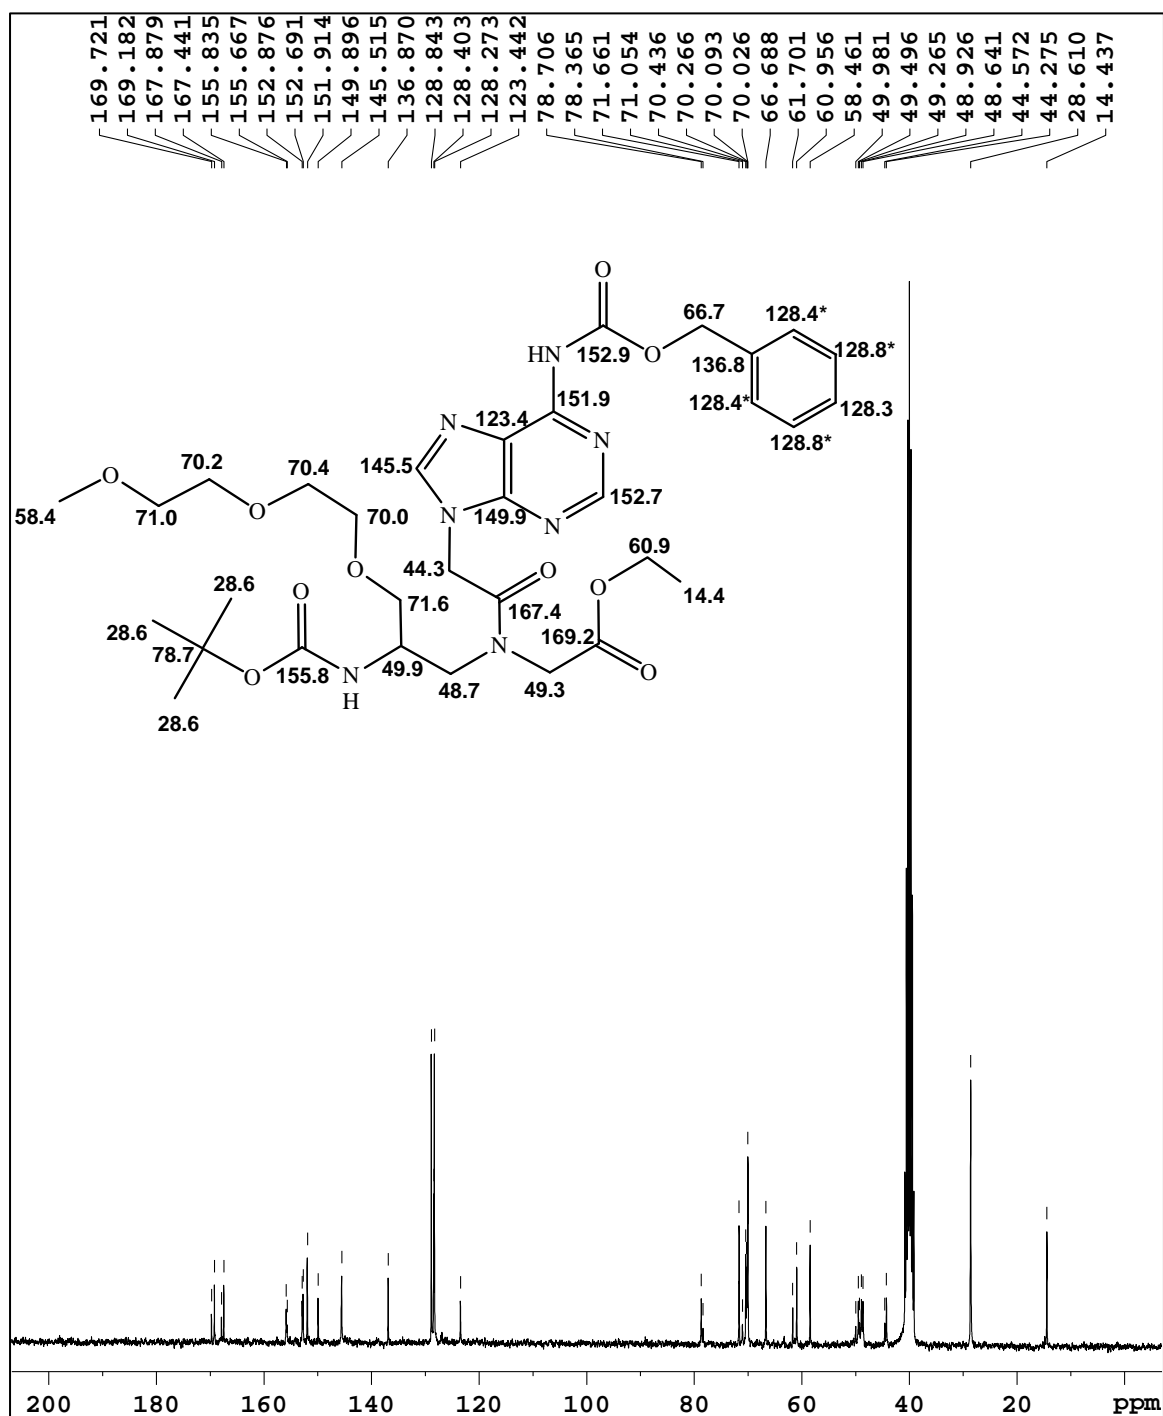

\* Peaks are merged together

Figure S14. <sup>1</sup>H-NMR of Boc-(2-(2-methoxyethoxy)ethyl)-L-serine Guanine(Cbz) ethyl ester (**6c**)

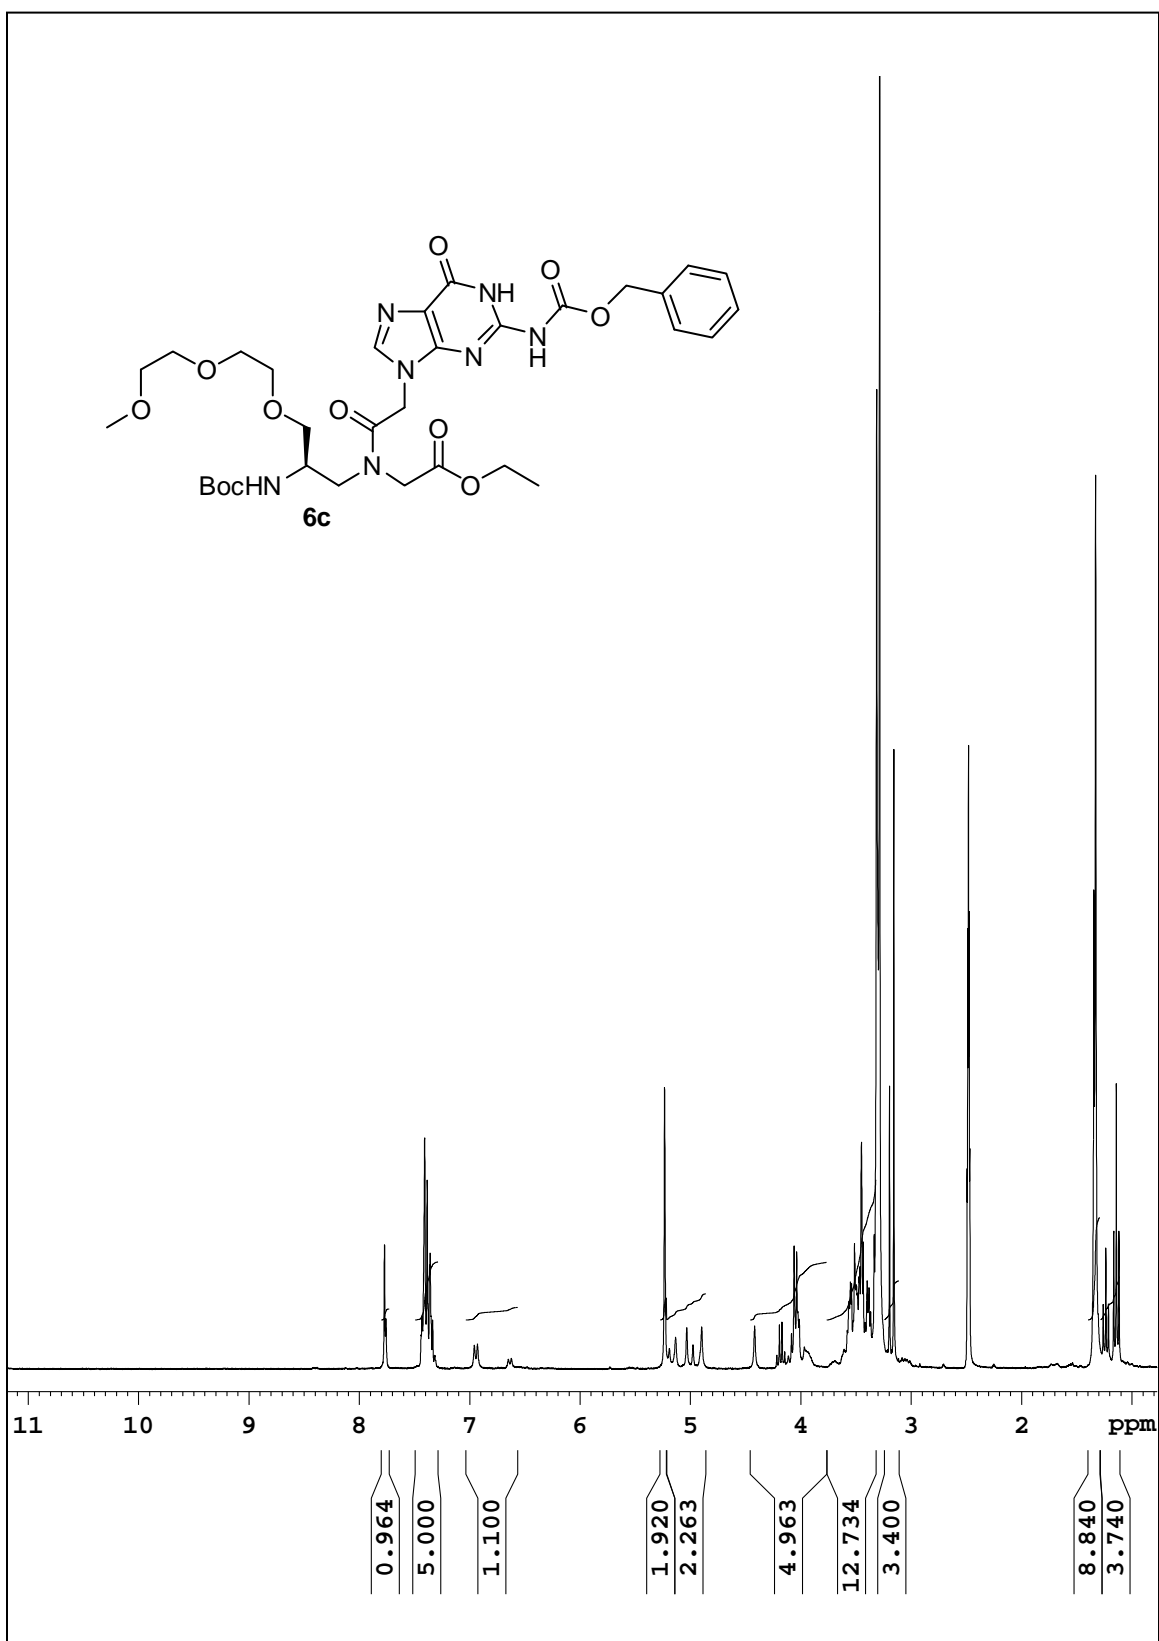



Figure S15.  $^{13}\text{C}$ -NMR of Boc-(2-(2-methoxyethoxy)ethyl)-L-serine Guanine(Cbz) ethyl ester (**6c**)

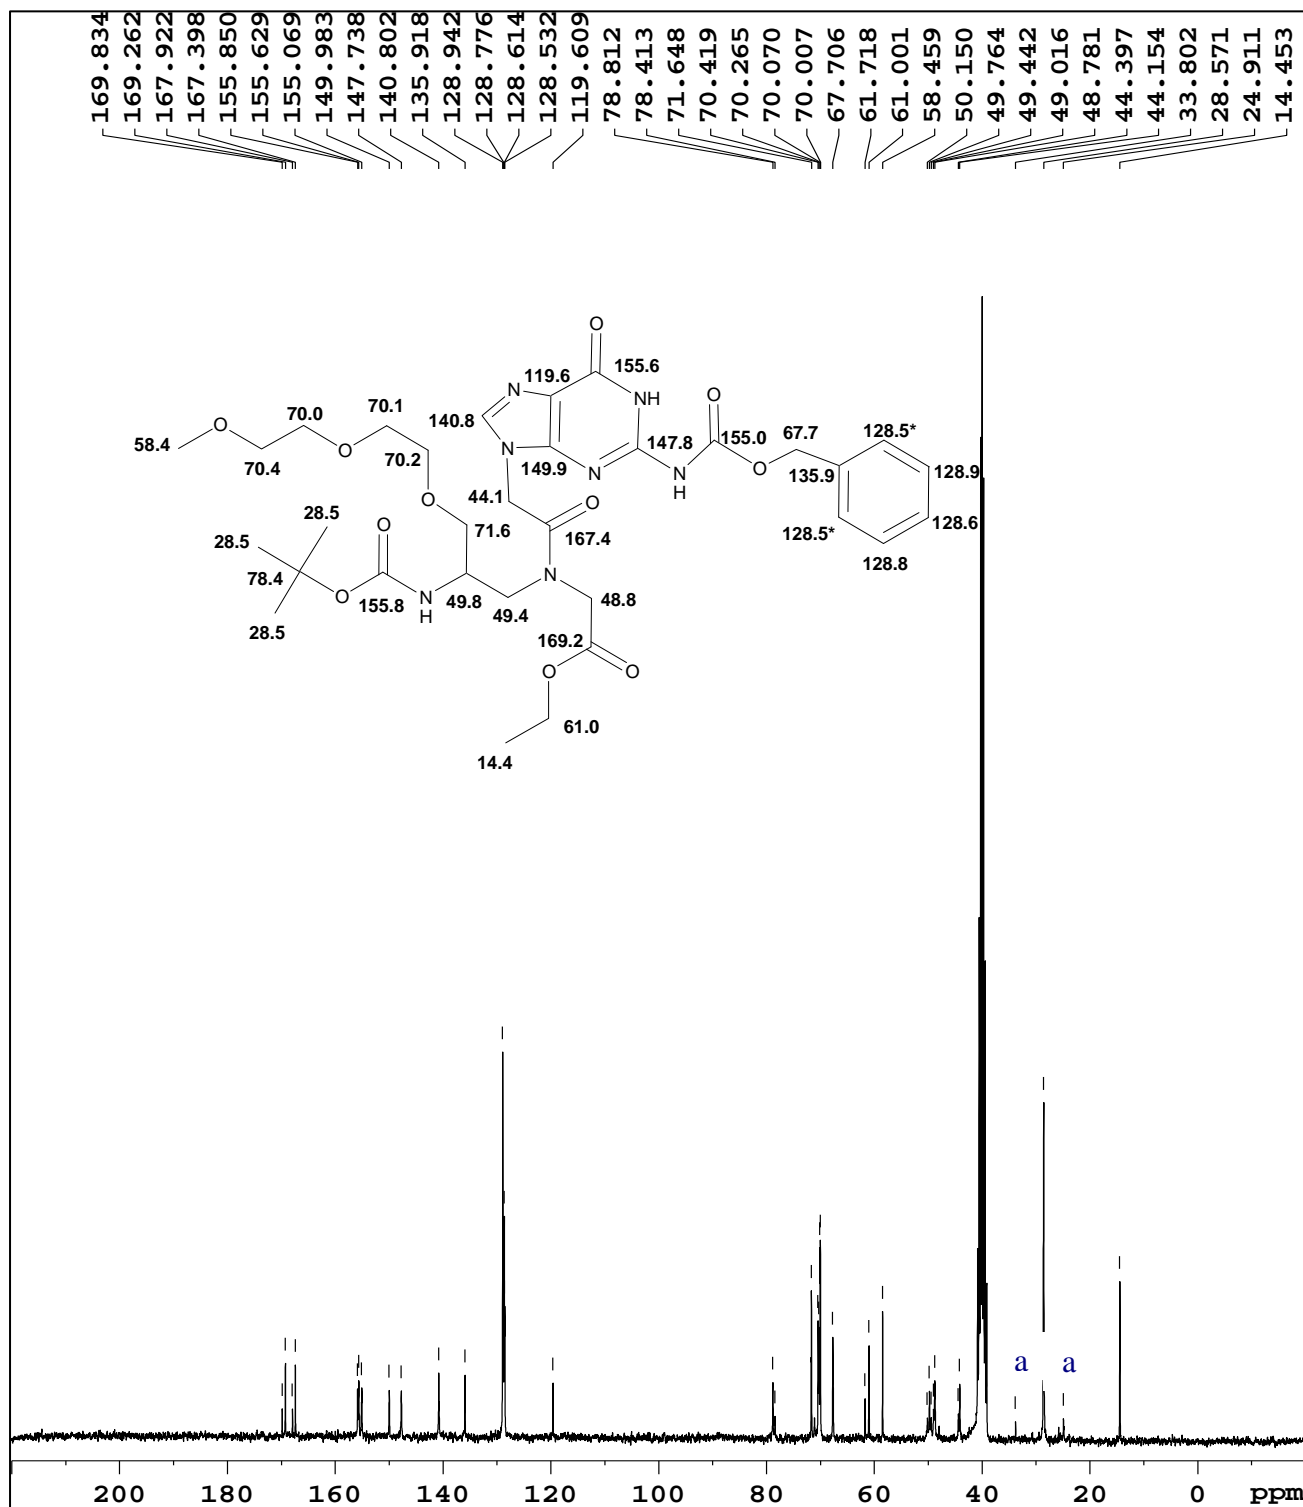

\* Peaks are merged together  
a Impurity peak

**Figure S16.**  $^1\text{H}$  NMR of Boc-(2-(2-methoxyethoxy)ethyl)-L-serine Cytosine(Cbz) ethyl ester (**6d**)

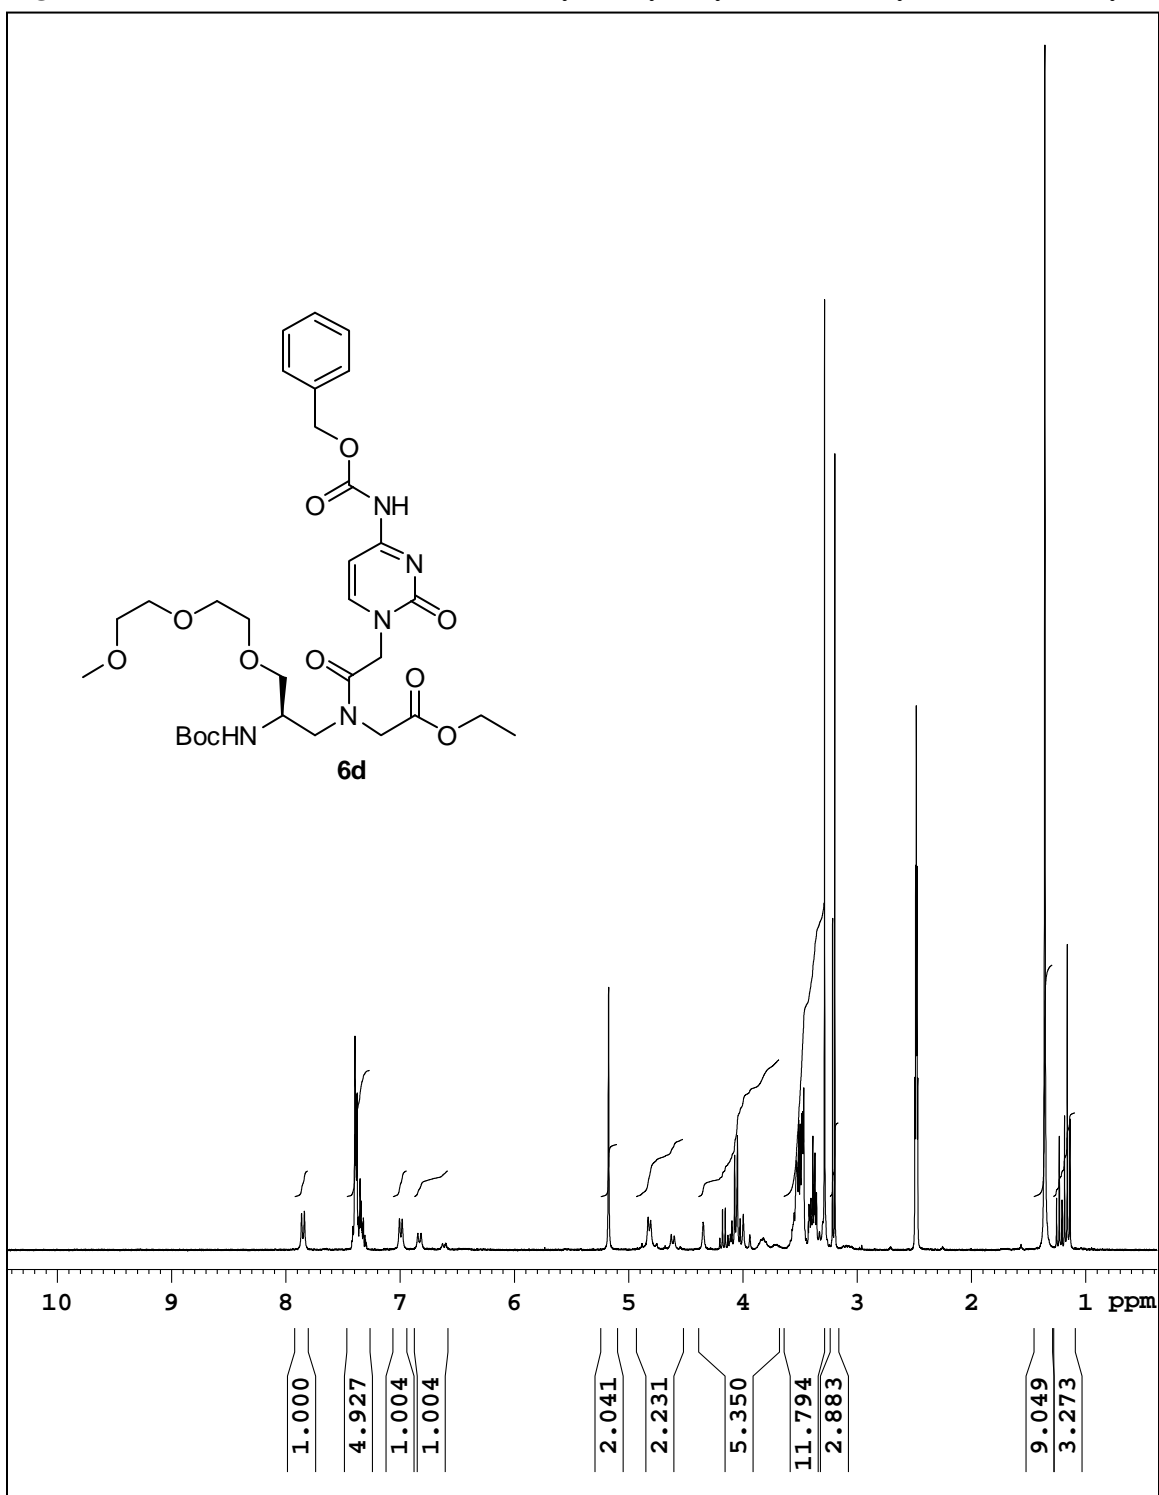

Figure S17.  $^{13}\text{C}$ -NMR of Boc-(2-(2-methoxyethoxy)ethyl)-L-serine Cytosine(Cbz) ethyl ester (**6d**)

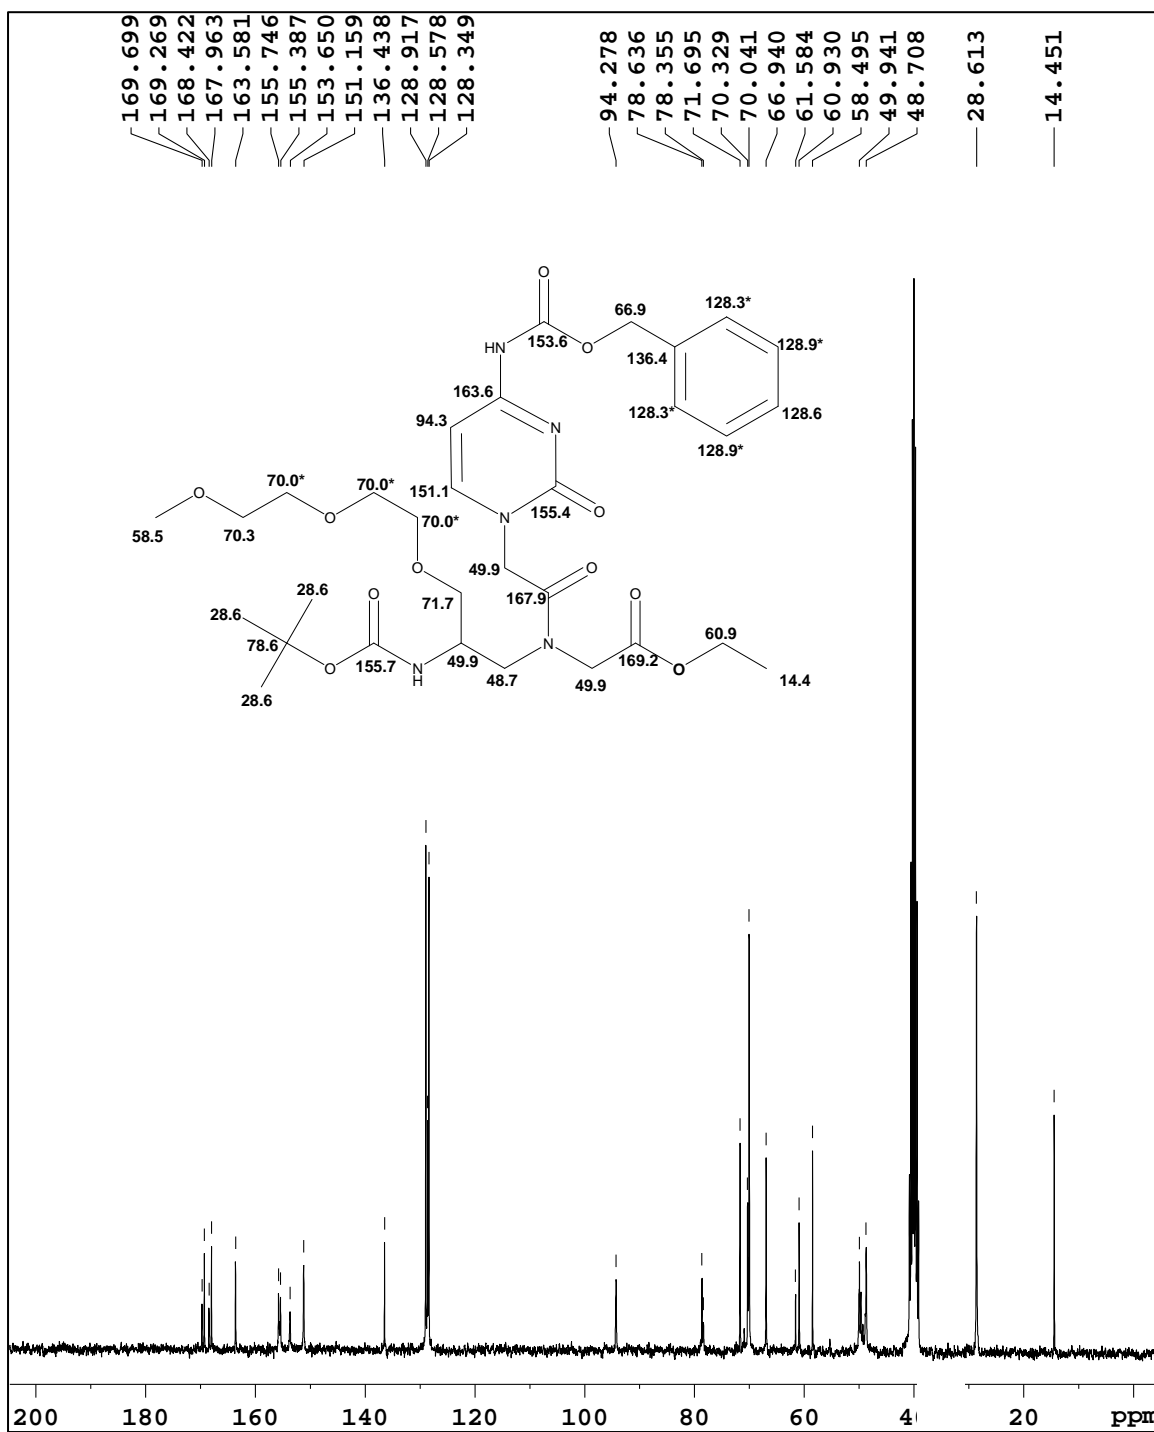

\* Peaks are merged together

**Figure S18.**  $^1\text{H-NMR}$  of Boc-(2-(2-methoxyethoxy)ethyl)-L-serine Thymine monomer (**7a**)

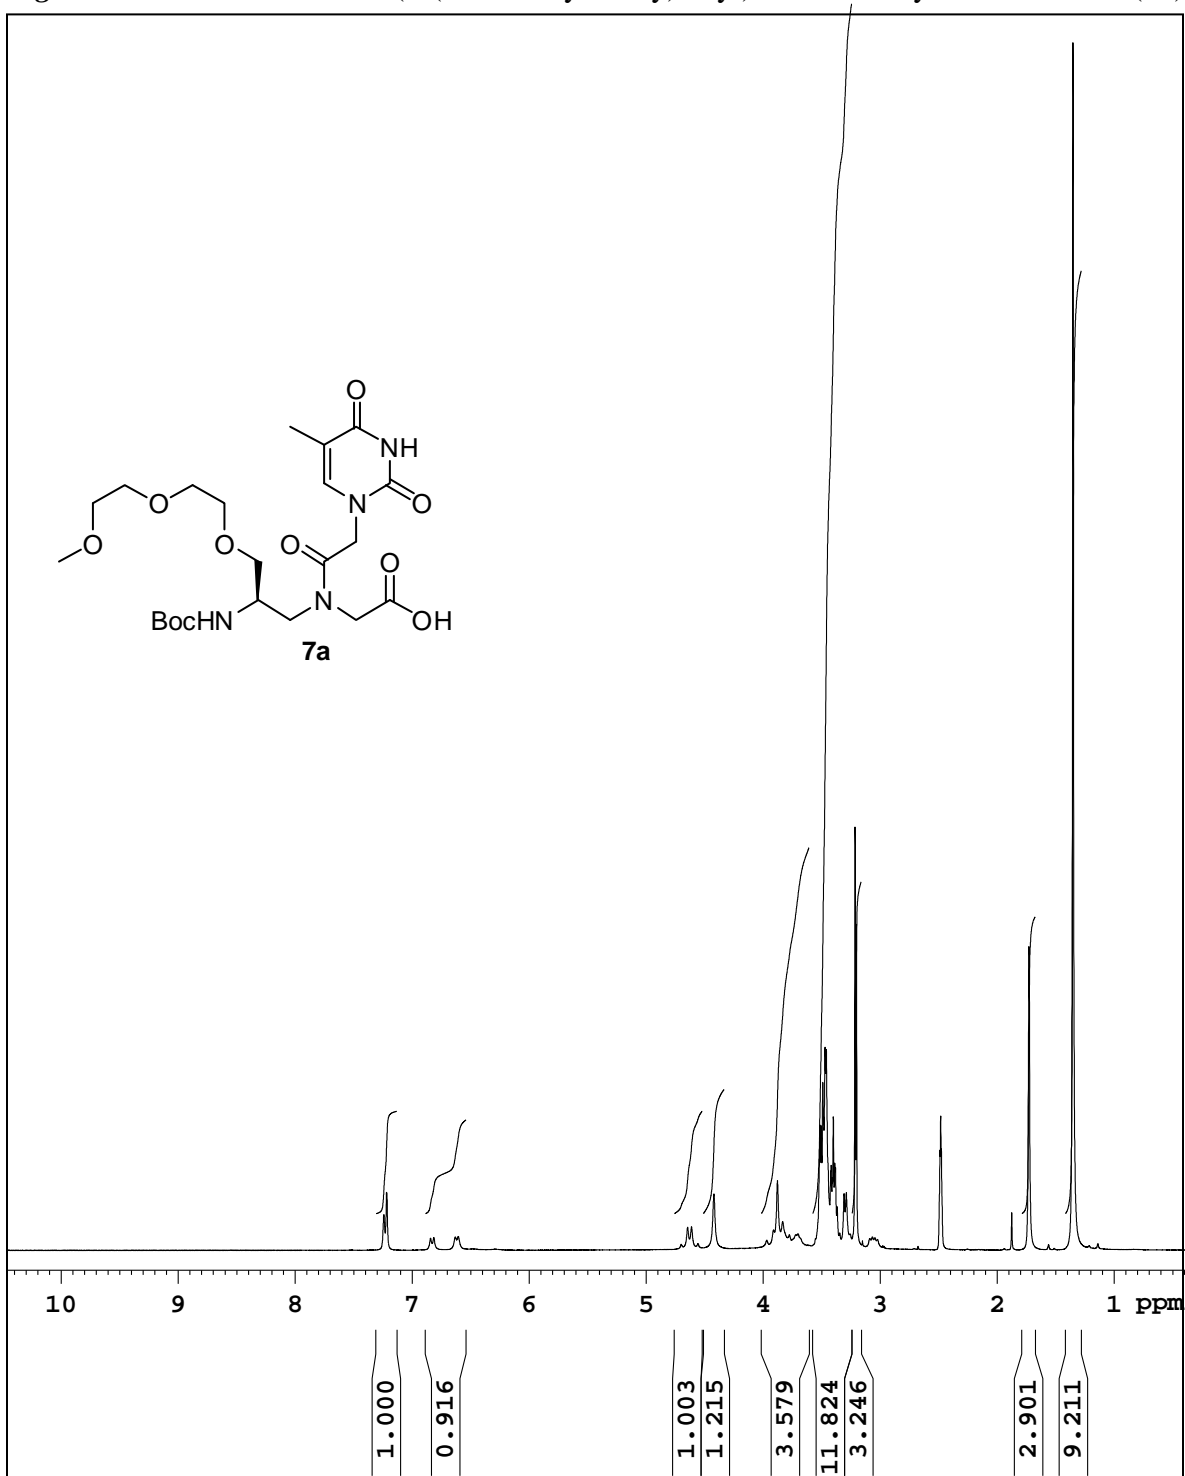

**Figure S19.**  $^{13}\text{C}$ -NMR of Boc-(2-(2-methoxyethoxy)ethyl)-L-serine Thymine monomer (**7a**)

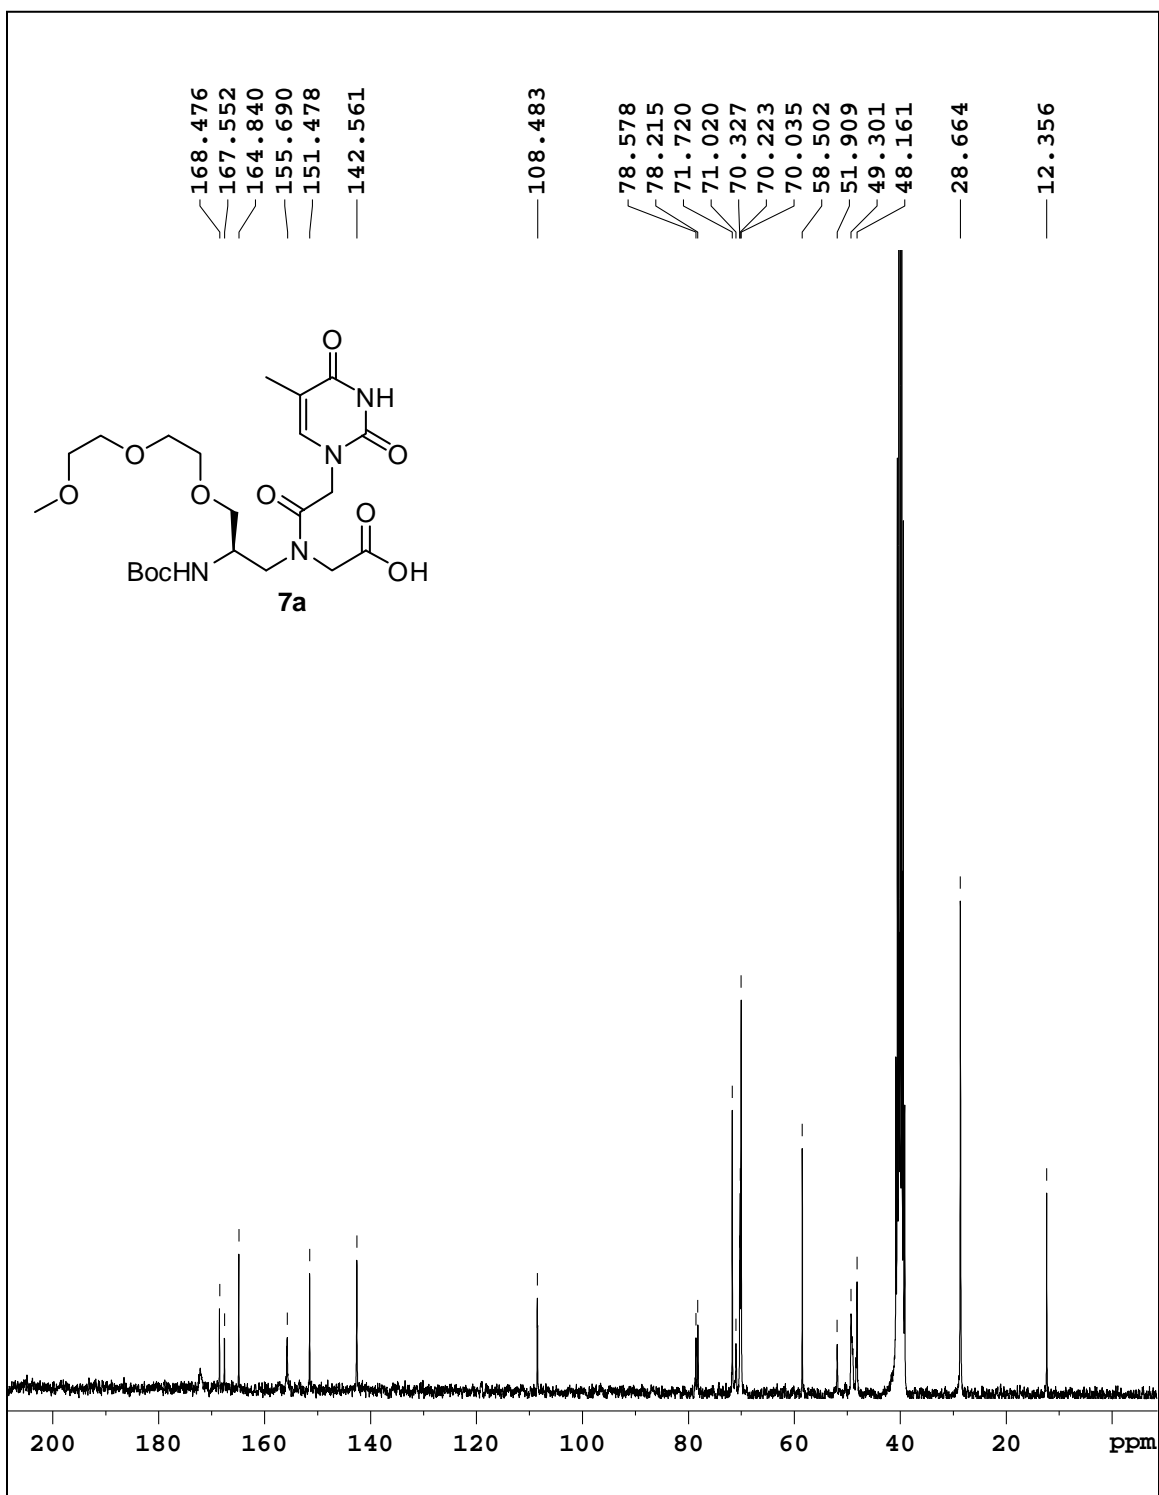

**Figure S20.**  $^1\text{H-NMR}$  of Boc-(2-(2-methoxyethoxy)ethyl)-L-serine Adenine(Cbz) monomer (**7b**)

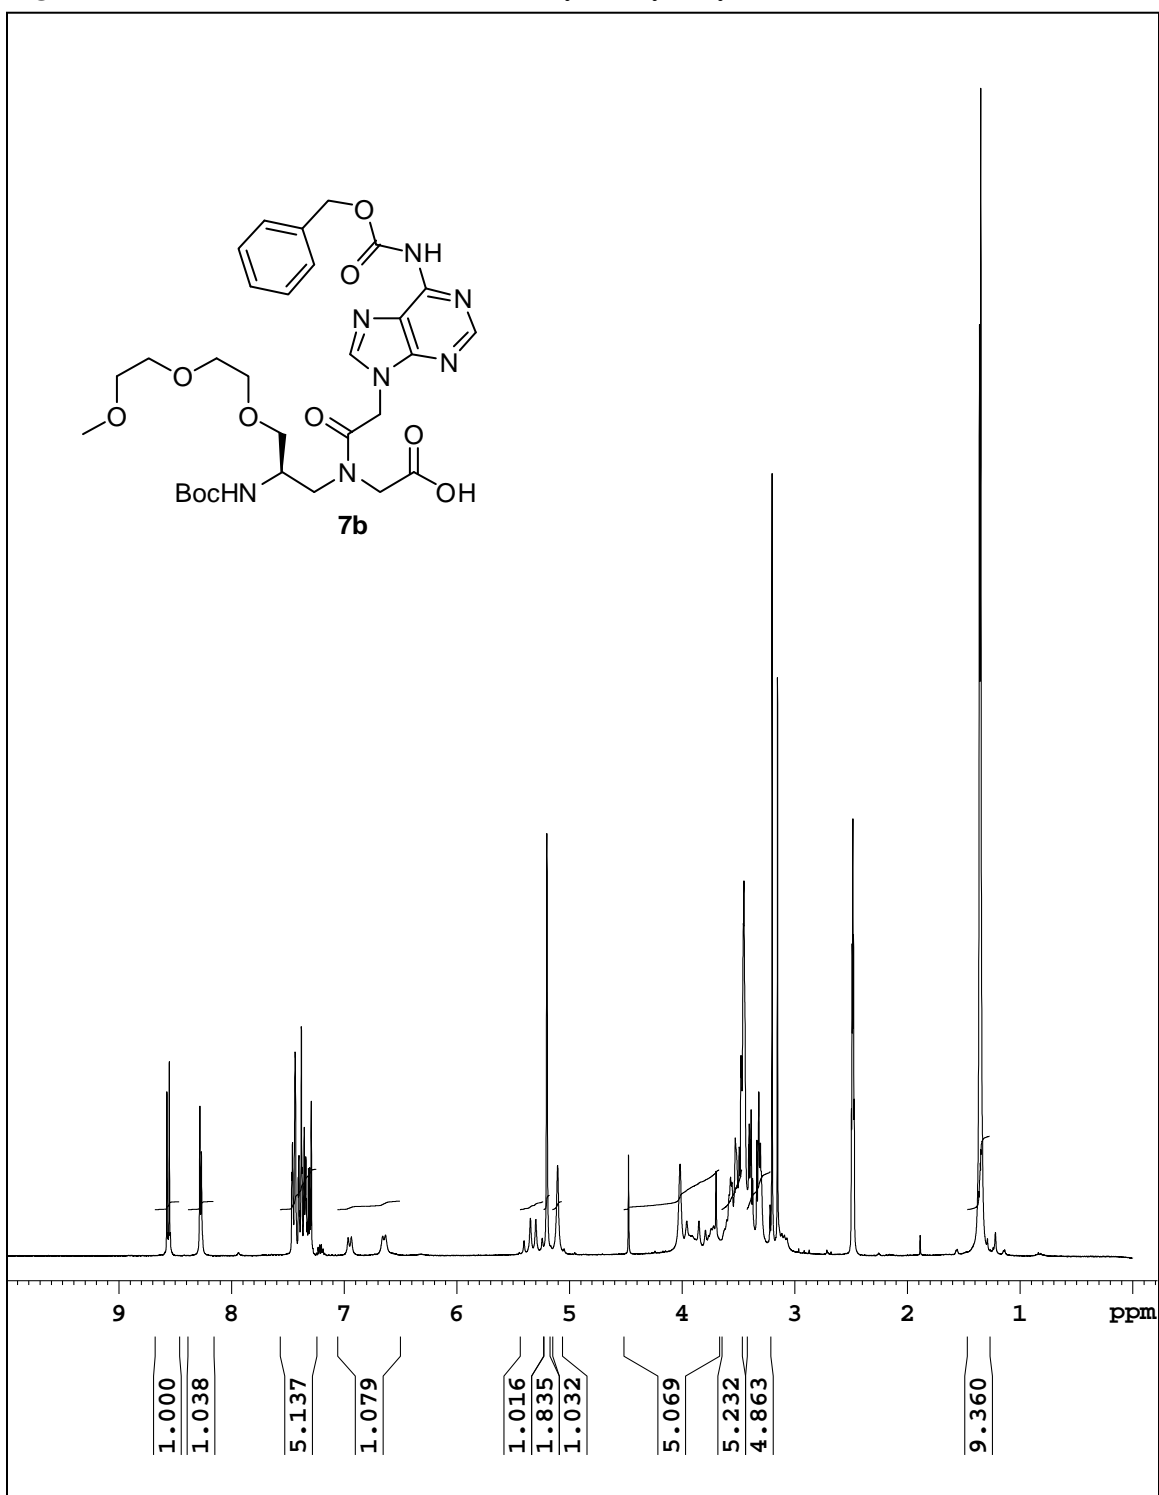

Figure S21.  $^{13}\text{C}$ -NMR of Boc-(2-(2-methoxyethoxy)ethyl)-L-serine Adenine(Cbz) monomer (**7b**)

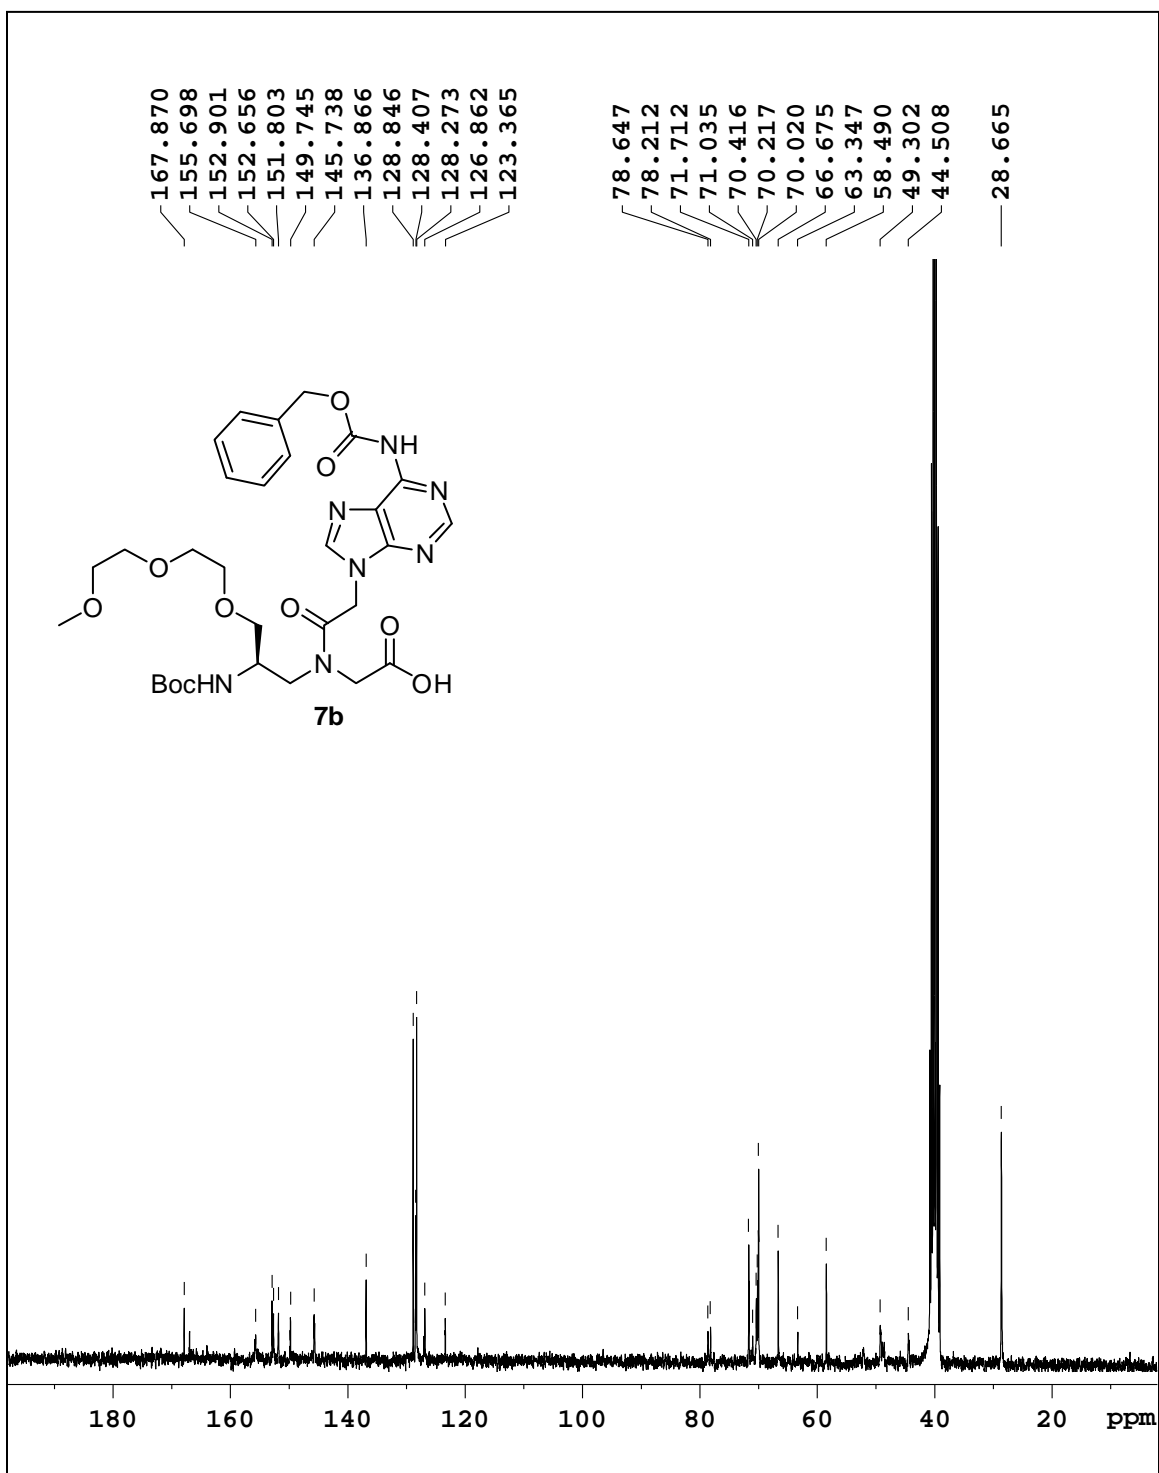

**Figure S22.**  $^1\text{H}$  NMR of Boc-(2-(2-methoxyethoxy)ethyl)-L-serine Guanine(Cbz) monomer (**7c**)

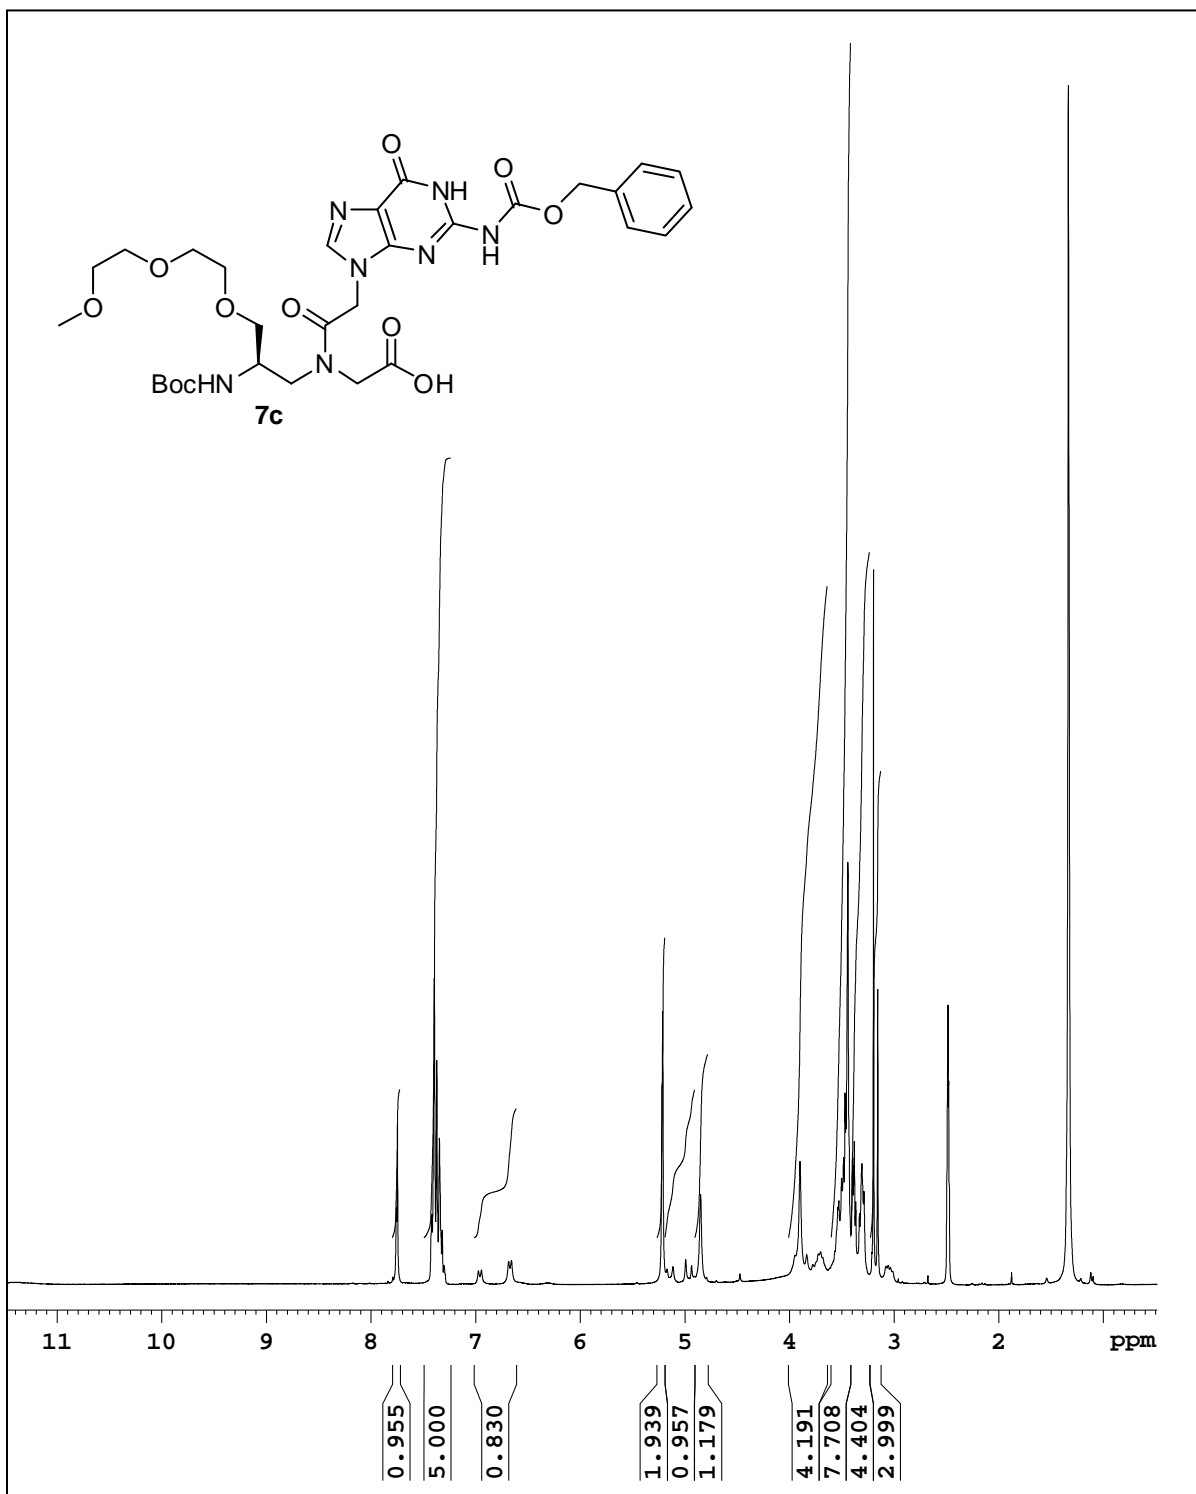



Figure S23.  $^{13}\text{C}$ -NMR of Boc-(2-(2-methoxyethoxy)ethyl)-L-serine Guanine(Cbz) monomer (7c)

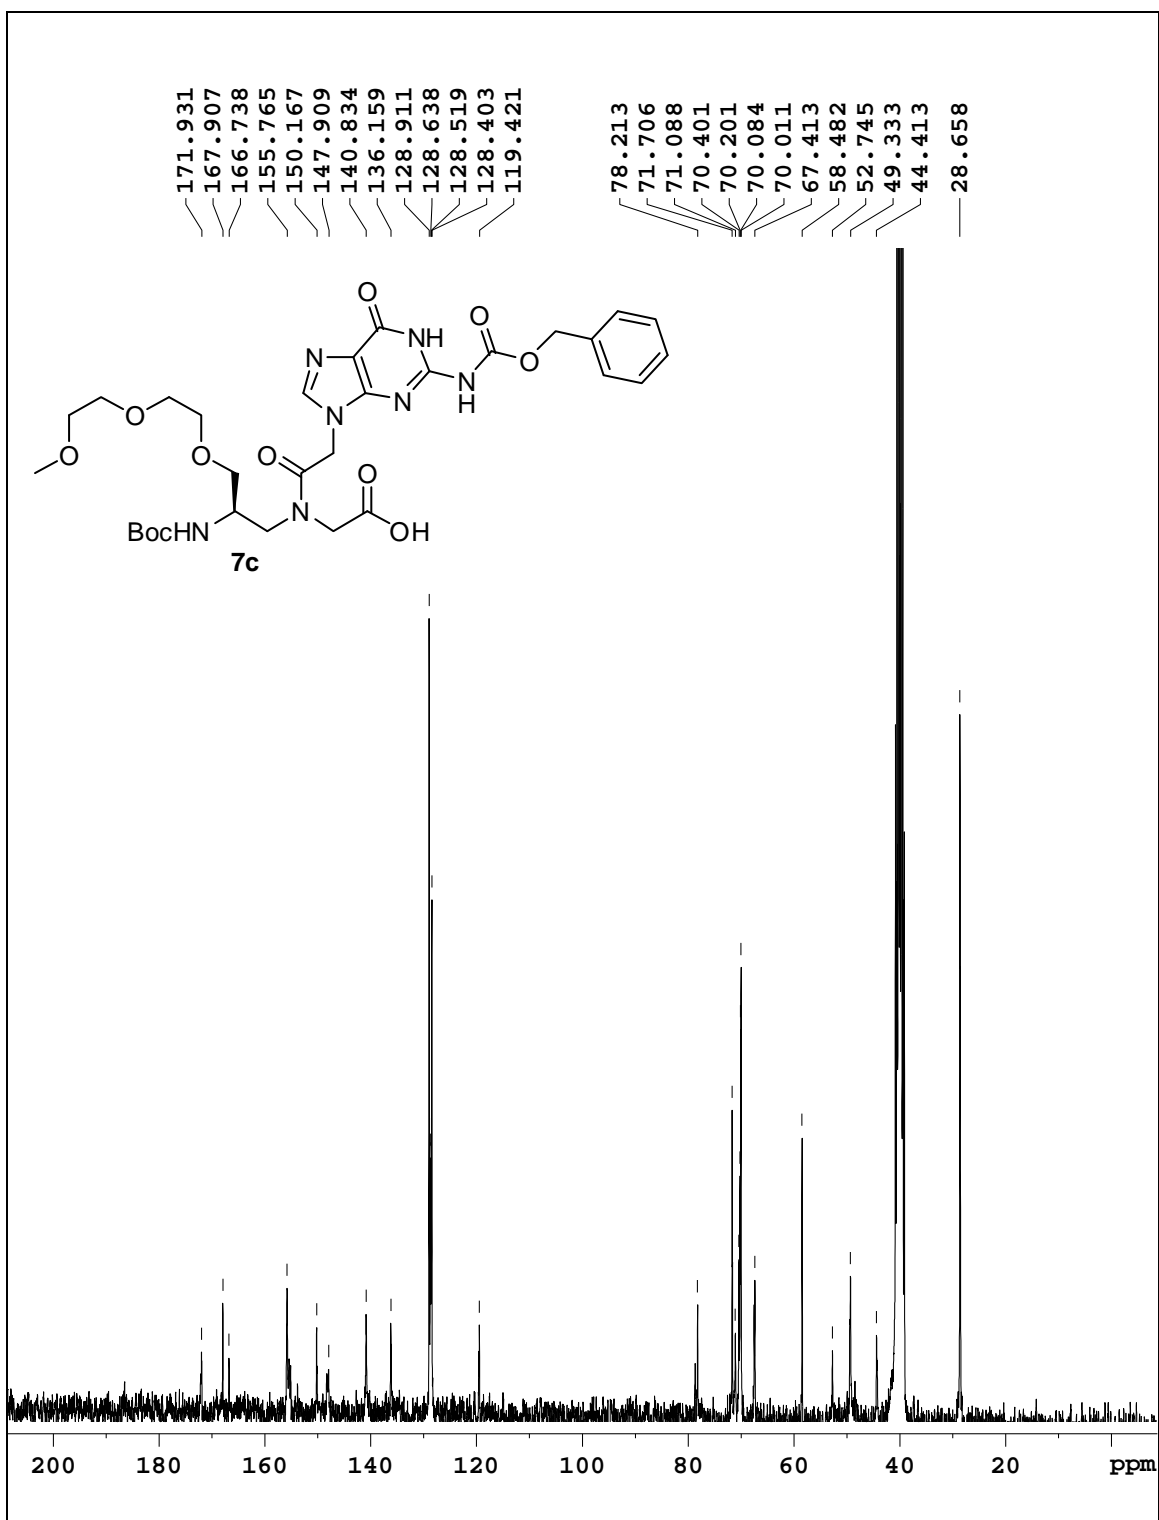

**Figure S24.**  $^1\text{H-NMR}$  of Boc-(2-(2-methoxyethoxy)ethyl)-L-serine Cytosine(Cbz) monomer (**7d**)

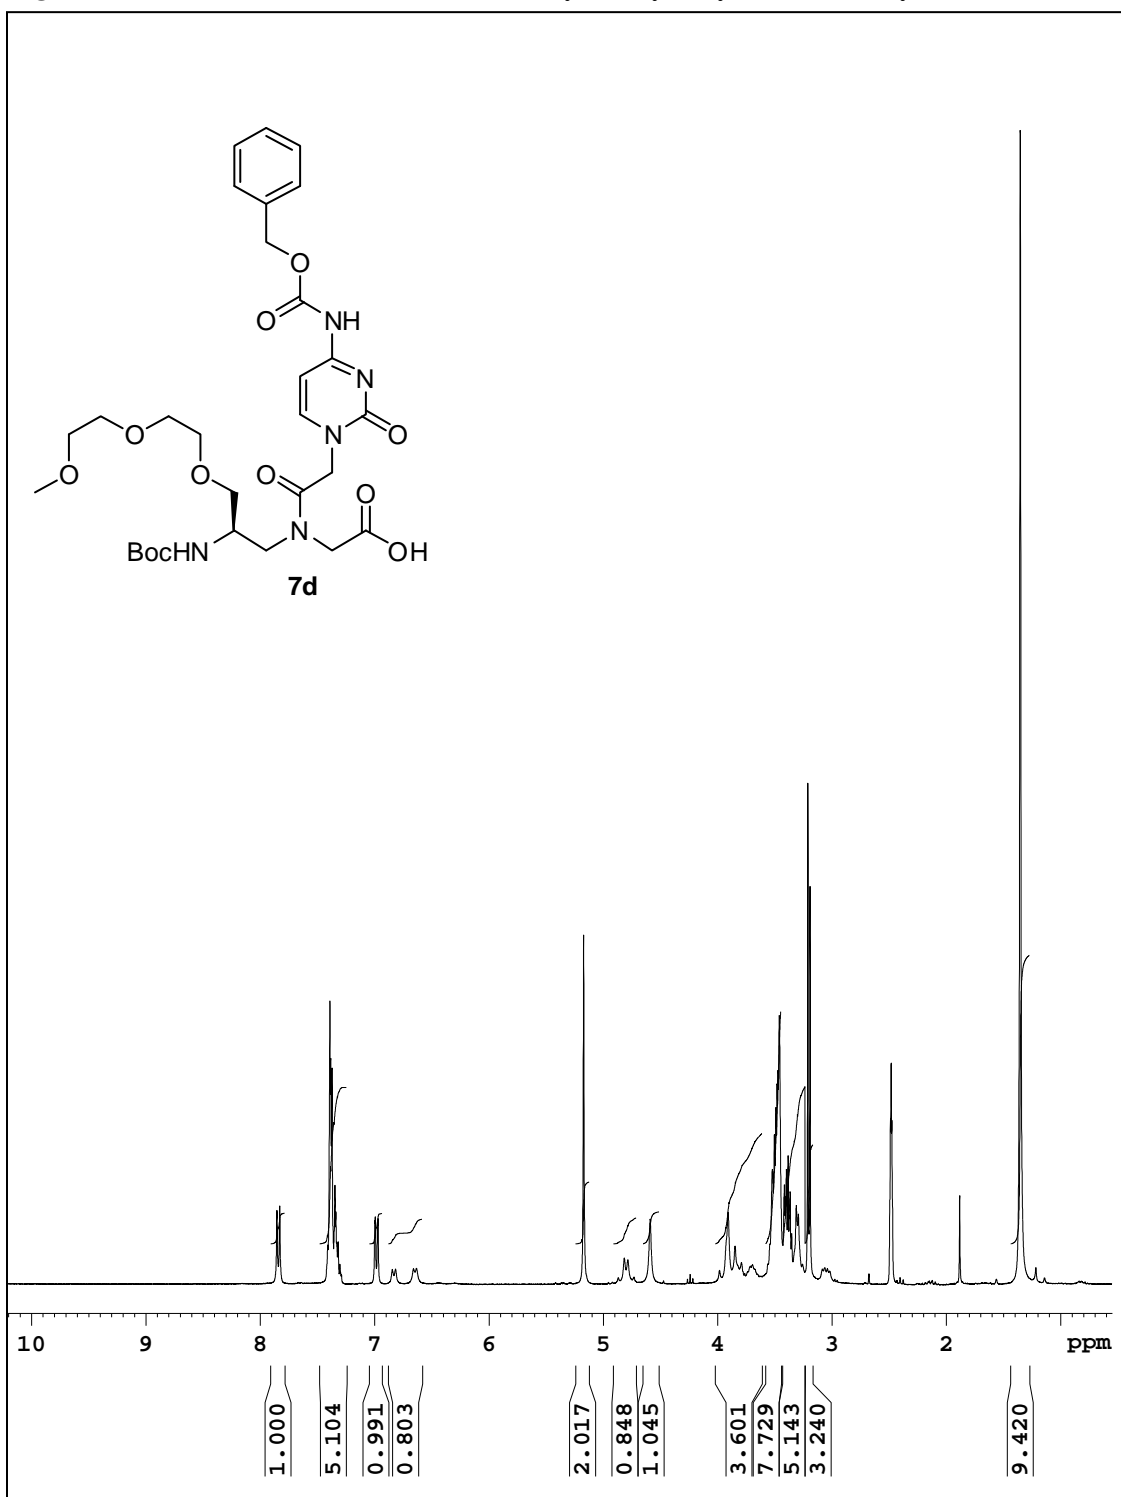

Figure S25.  $^{13}\text{C}$ -NMR of Boc-(2-(2-methoxyethoxy)ethyl)-L-serine Cytosine(Cbz) monomer (7d)

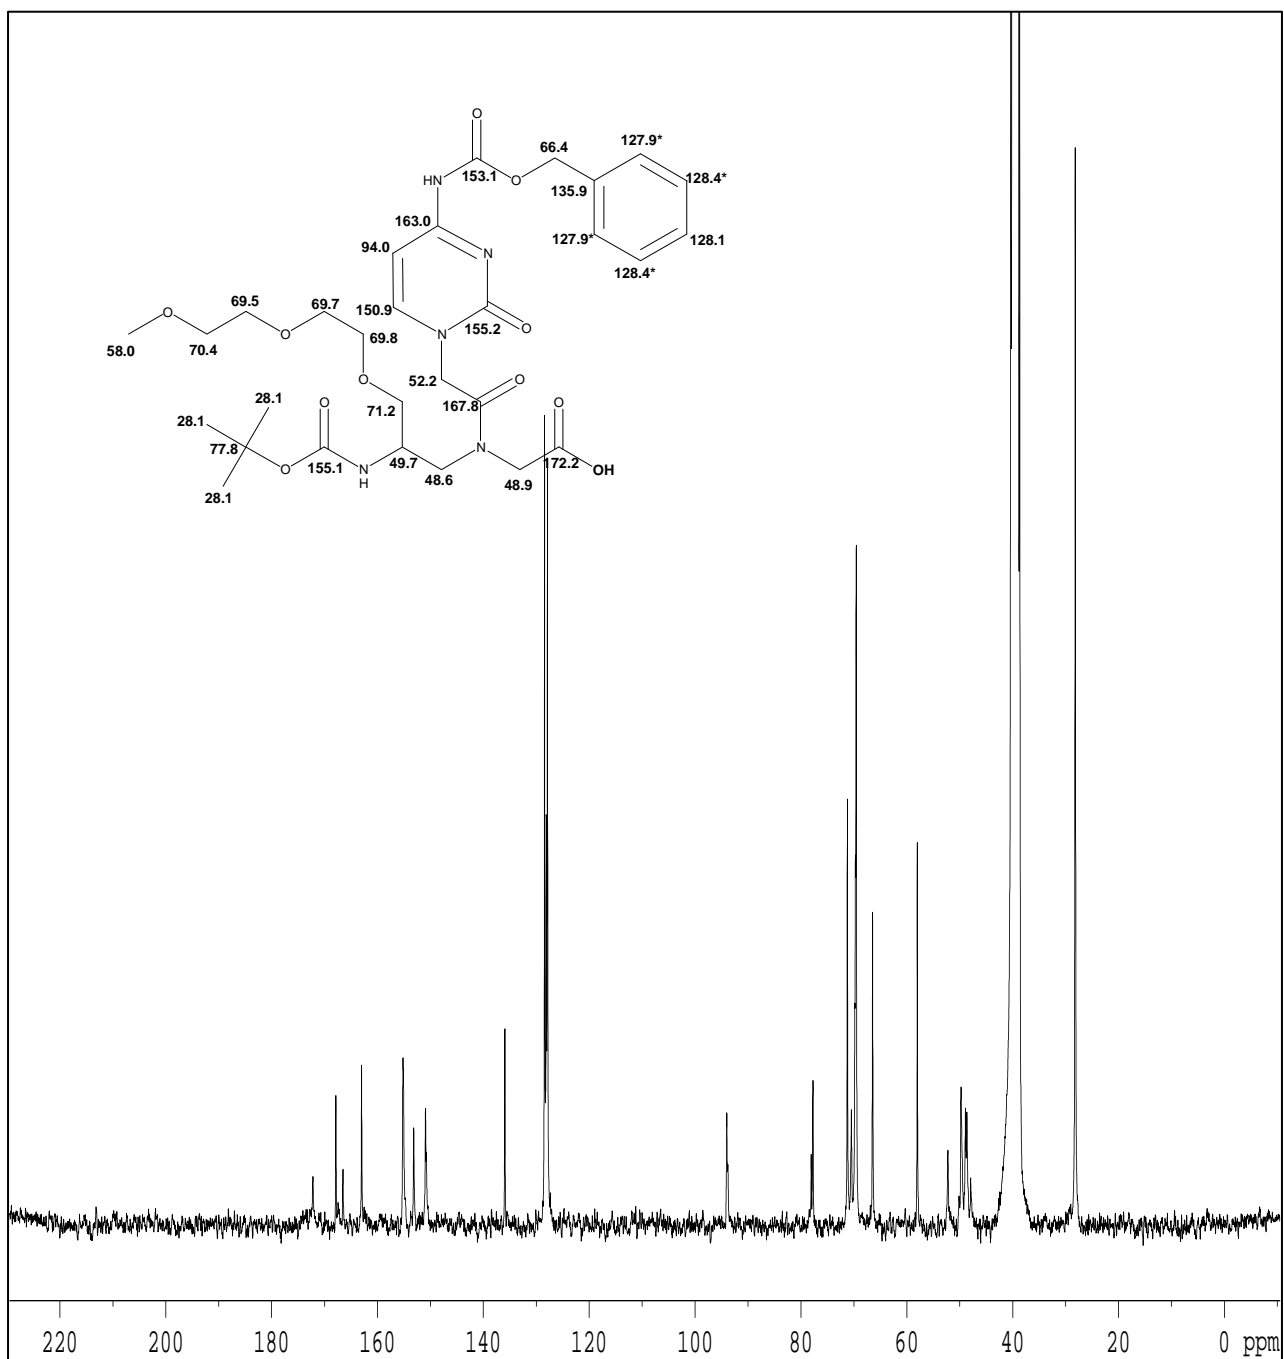

\* Peaks are merged together

**Figure S26.**  $^1\text{H-NMR}$  of 3-[2-(2-methoxy-ethoxy)-ethoxy]-2-(3,3,3-trifluoro-2-methoxy-2-phenyl-propionylamino)-propionic acid (**8**).

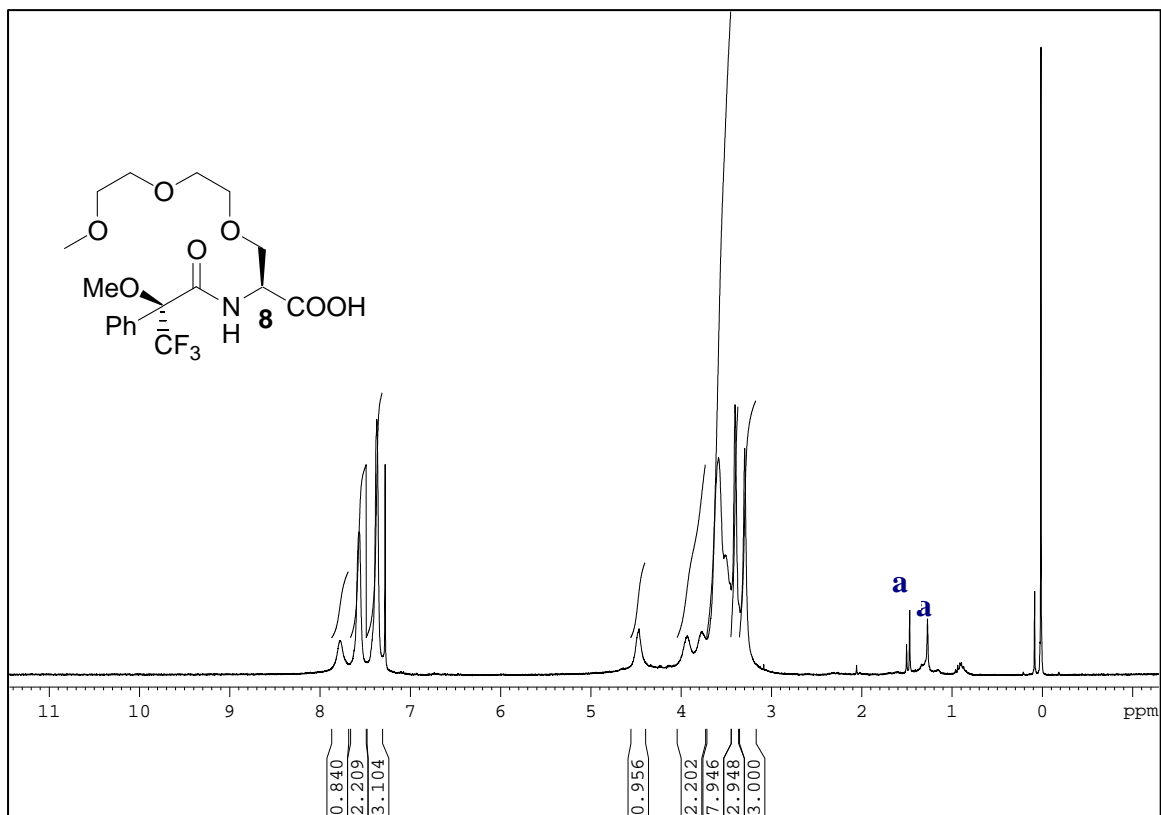

**a** Impurity peaks

**Figure S27.**  $^{13}\text{C}$ -NMR of 3-[2-(2-methoxy-ethoxy)-ethoxy]-2-(3,3,3-trifluoro-2-methoxy-2-phenyl-propionylamino)-propionic acid (**8**).

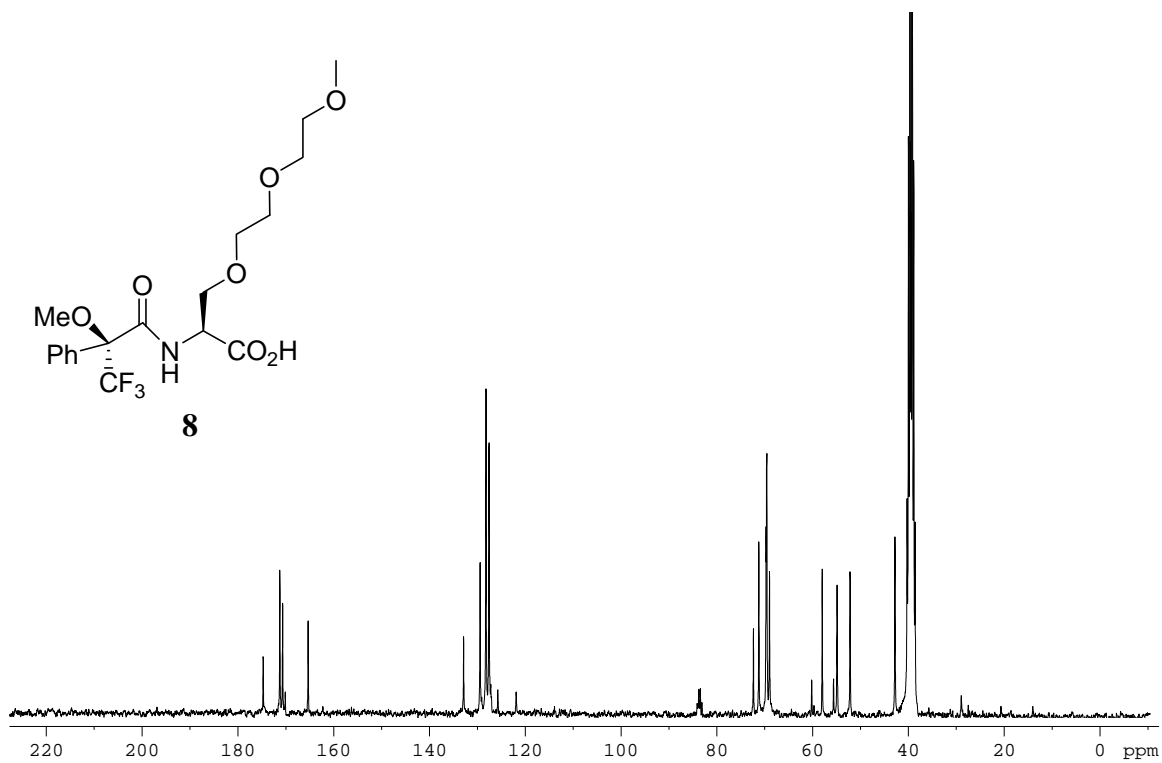

**Figure S28.**  $^1\text{H-NMR}$  of 3,3,3-trifluoro-*N*-{2-hydroxy-1-[2-(2-methoxy-ethoxy)-ethoymethyl]-ethyl}-2-methoxy-2-phenyl-propionamide (**9**).

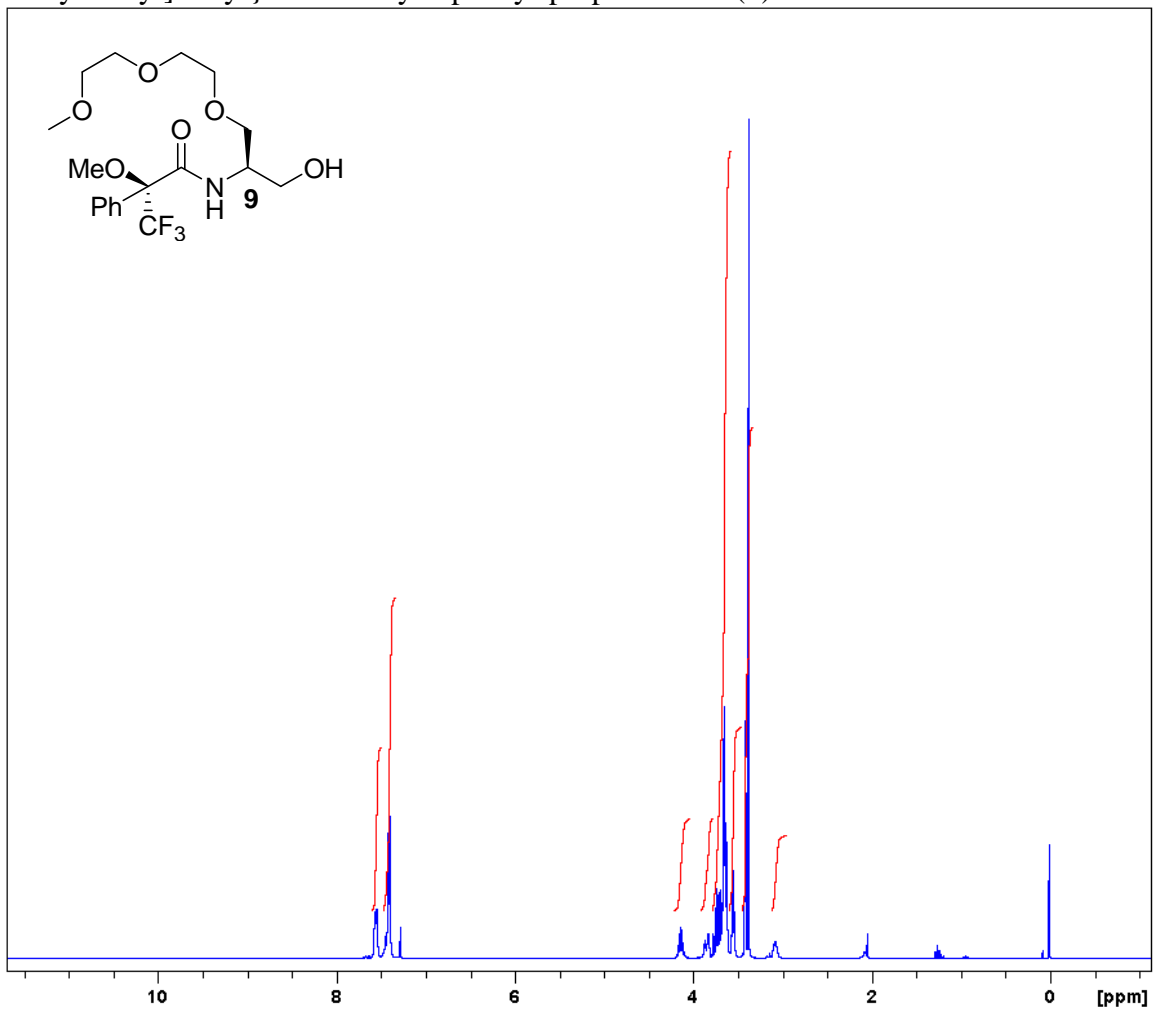

**Figure S29.**  $^{13}\text{C}$ -NMR of 3,3,3-trifluoro-N-{2-hydroxy-1-[2-(2-methoxy-ethoxy)-ethoymethyl]-ethyl}-2-methoxy-2-phenyl-propionamide (**9**).

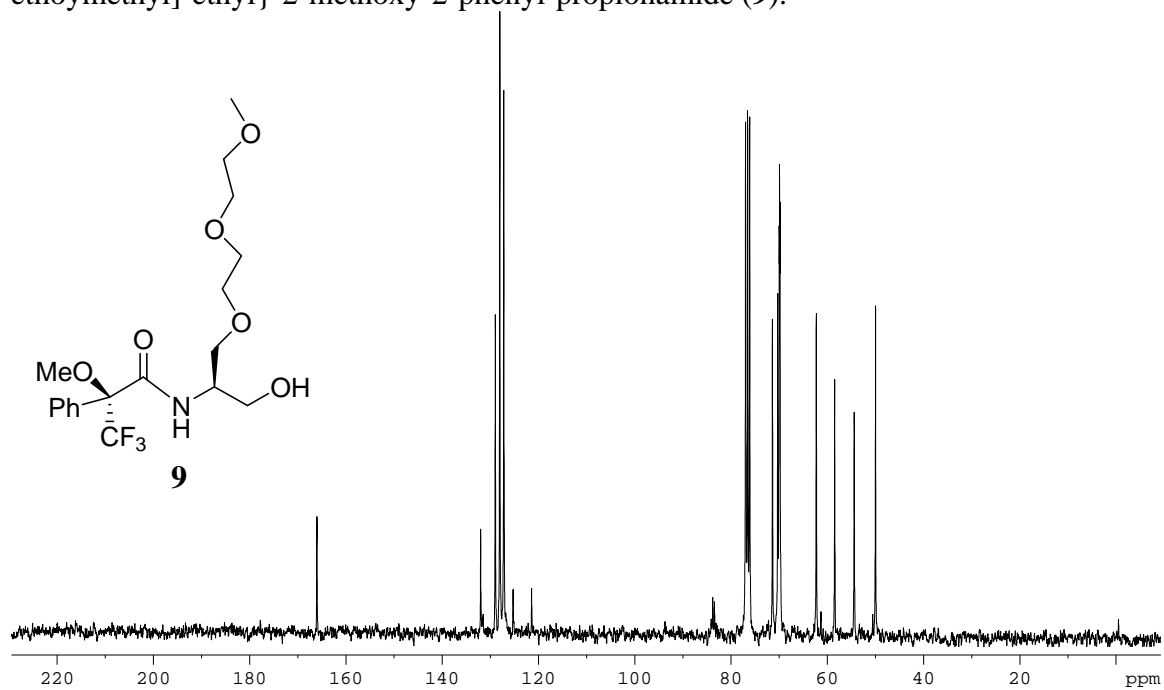





**Figure S31.**  $^{13}\text{C}$ -NMR of {[3-[2-(2-Methoxy-ethoxy)-ethoxy]-2-(3,3,3-trifluoro-2-methoxy-2-phenyl-propionylamino)-propyl]-[2-thymine-acetyl]-amino}-acetic acid (**10**)

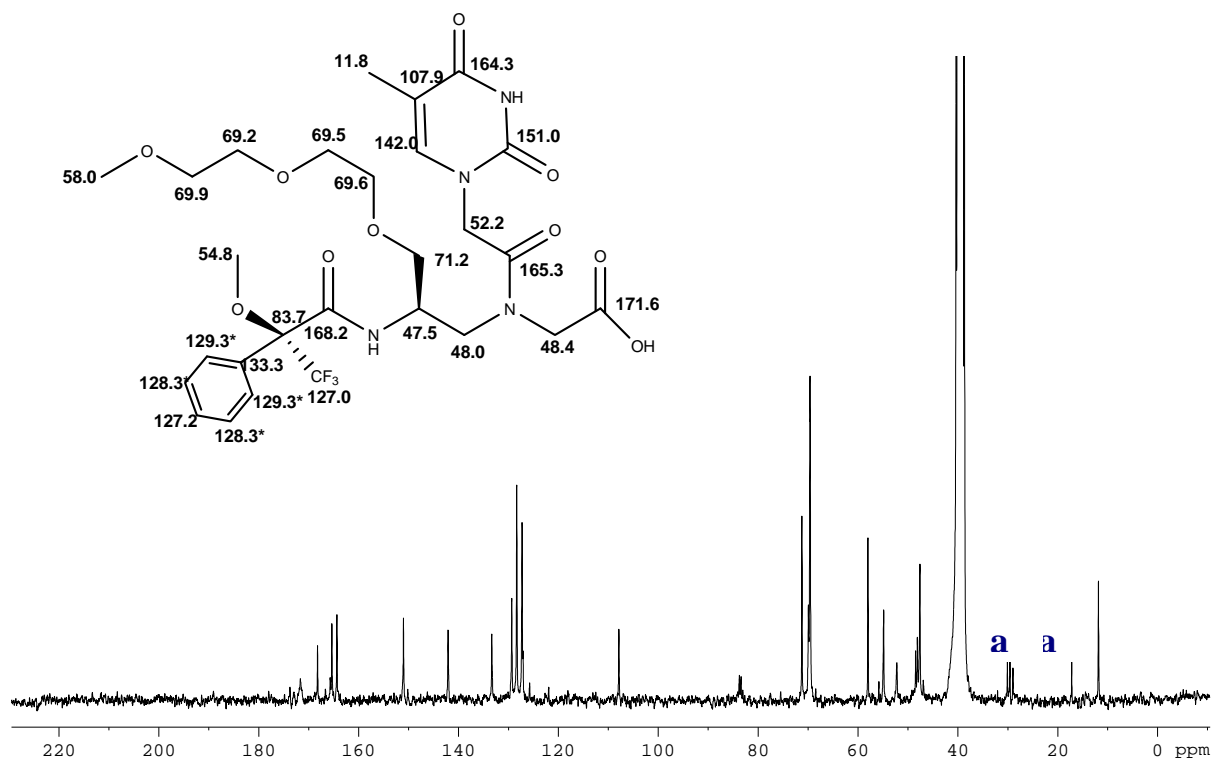

\* Peaks are merged together  
a Impurity peaks

**Figure S32.** Reinjected HPLC trace of PNA1.

PNA1: H-GCATGTTTGA-NH<sub>2</sub> (Unmodified PNA)

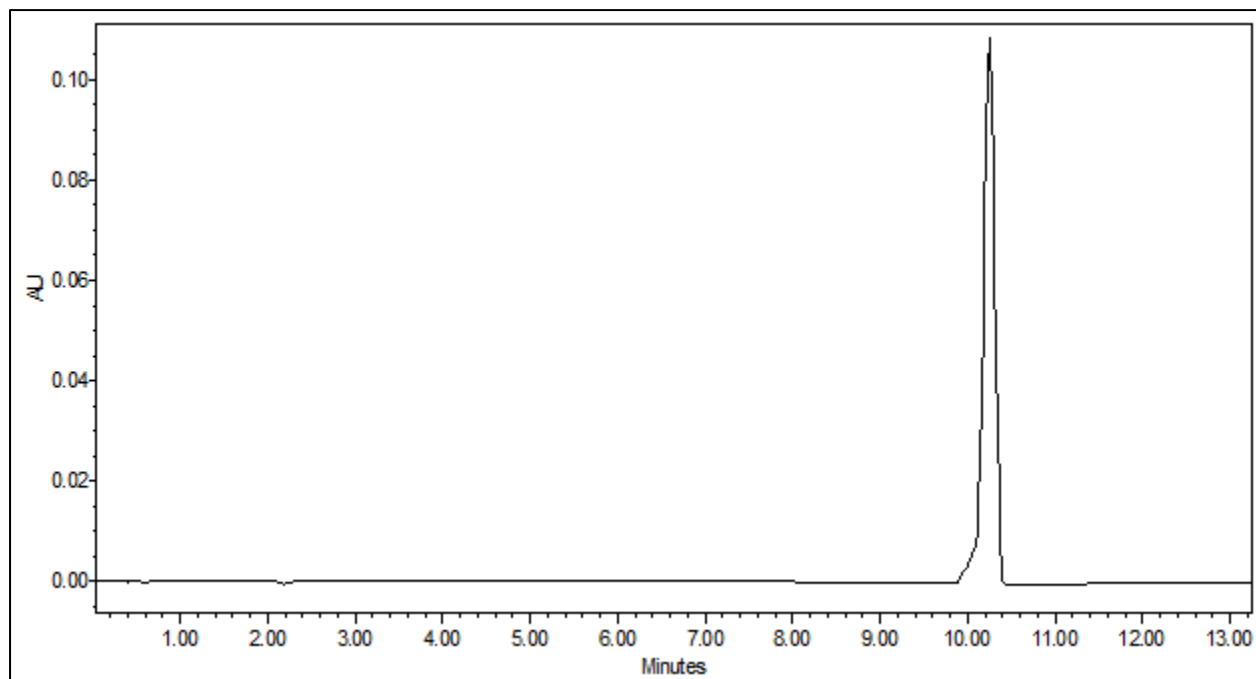

Eluent A: 0.1% TFA in water, and eluent B: 0.1% TFA in ACN. The gradient was 0-40% of eluent B in 50 minutes at 40°C with a flow rate of 3.0 mL/min.

Figure S33. MALDI-TOF MS of PNA1

Calculated Mass = 2764.9

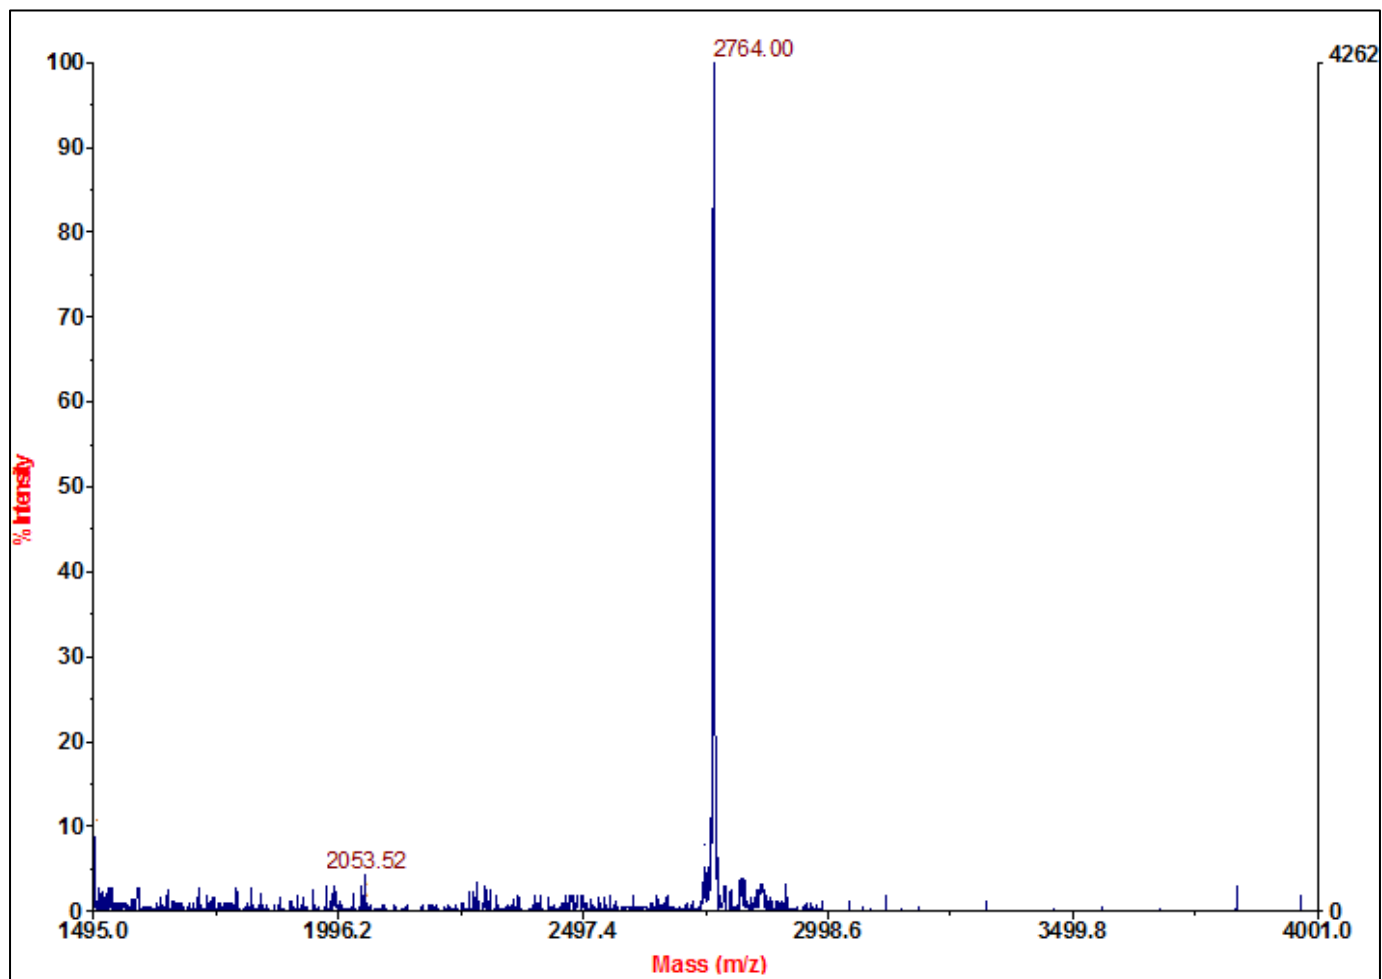

**Figure S34.** Reinjected HPLC trace of PNA2

PNA2: H-GCATGTTTGA-NH2

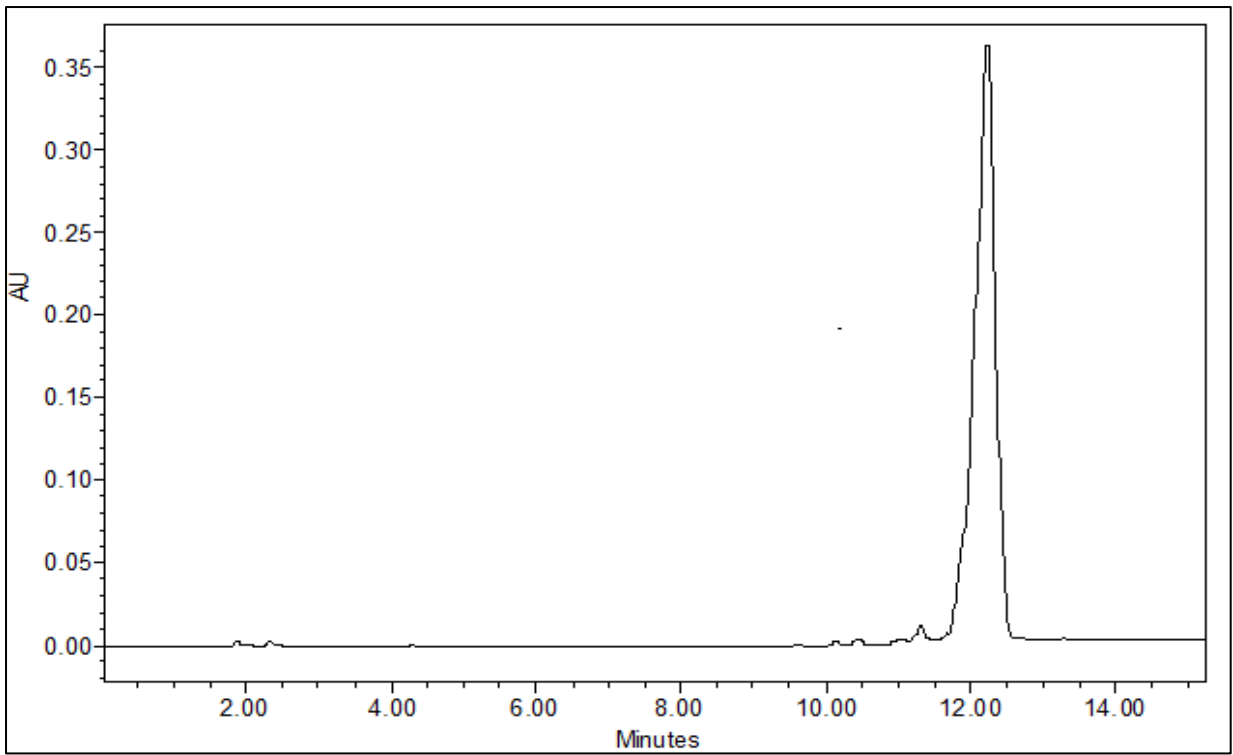

Figure S35. MALDI-TOF MS of PNA2

Calculated Mass = 2883.1

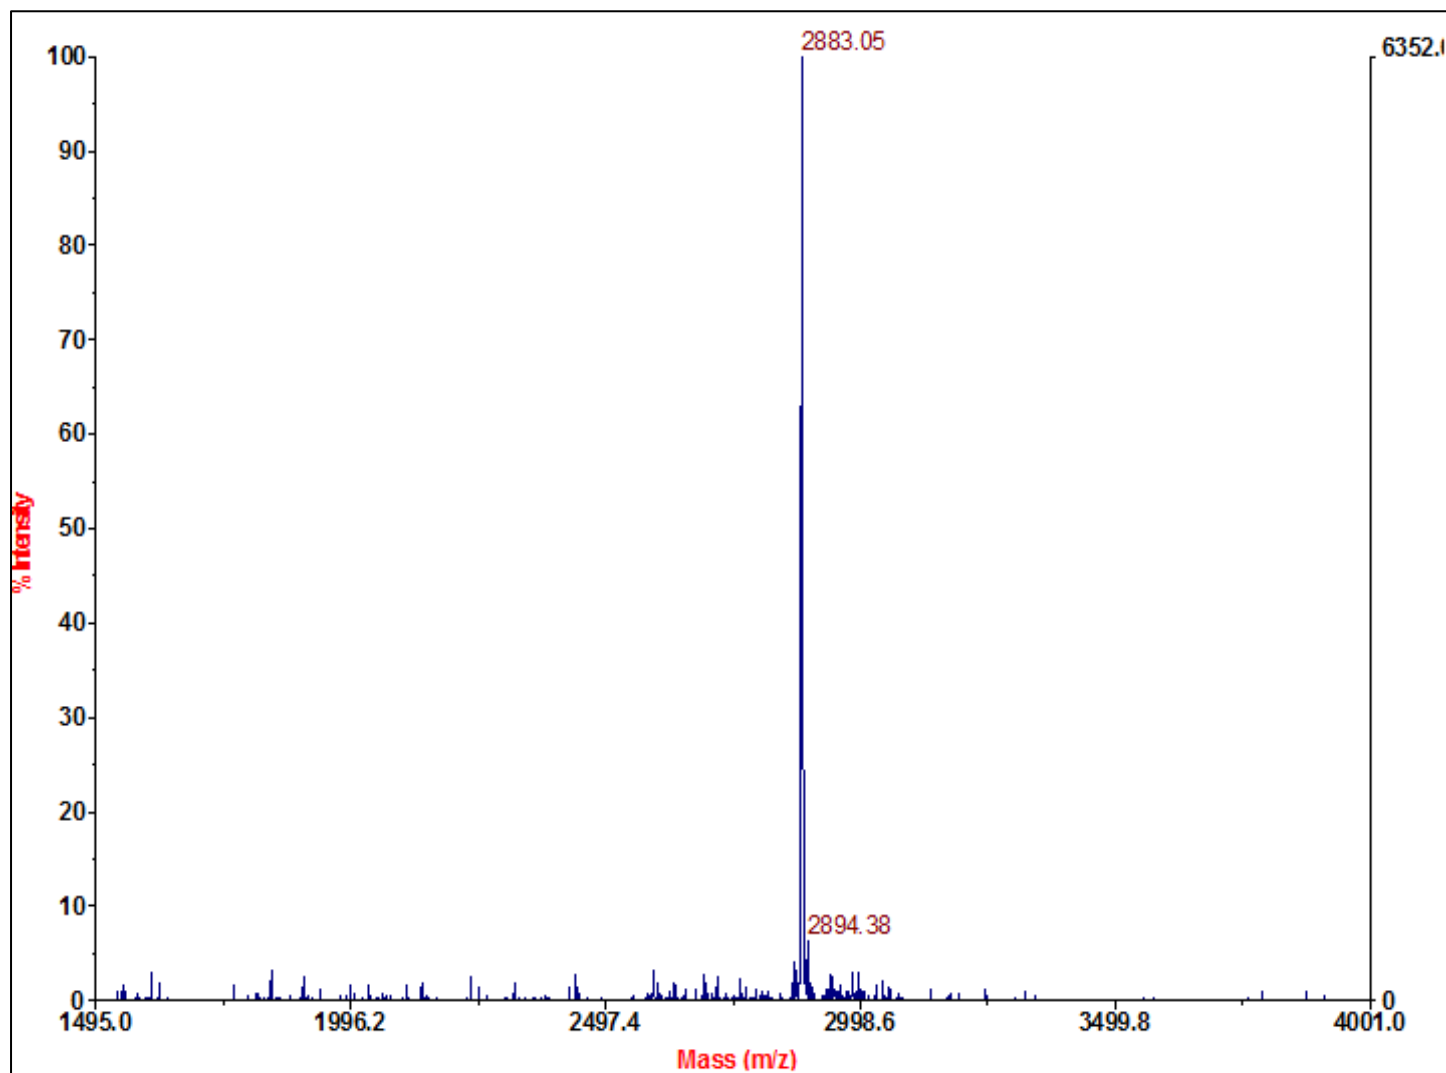

*Figure S36.* Reinjected HPLC trace of PNA3

PNA3: H-GCATGTTTGA-NH<sub>2</sub>

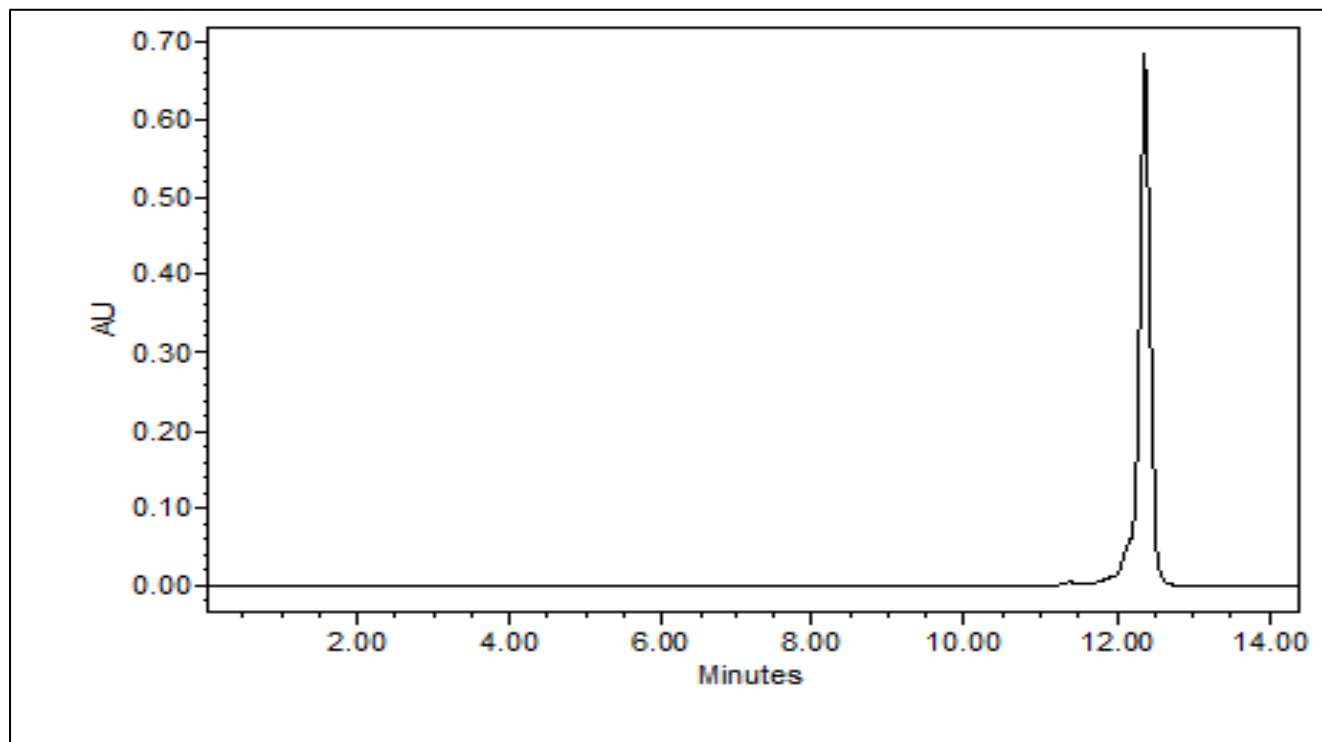

Figure S37. MALDI-TOF MS of PNA3

Calculated Mass = 3119.1

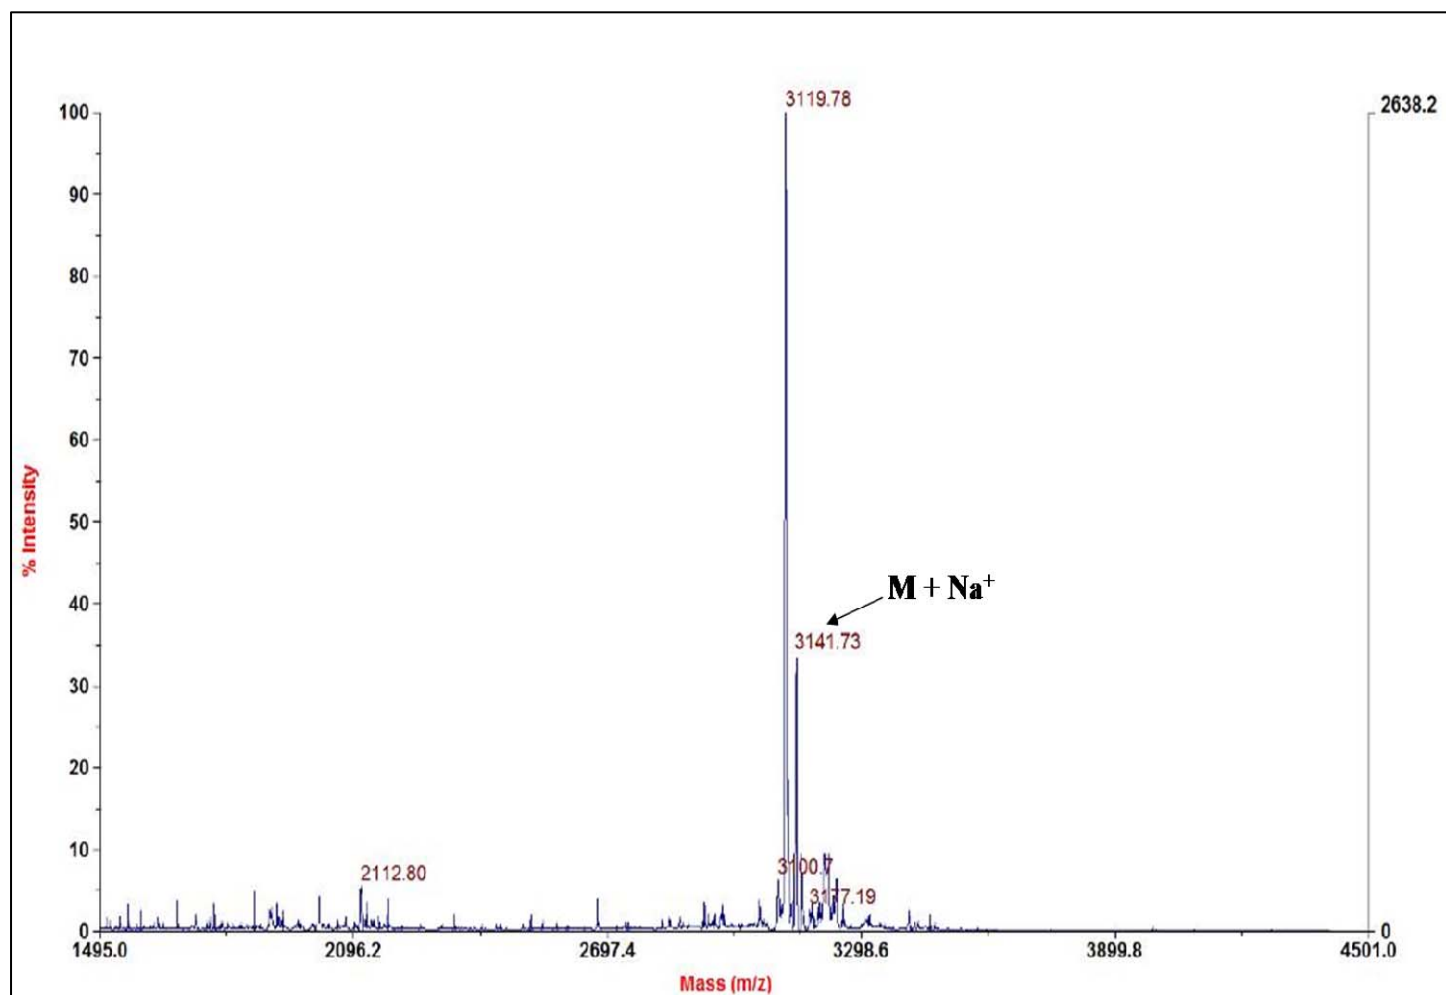

*Figure S38.* Reinjected HPLC trace of PNA4

PNA 4: H-GCATGTTTGA-NH<sub>2</sub>

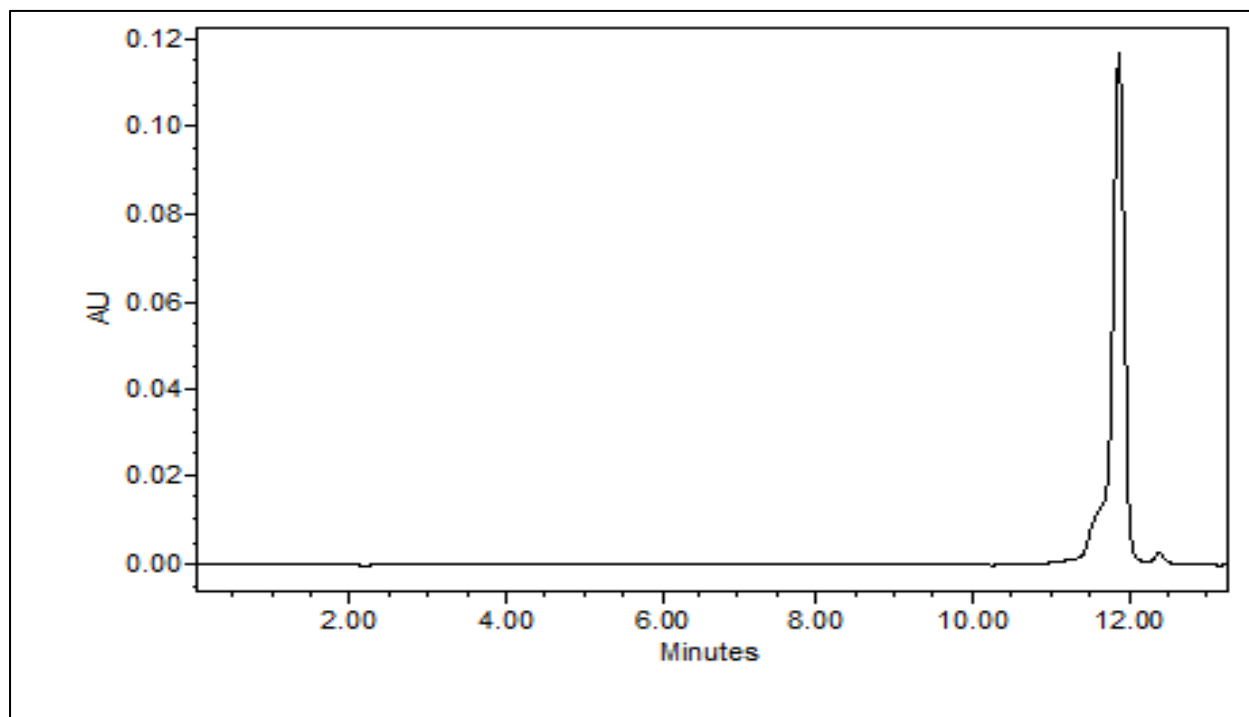



*Figure S39.* MALDI-TOF MS of PNA4

**Calculated Mass = 3201.1**

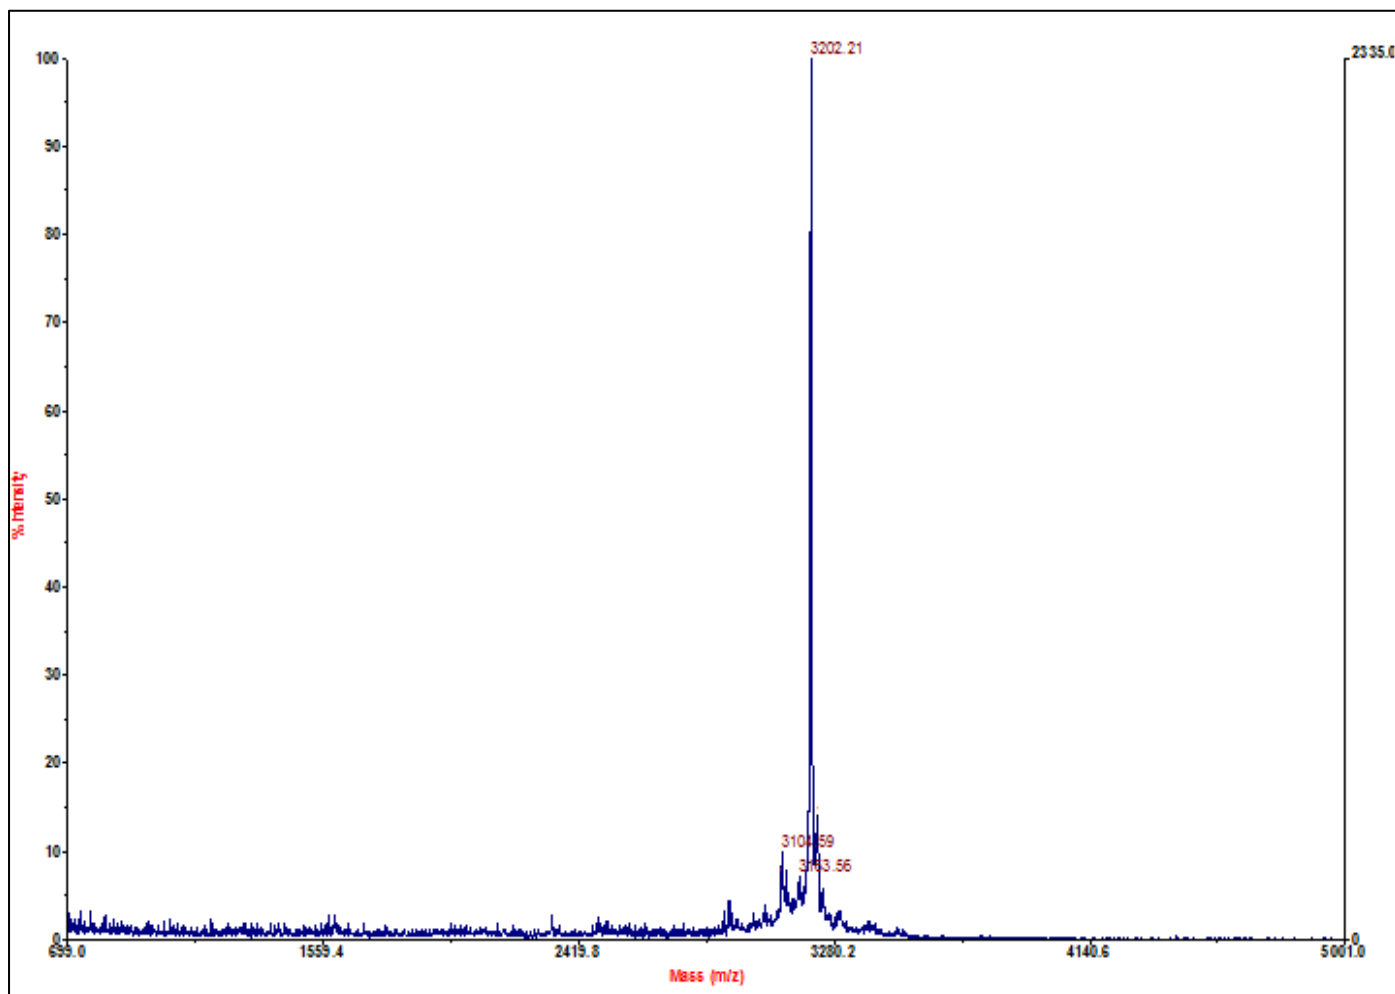

**Figure S40.** Reinjected HPLC trace of PNA5

PNA 5: H-GCATGTTTGA-NH<sub>2</sub>

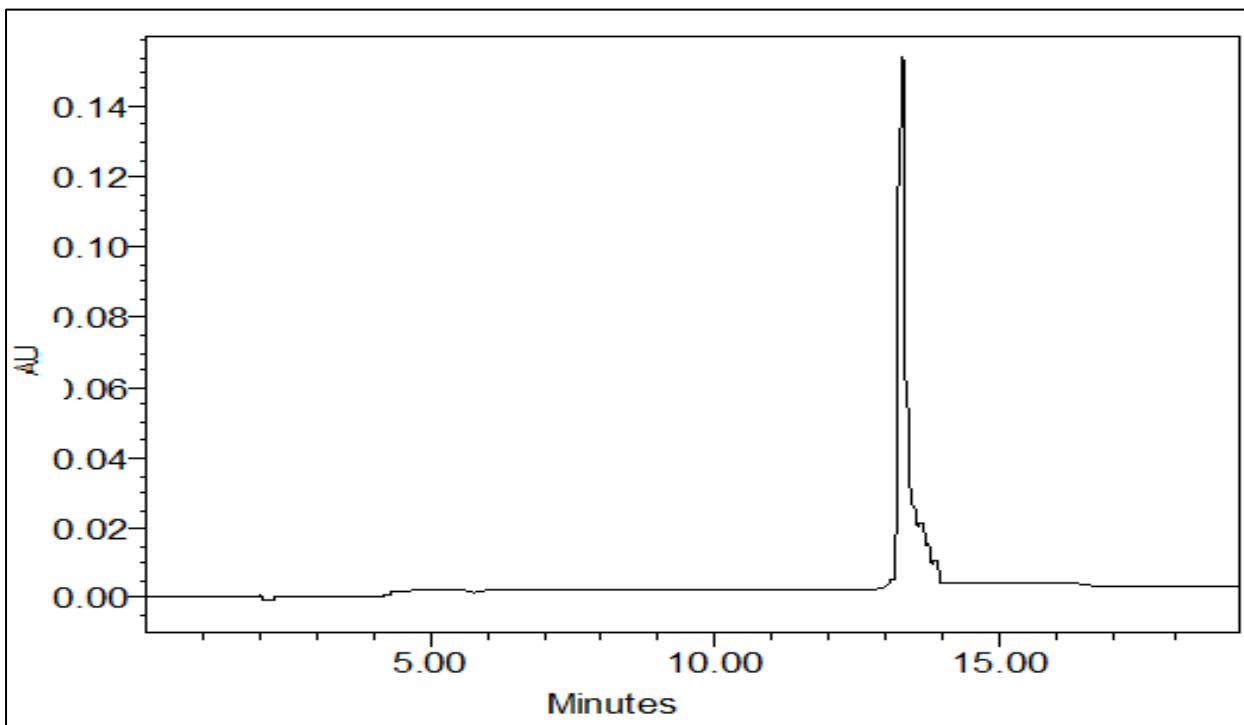

Figure S41. MALDI-TOF MS of PNA5

Calculated Mass = 3945.2

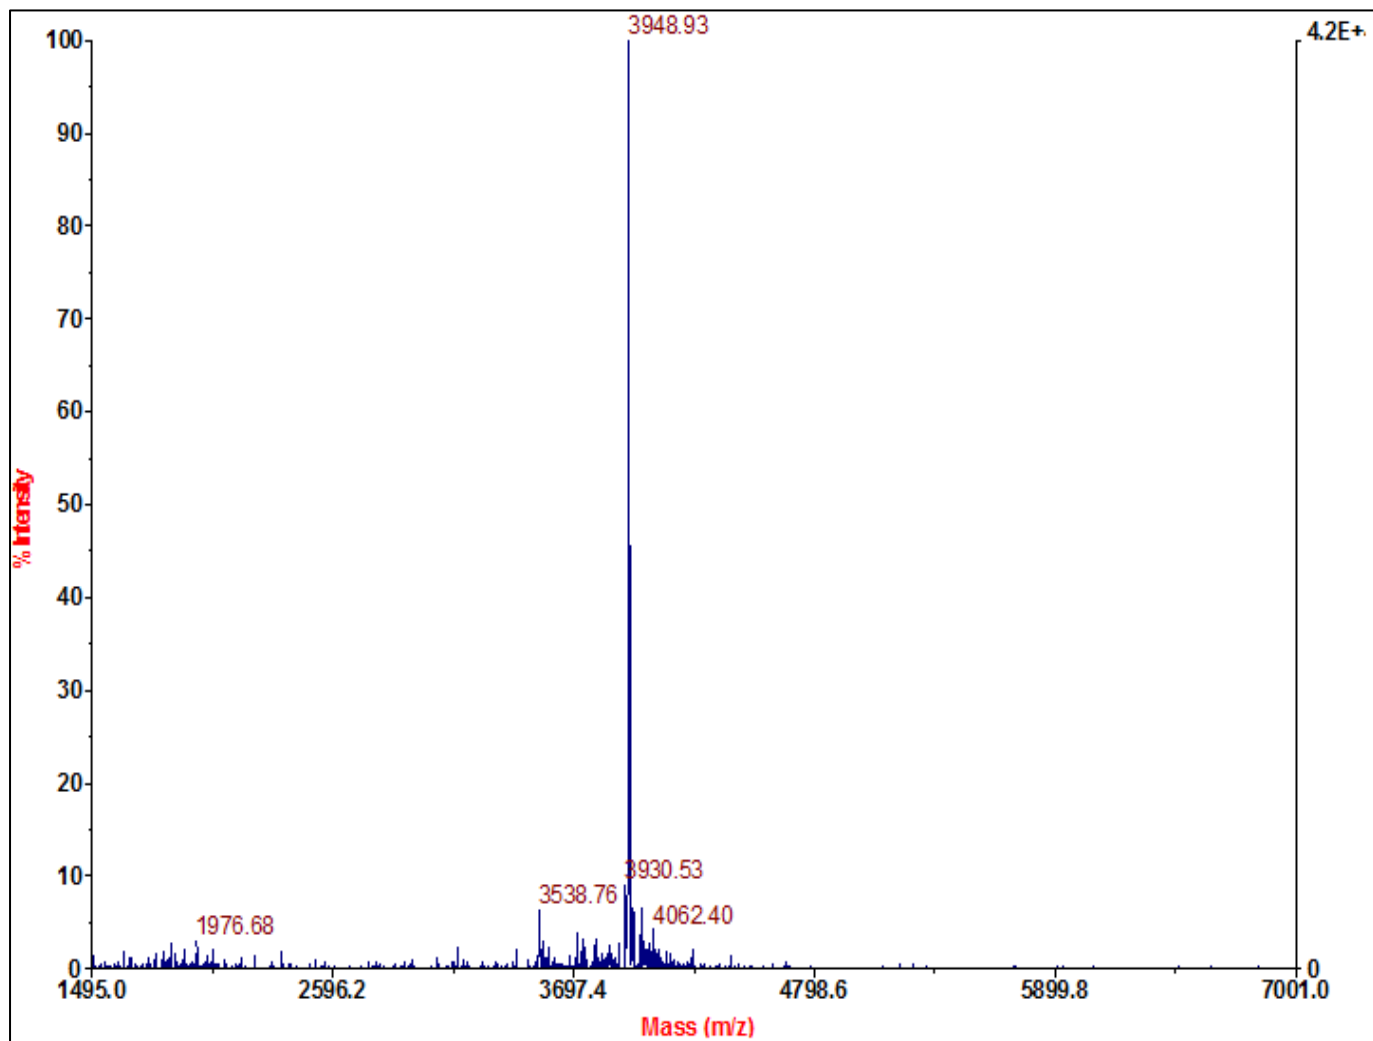

**Figure S42.** Reinjected HPLC trace of PNA6

H-ACGGGTAGAATAACAT-NH<sub>2</sub>

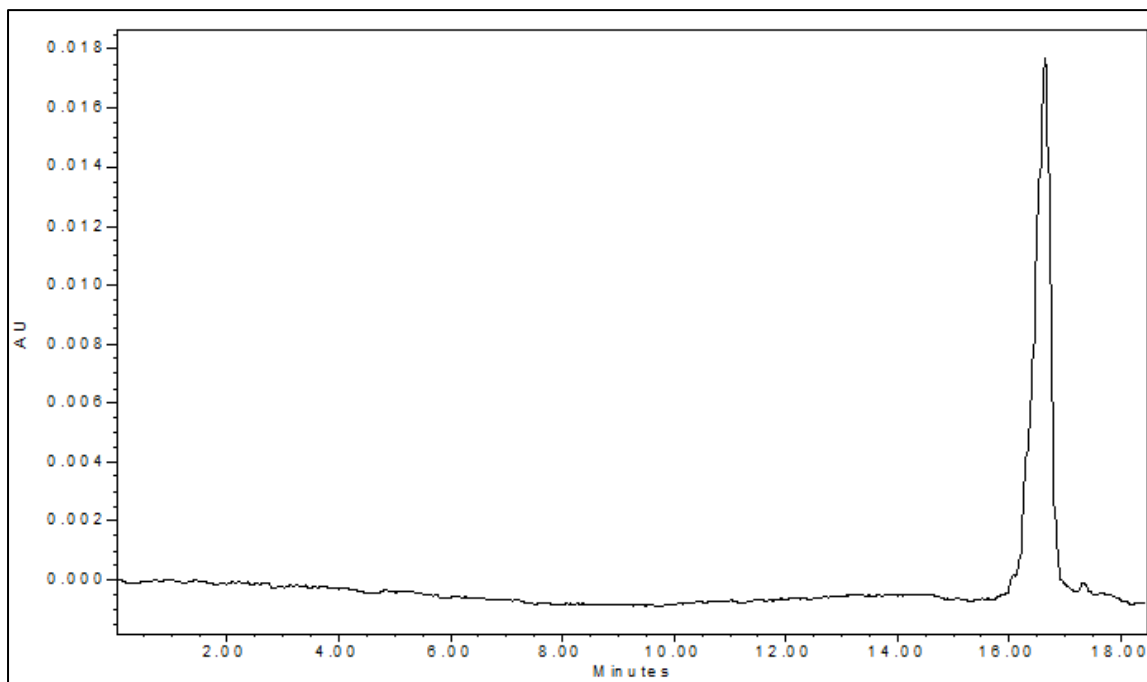

Figure S43. MALDI-TOF MS of PNA6

Calculated Mass: 4421.12

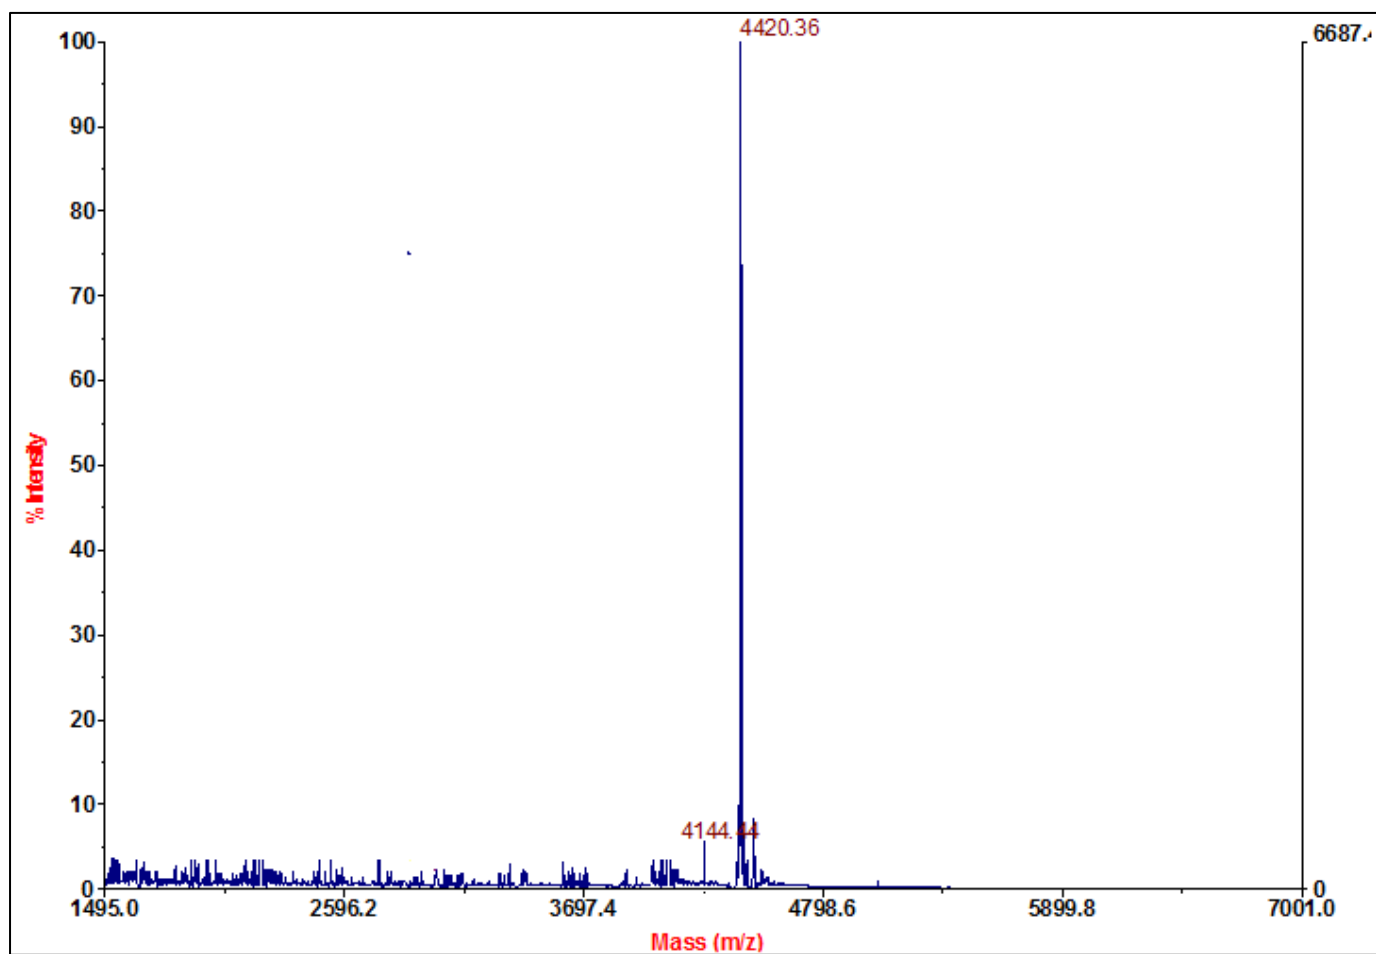

**Figure S44.** Reinjected HPLC trace of PNA7

PNA 7. H-ACGGGTAGAATAACAT-NH<sub>2</sub>

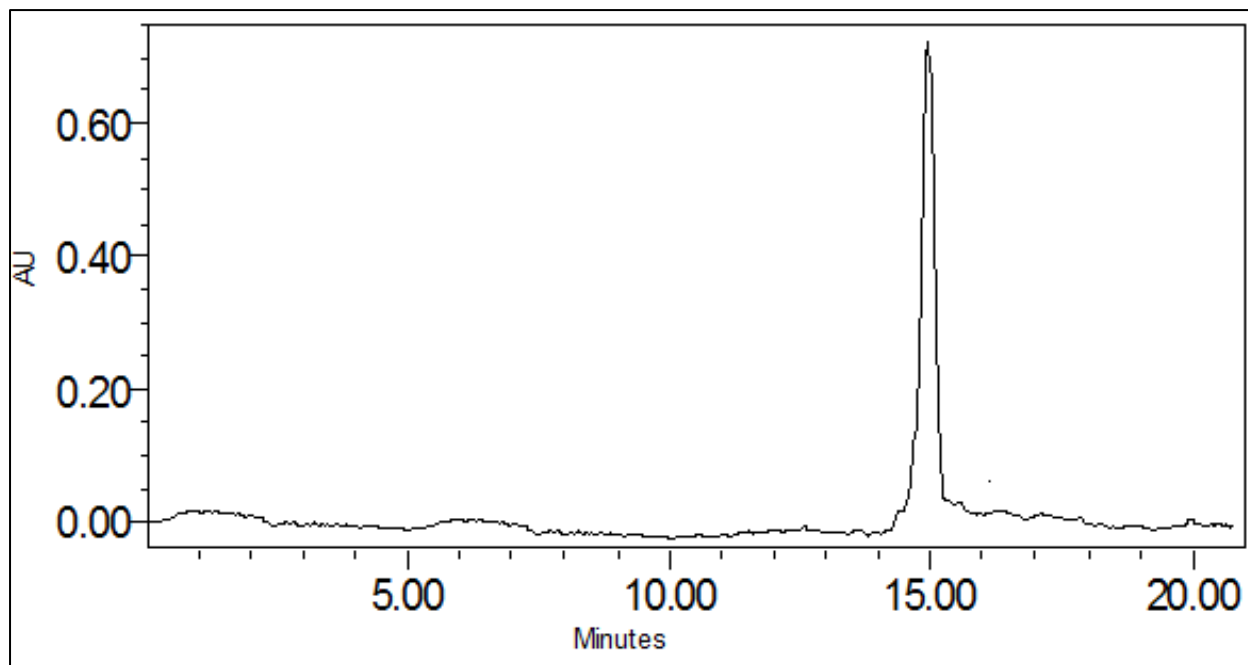

Figure S45. MALDI-TOF MS of PNA7

Calculated Mass = 4539.1

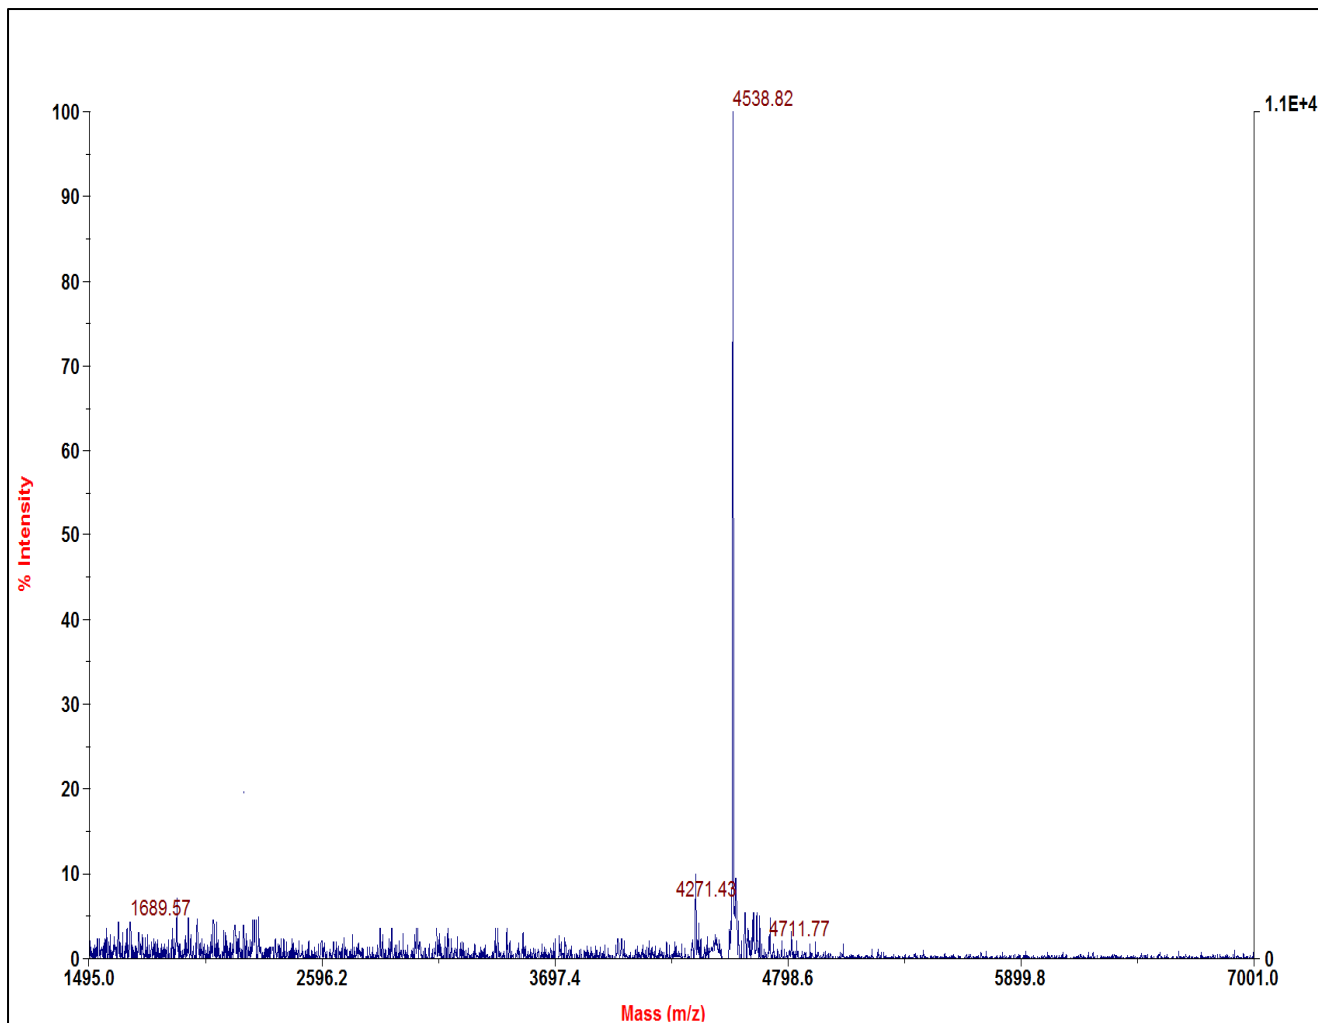

**Figure S46.** Reinjected HPLC trace of PNA8

PNA 8. H-ACGGGTAGAATAACAT-NH<sub>2</sub>

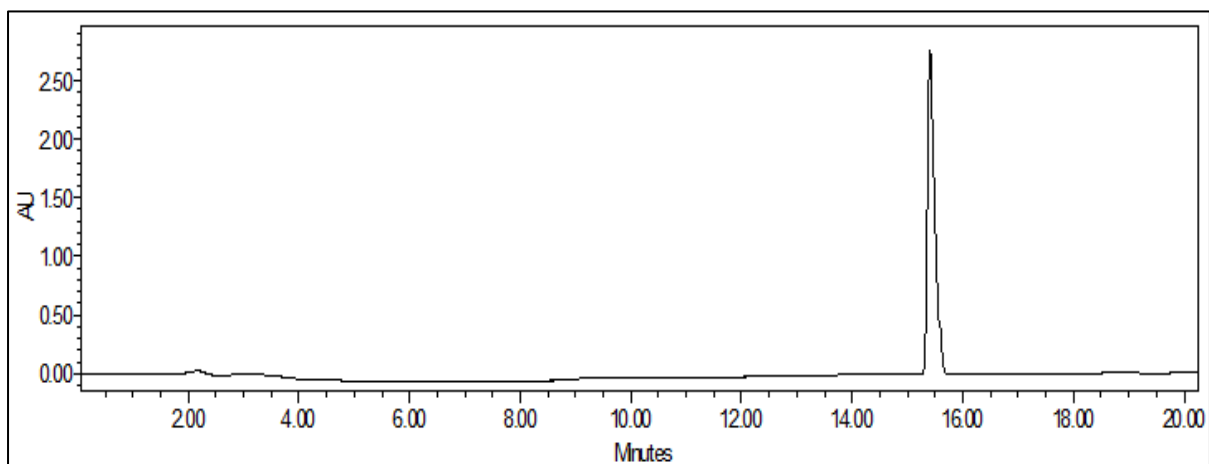



Figure S47. MALDI-TOF MS of PNA8

Calculated Mass = 4783.1

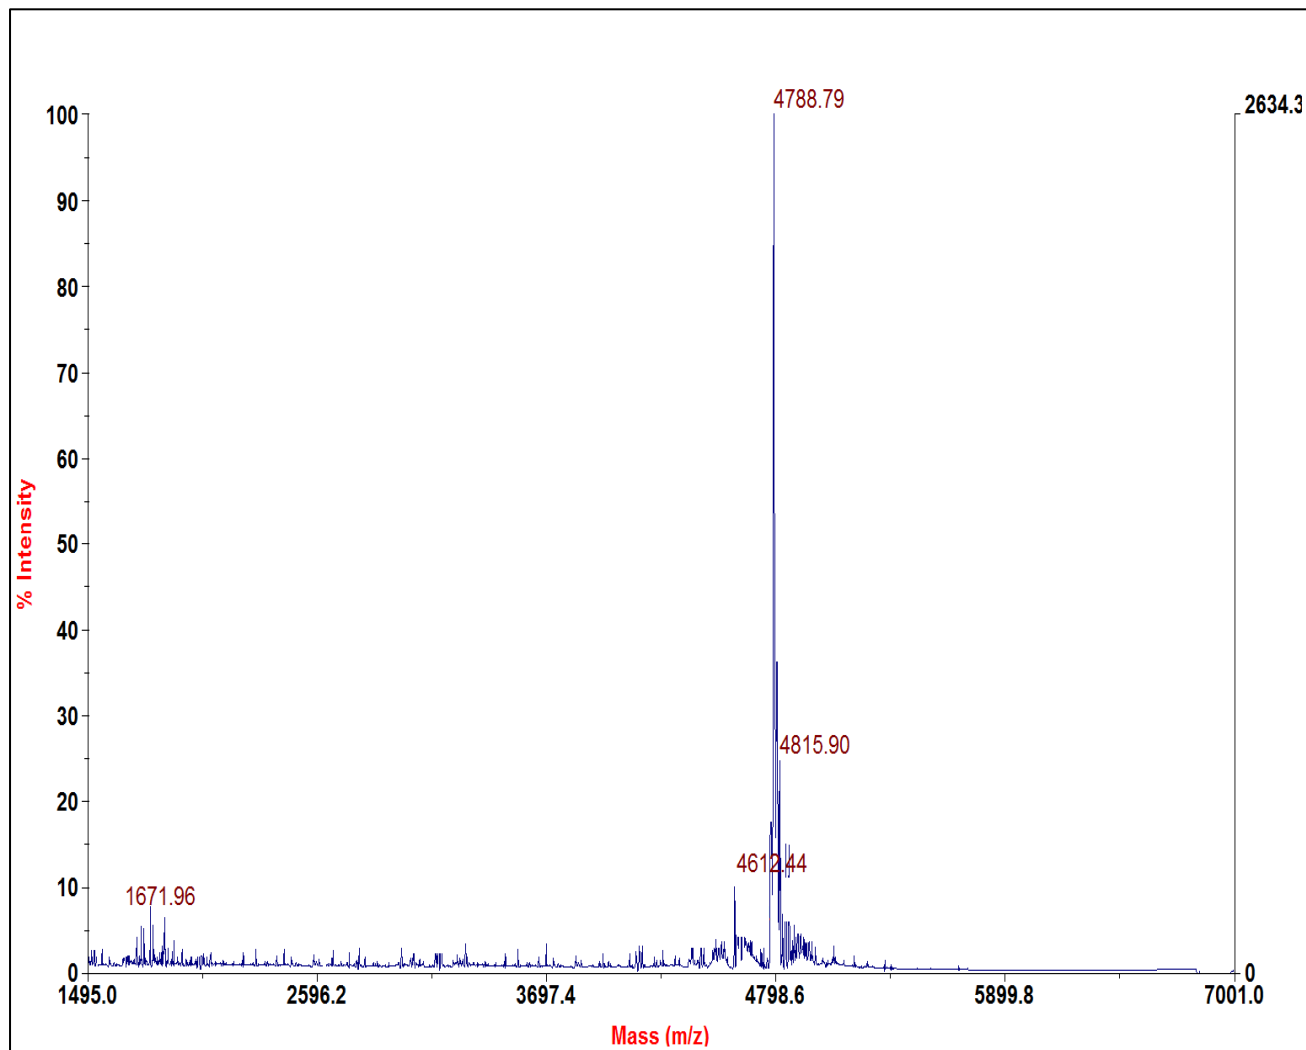

**Figure S48.** Reinjected HPLC trace of PNA9

H-ACGGGTAGAATAACAT-NH<sub>2</sub>

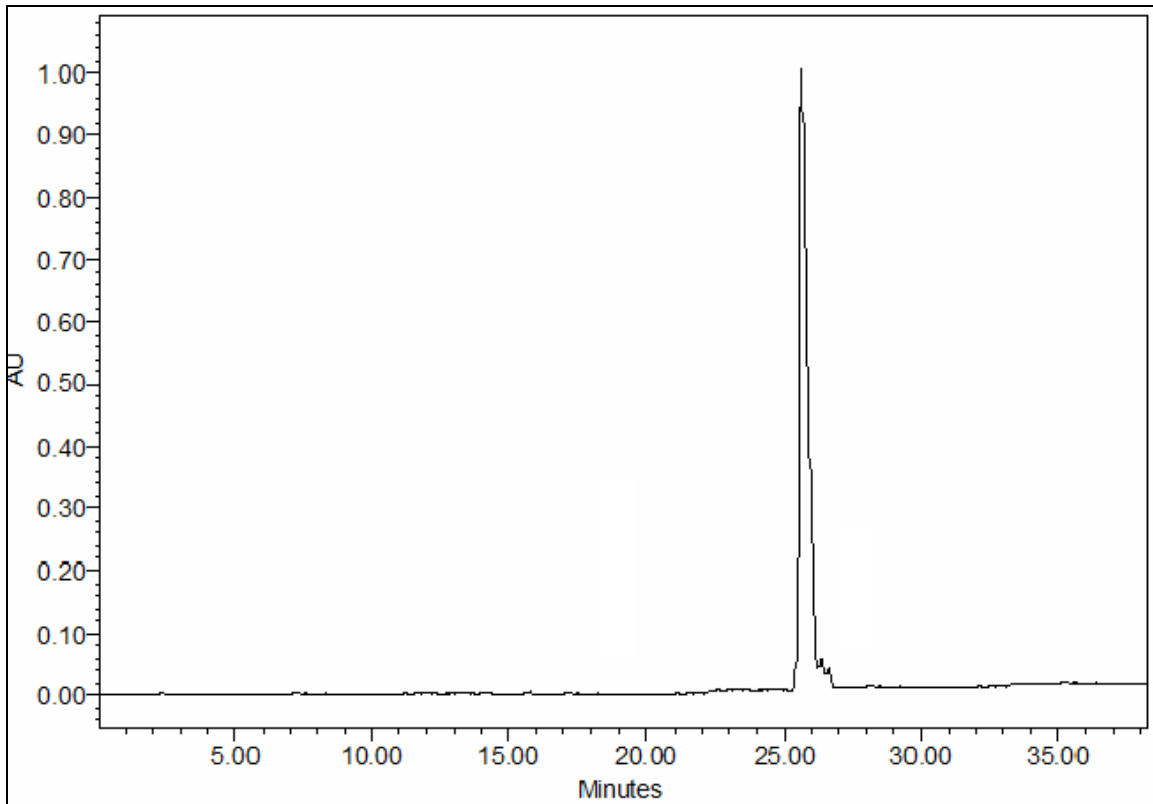

*Figure S49.* MALDI-TOF MS of PNA9

**Calculated Mass = 5055.1**

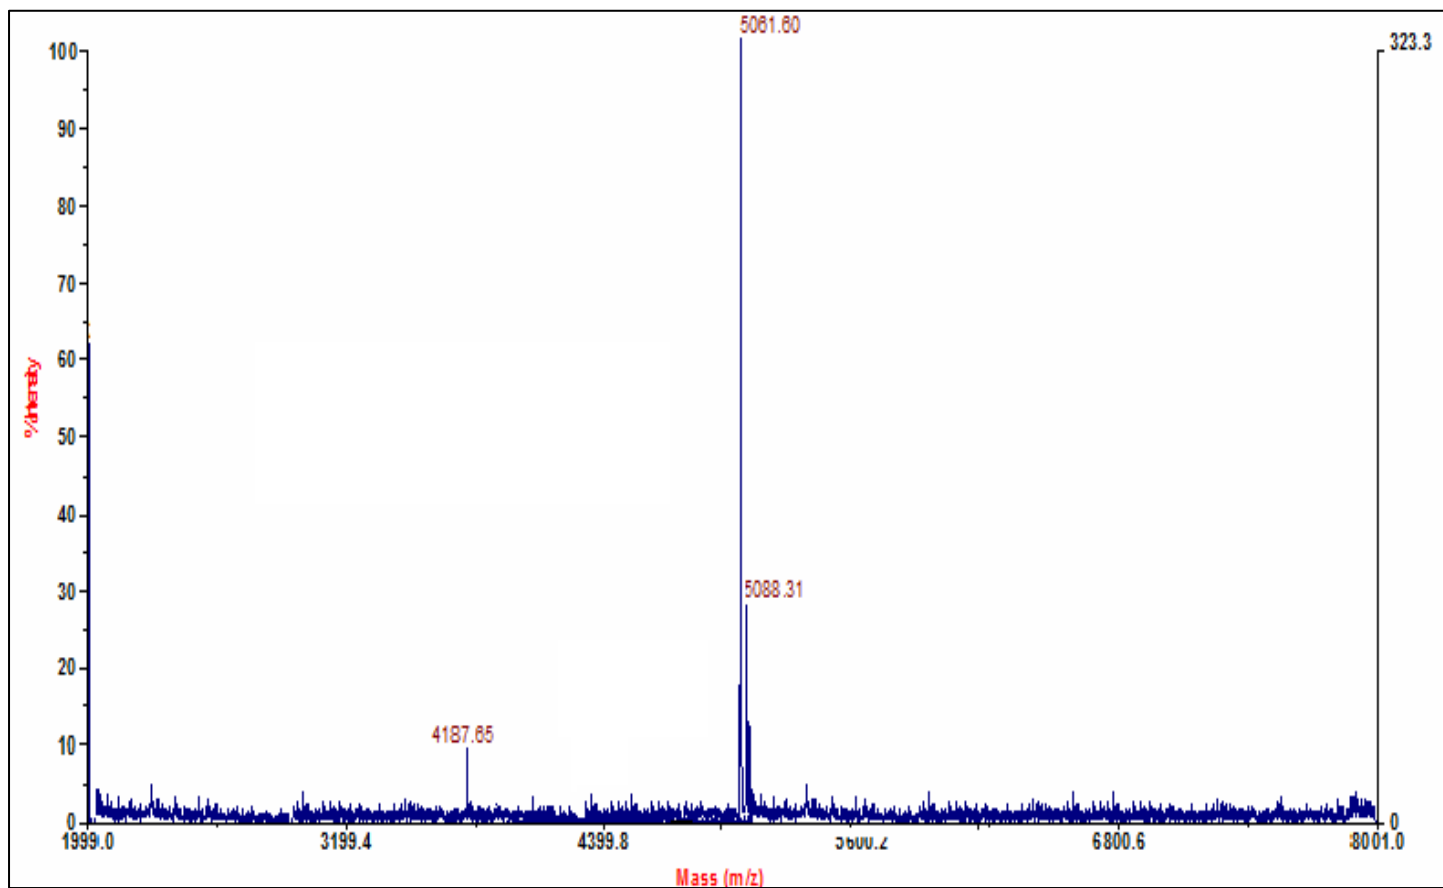

*Figure S50.* Reinjected HPLC trace of PNA10

H-ACGGGTAGAATAACAT-NH<sub>2</sub>

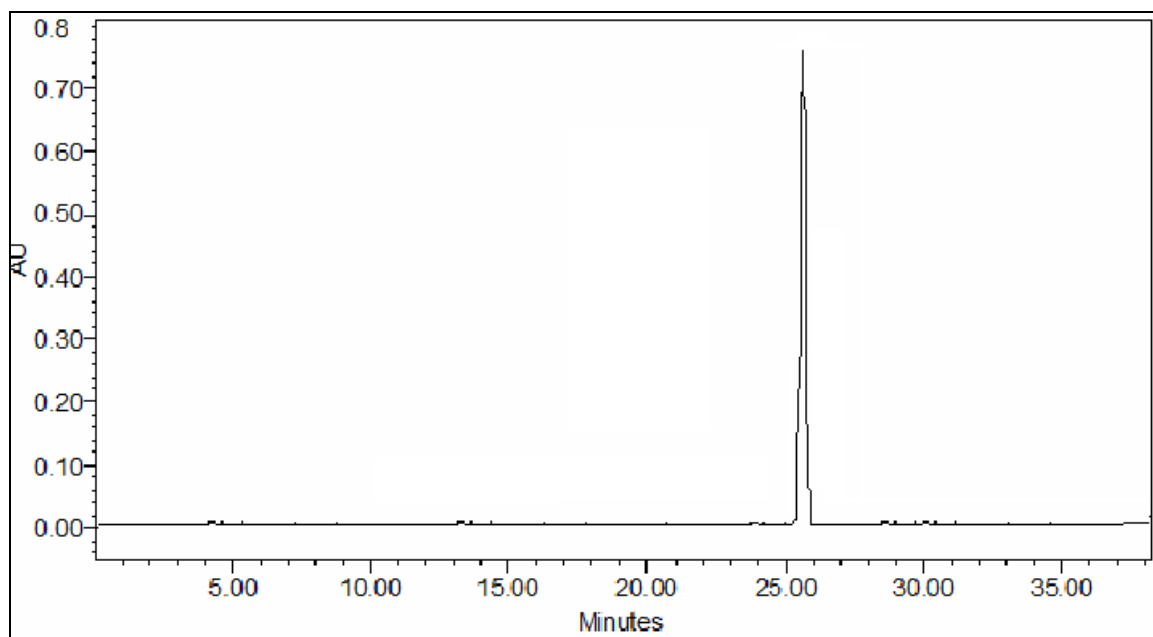

*Figure S51.* MALDI-TOF MS of PNA10

**Calculated Mass = 5428.1**

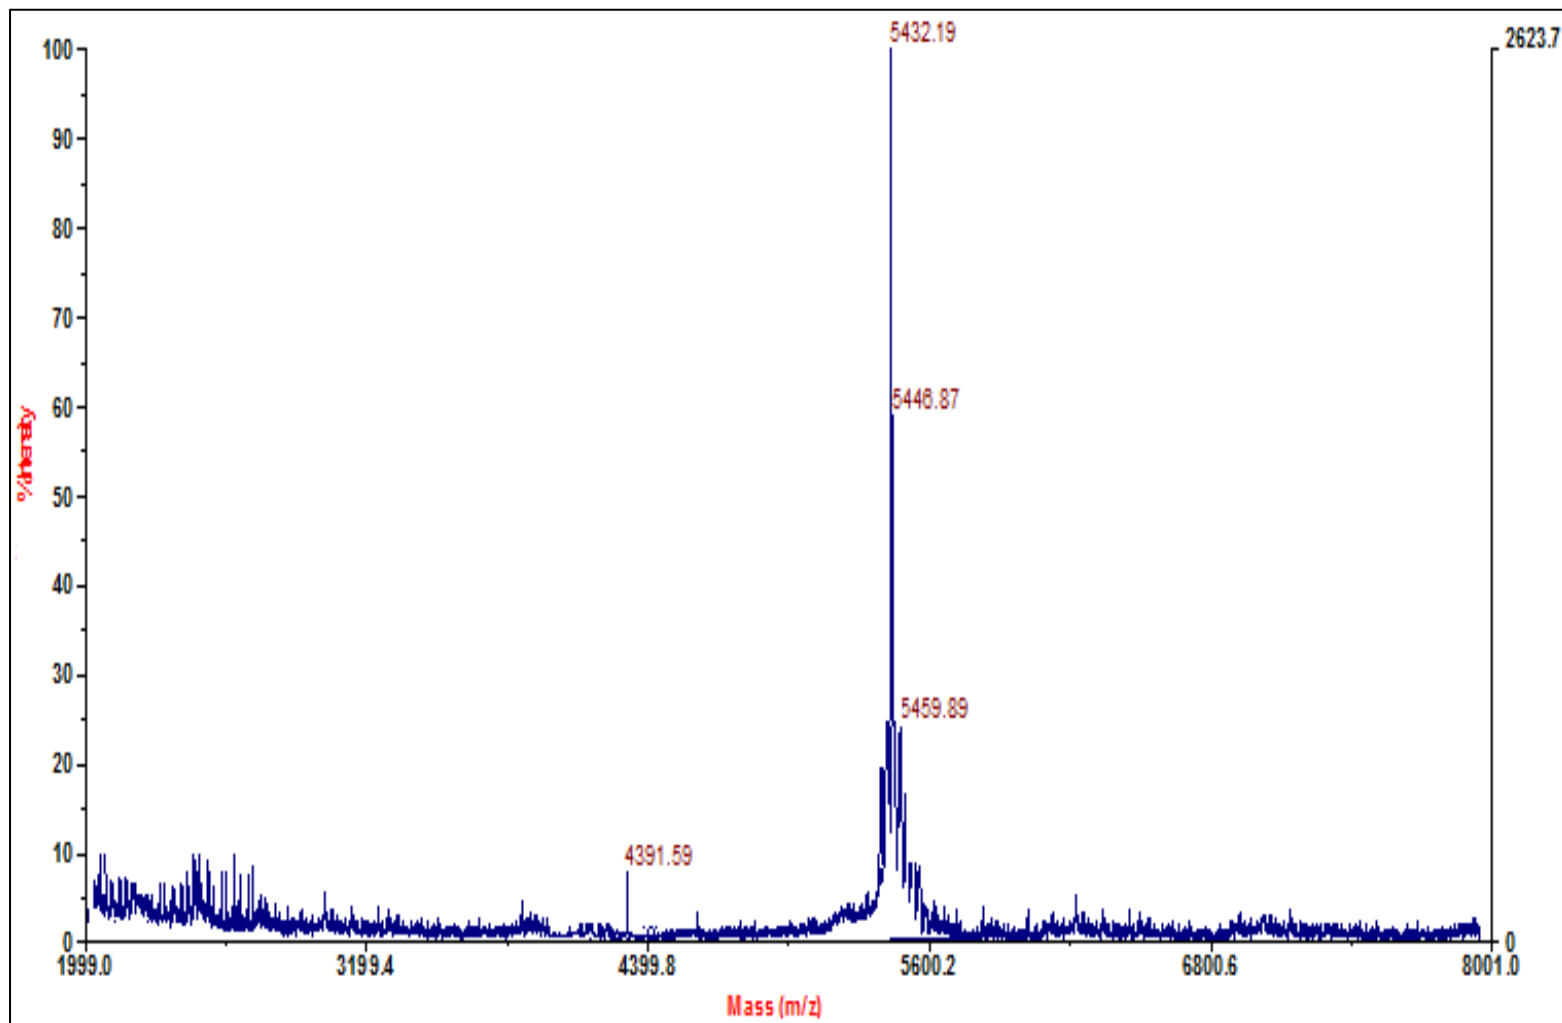

**Figure S52.** Reinjected HPLC trace of PNA1X

PNA 1X: H-<sup>L</sup>Orn(X)-<sup>L</sup>Lys-GCATGTTTGA-NH<sub>2</sub>

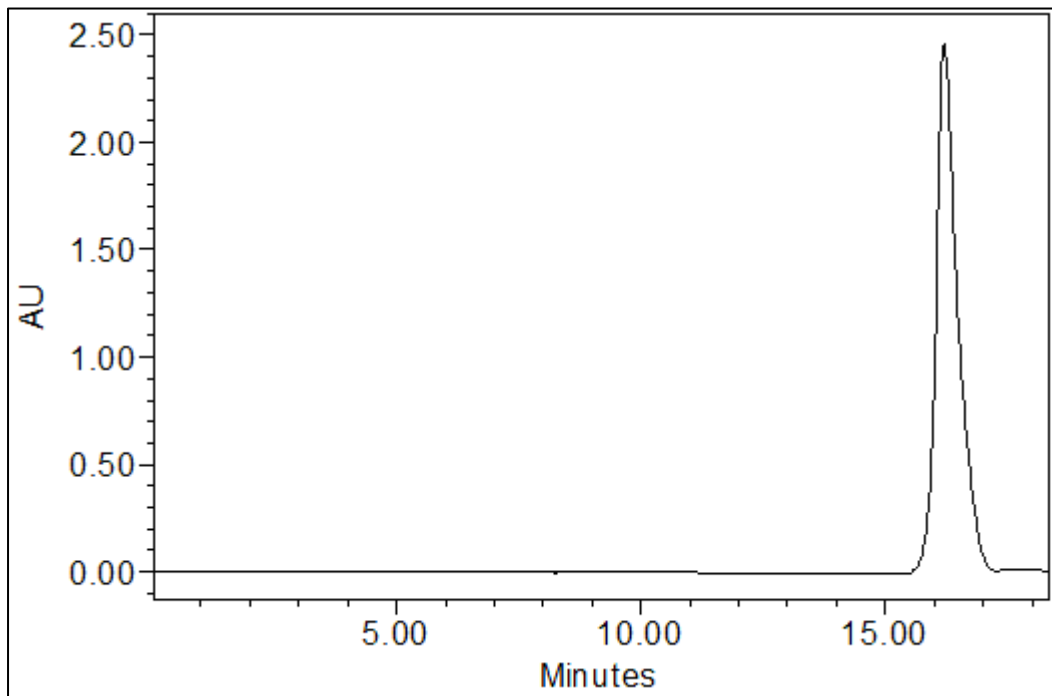

**Figure S53.** MALDI-TOF MS of PNA1X

**Calculated Mass = 3360.1**

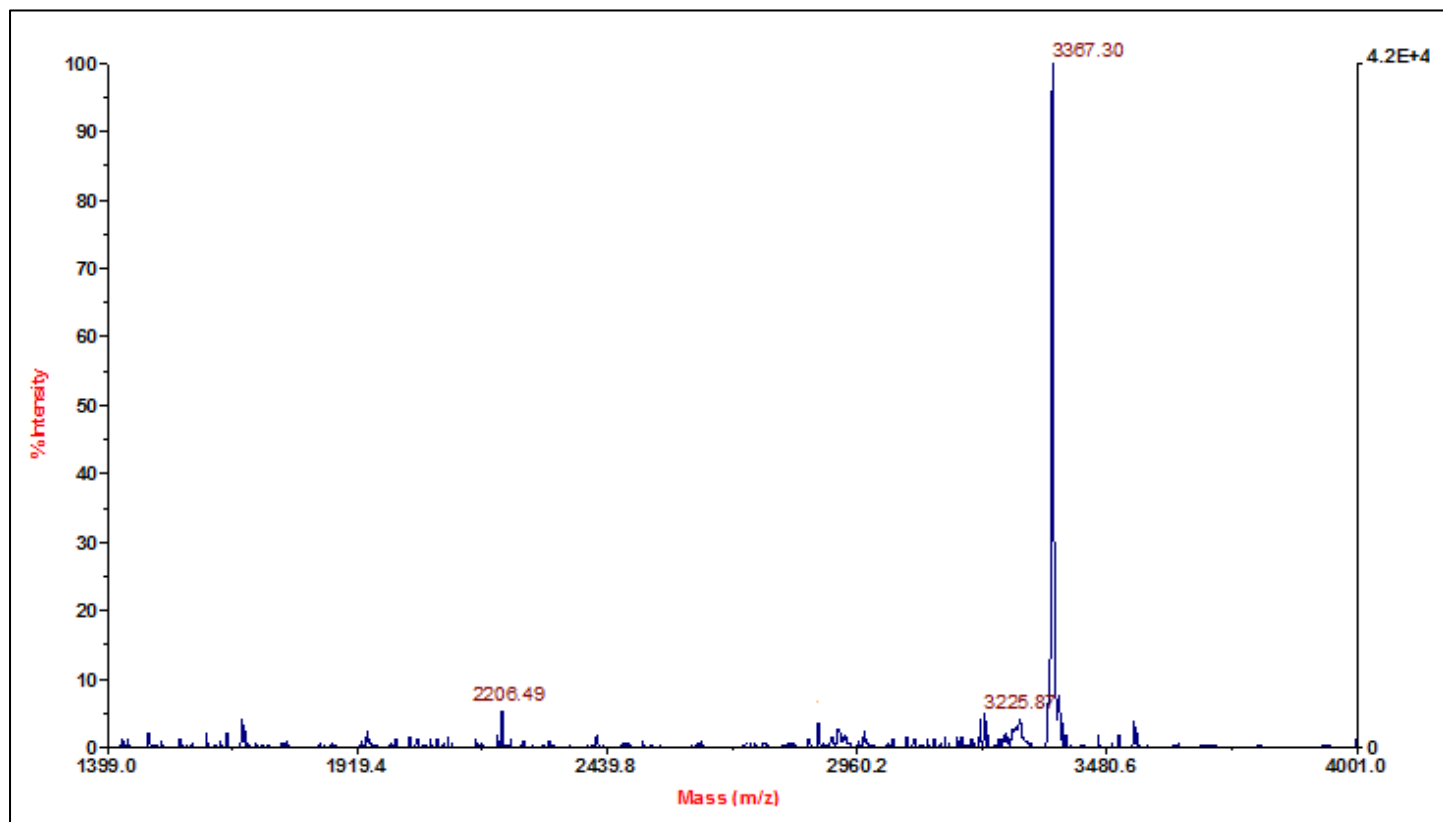

*Figure S54.* Reinjected HPLC trace of PNA1Y

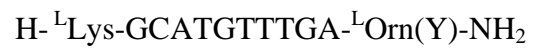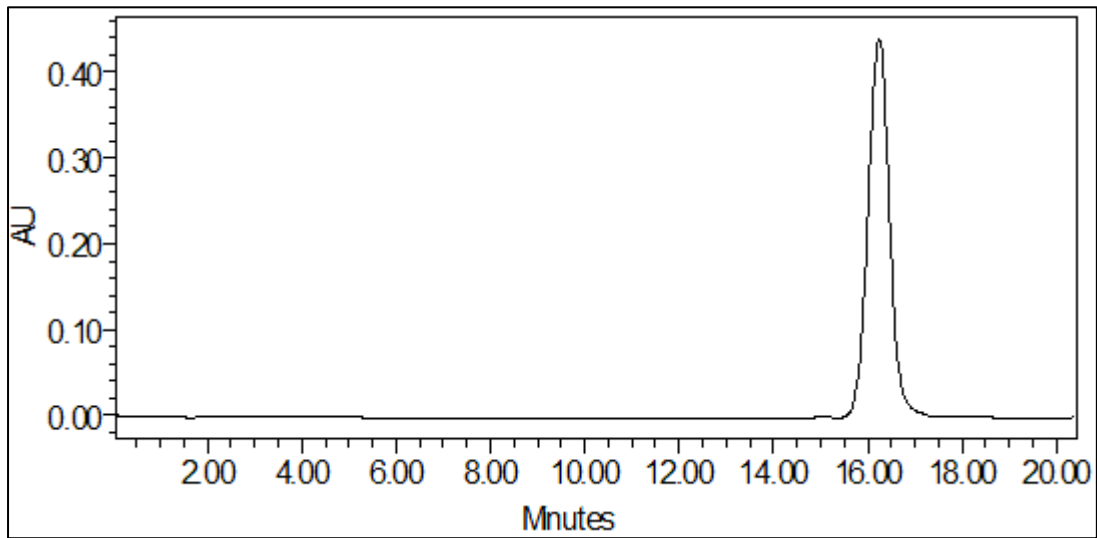



Figure S55. MALDI-TOF MS of PNA1Y

Calculated Mass = 3413.2

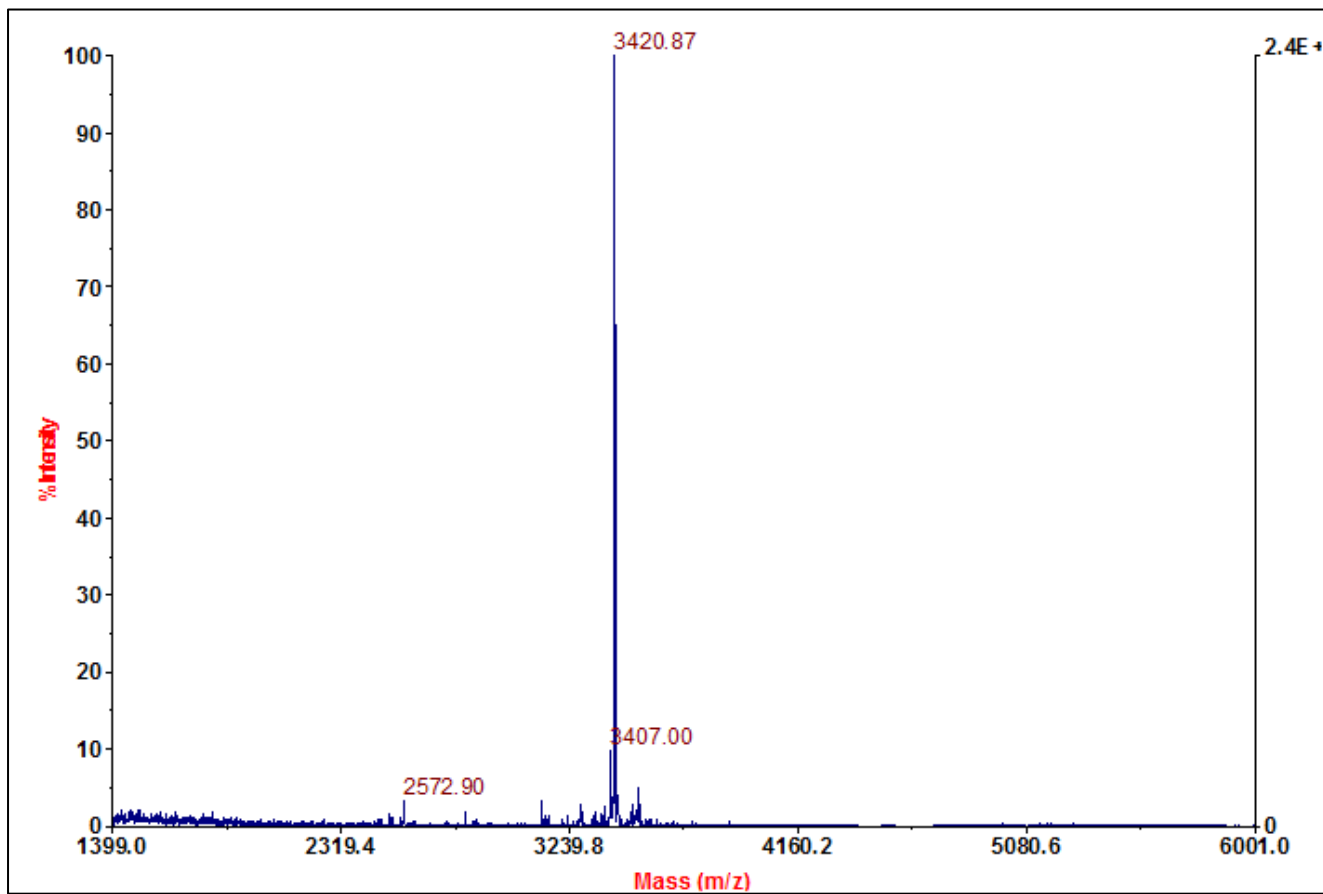

*Figure S56.* Reinjected HPLC trace of PNA4X

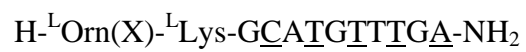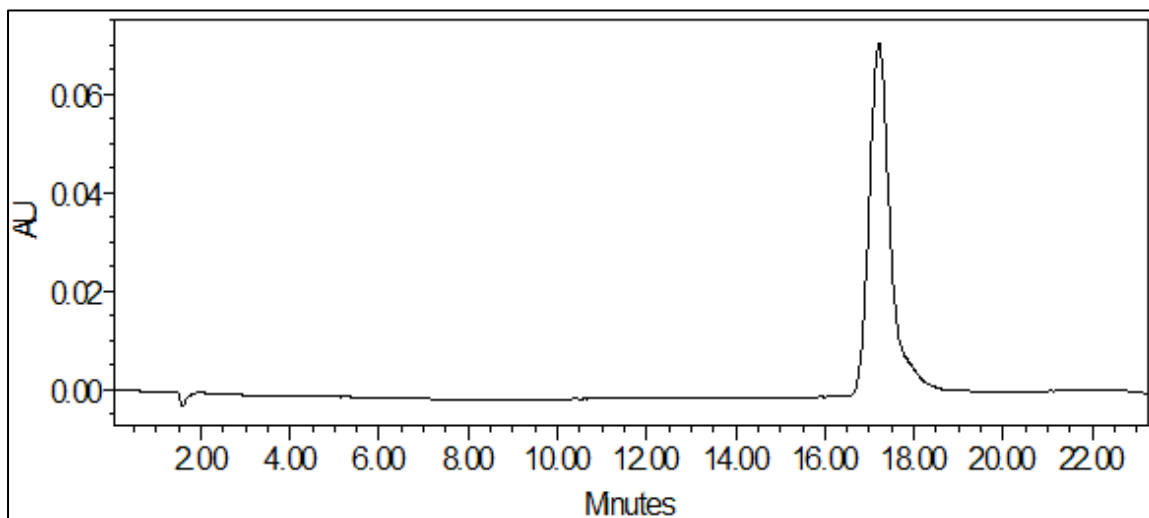

**Figure S57.** MALDI-TOF MS of PNA4X

**Calculated Mass = 3964.1**

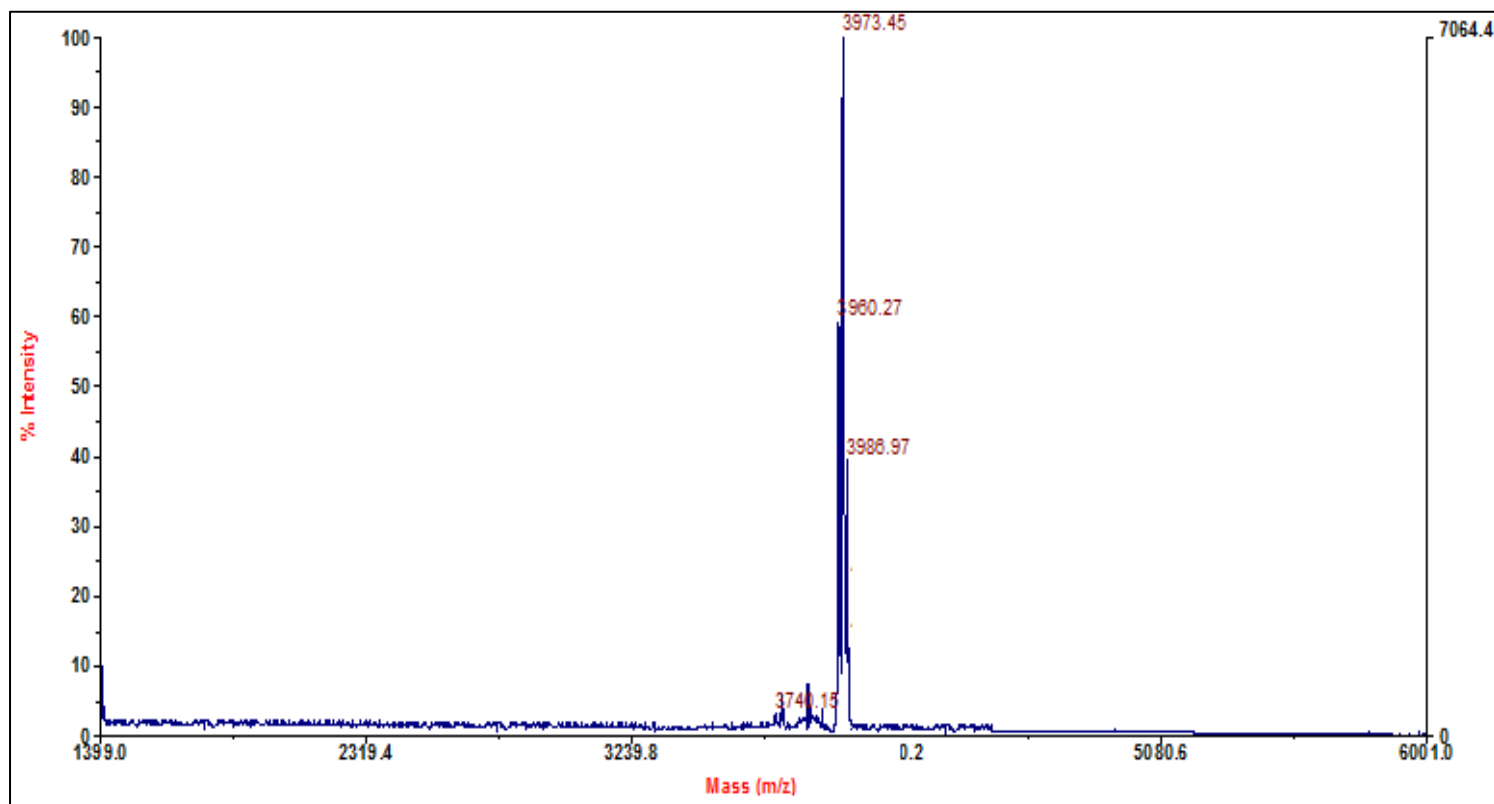

**Figure S58.** Reinjected HPLC trace of PNA4Y

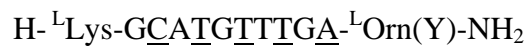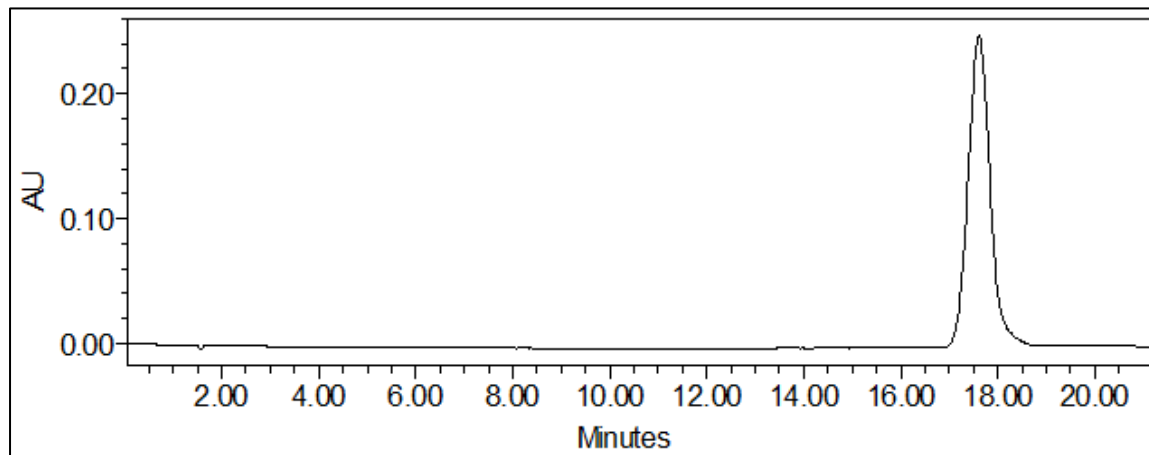

Figure S59. MALDI-TOF MS of PNA4Y

Calculated Mass = 4010.2

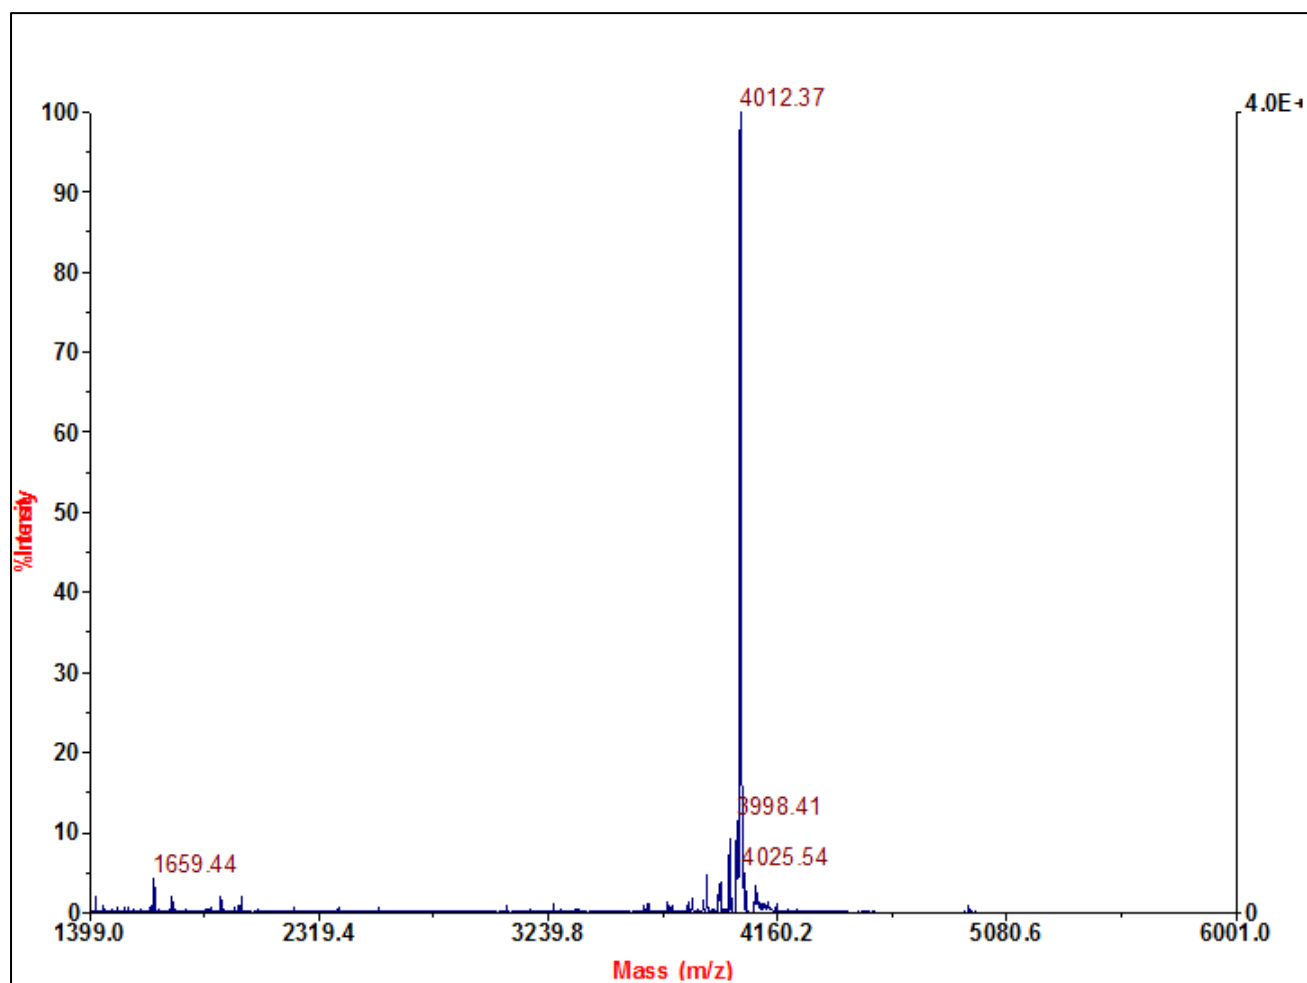

**Figure S60.** UV-melting curves of PNA5 with perfect match and mismatch DNA

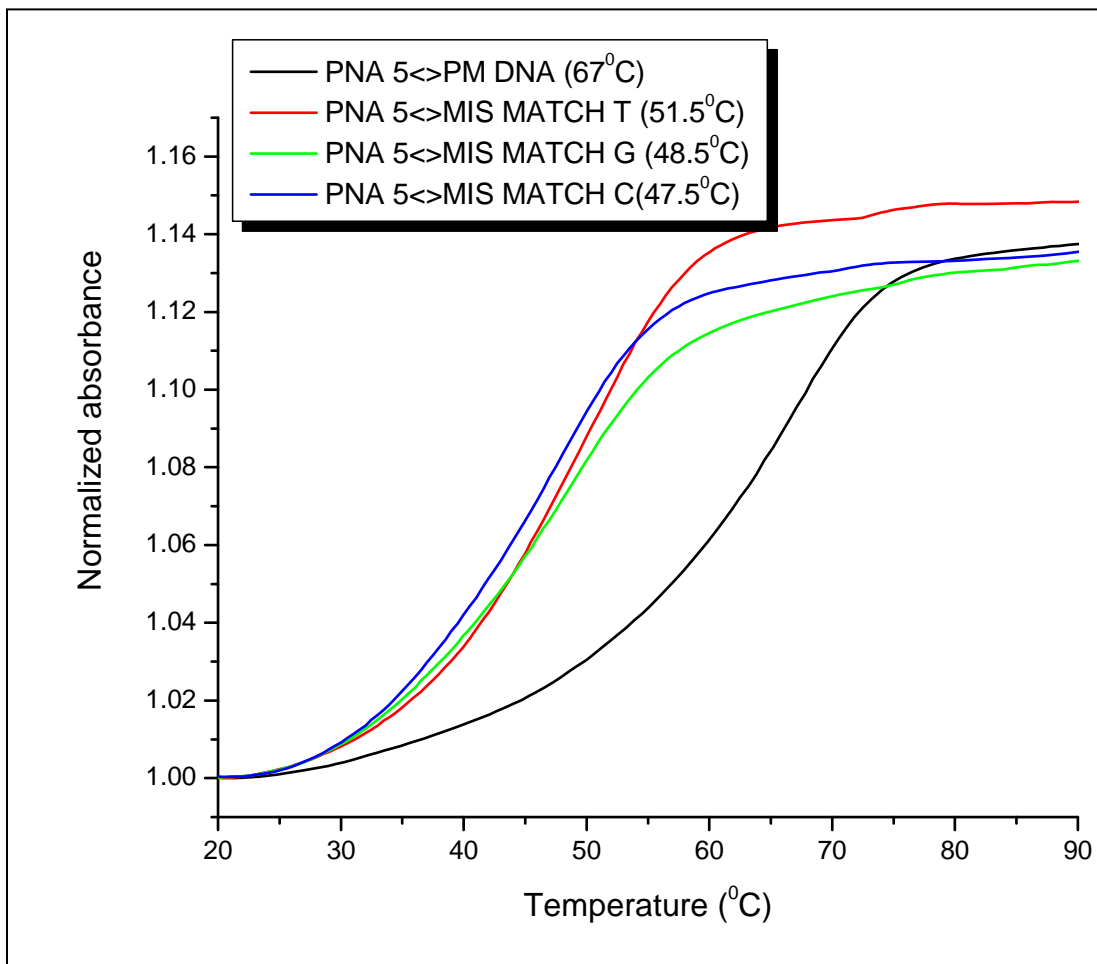

**Figure S61.** UV-melting curves of PNA5 with perfect match and mismatch RNA

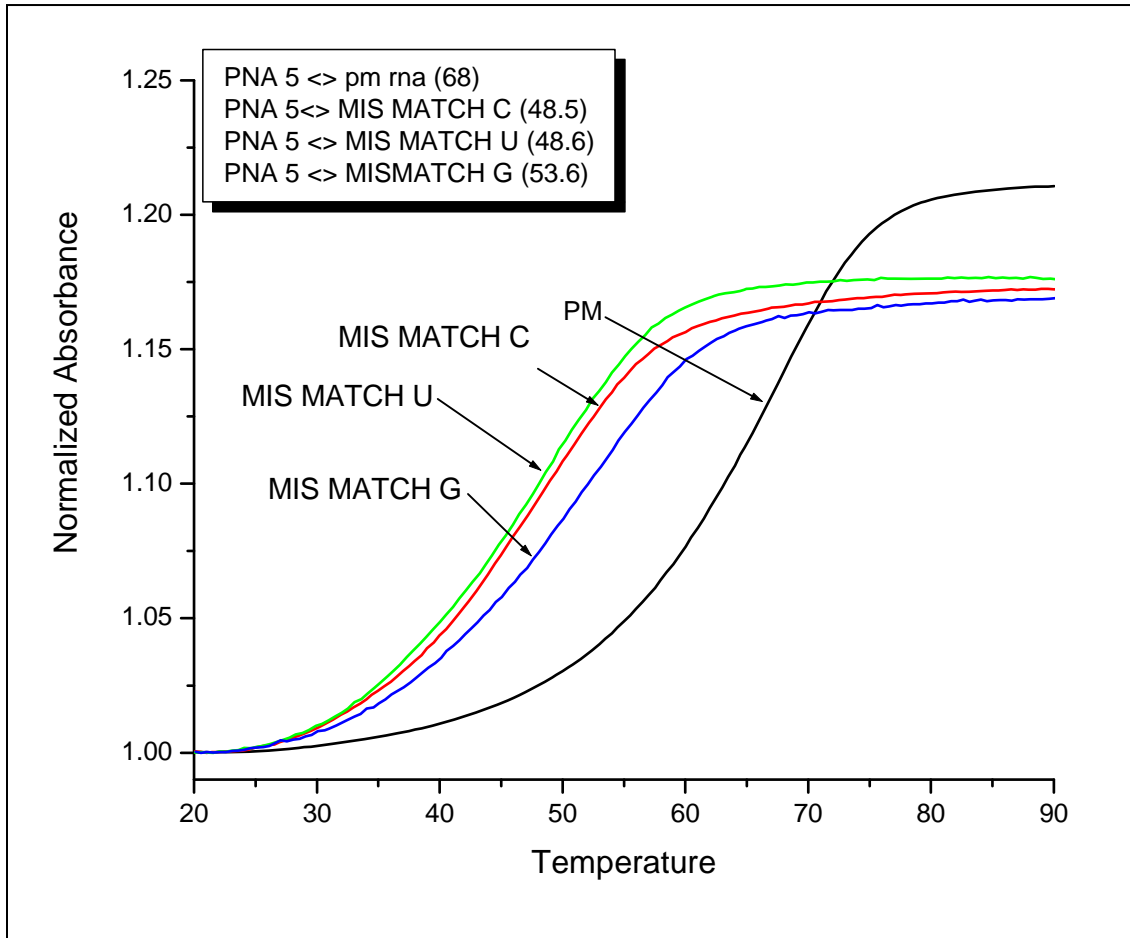

**Figure S62.** CD-melting curve of PNA2 (monitored at 260 nm, 5  $\mu$ M strand concentration, prepared in 10 mM NaPi buffer at pH 7.4)

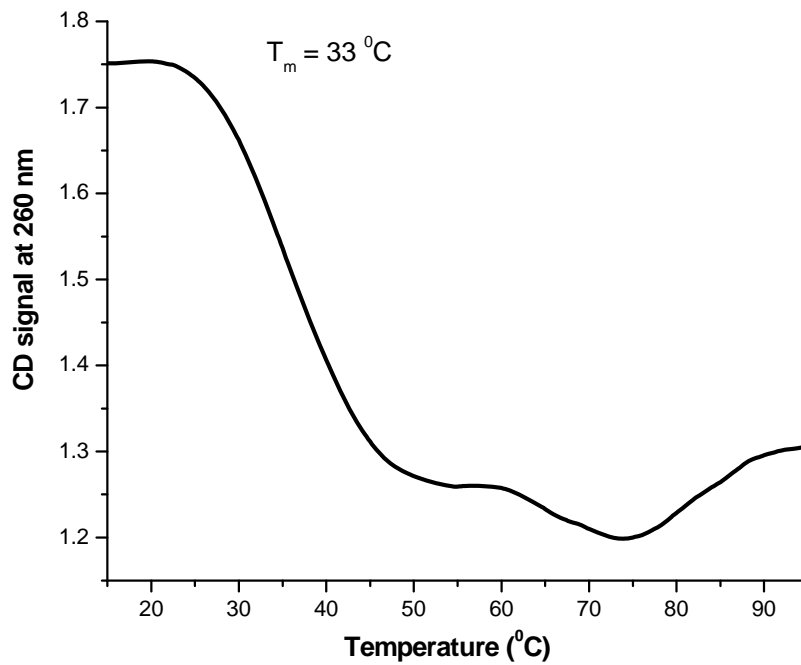



**Figure S63.** CD-melting curve of PNA3 (monitored at 260 nm, 5  $\mu$ M strand concentration, prepared in 10 mM NaPi buffer at pH 7.4)

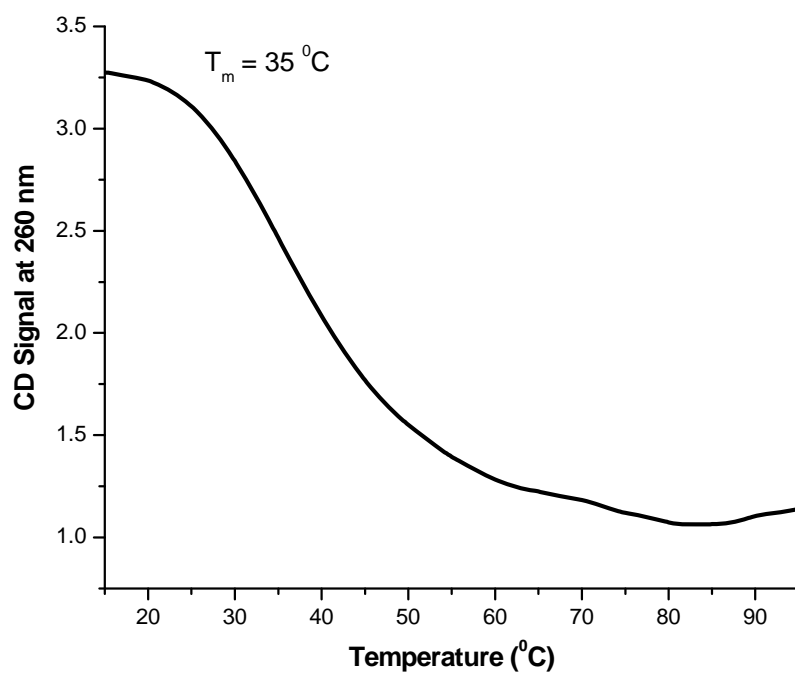

**Figure S64.** CD-melting curve of PNA4 (monitored at 260 nm, 5  $\mu$ M strand concentration, prepared in 10 mM NaPi buffer at pH 7.4)

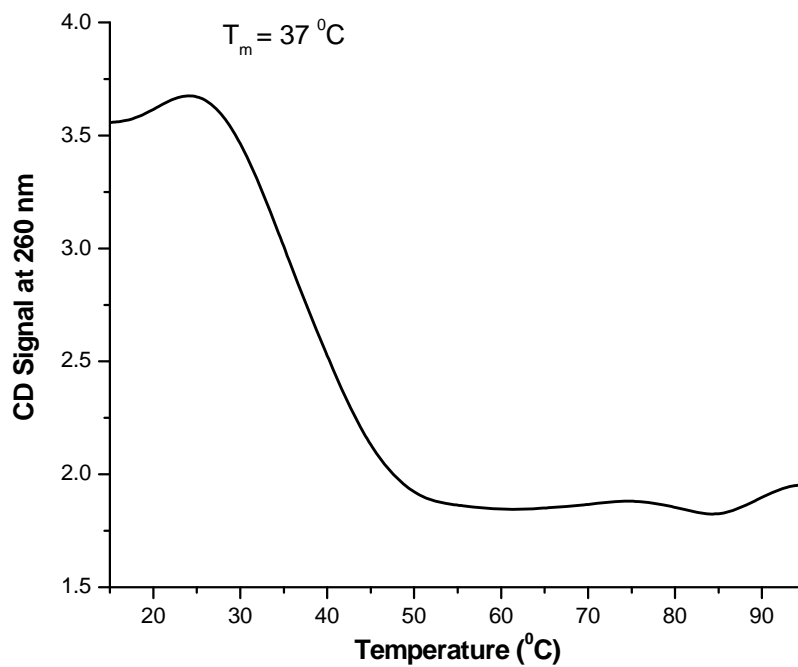

**Figure S65.** CD-melting curve of PNA5 (monitored at 260 nm, 5  $\mu$ M strand concentration, prepared in 10 mM NaPi buffer at pH 7.4)

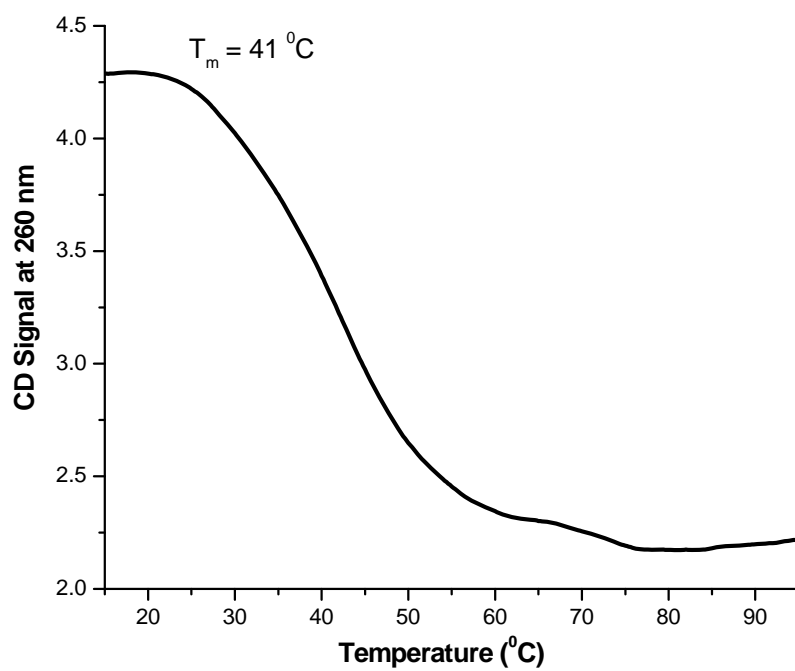

**Figure S66.** SPR sensorgrams (solid black lines) and fits (red dotted lines) for hybridization of PNA probes to immobilized perfect match DNA target. Solutions contained 10-50 nM PNA in 10 nM increments. Error bars at  $t = 420$  sec illustrate standard deviations for three separate trials.

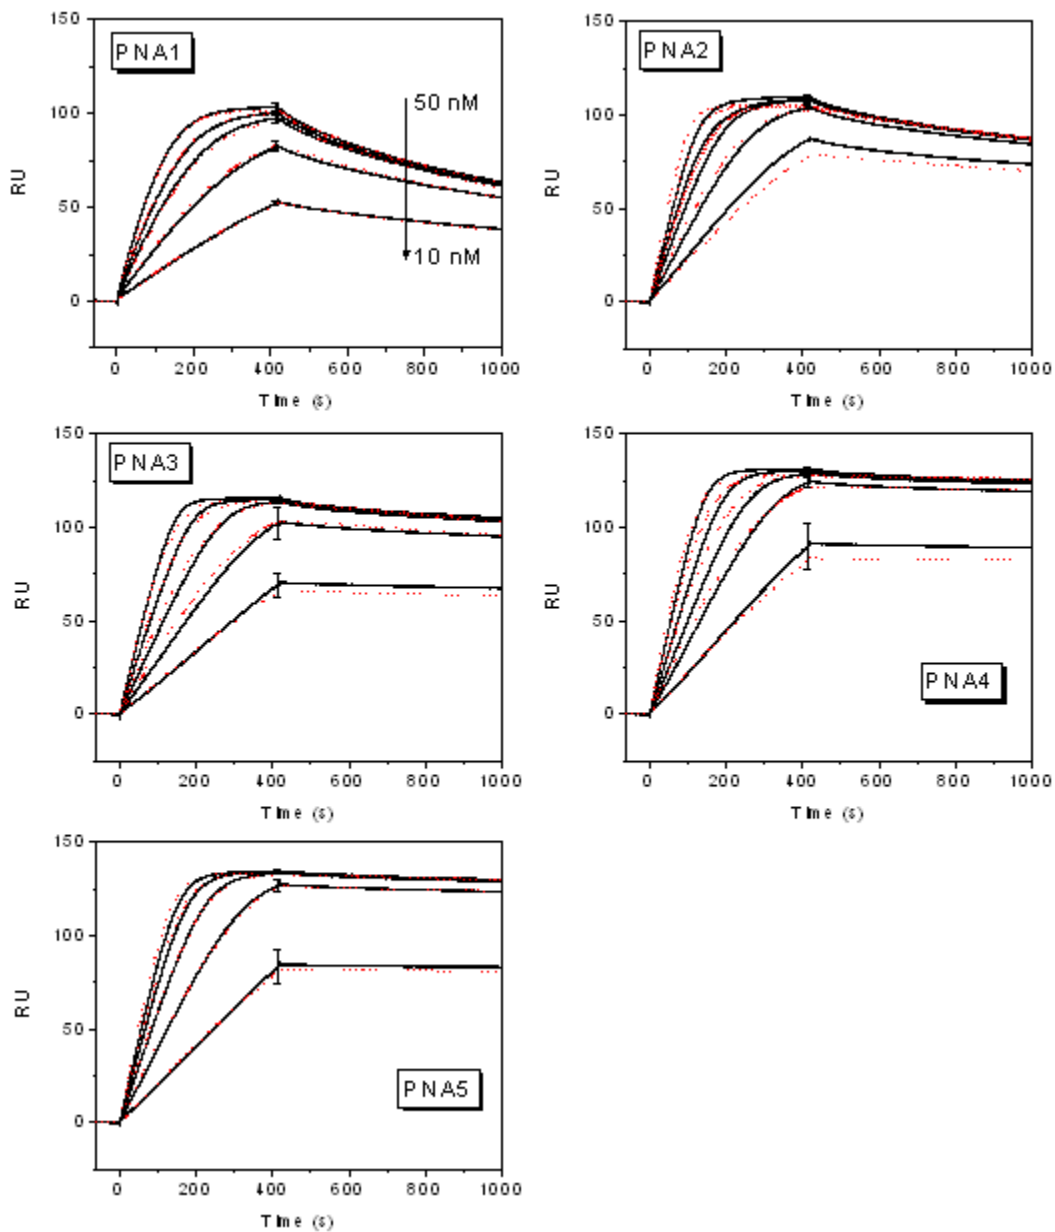

Supplement: NIHMS304580-supplement-1_si_001.pdf [file NIHMS304580-supplement-1_si_001.pdf]
